# Supplementary material for: Visible light-driven copper(ii) catalyzed aerobic oxidative cleavage of carbon–carbon bonds: a combined experimental and theoretical study
Source: Royal Society of Chemistry journal article supplement (doi:10.1039/d2qo01264b), 2022-01-01
Supplement: d2qo01264b1.pdf [file d2qo01264b1.pdf]

**Visible Light Driven Copper(II) Catalyzed Aerobic Oxidative Cleavage of  
Carbon–Carbon Bond: A Combined Experimental and Theoretical Study**

*Sanliang Li,<sup>a</sup> Dong Tian,<sup>a</sup> Xiaowei Zhao,<sup>a</sup> Yanli Yin,<sup>b</sup> Richmond Lee,<sup>c\*</sup> and Zhiyong Jiang<sup>a,b,\*</sup>*

<sup>a</sup> Key Laboratory of Natural Medicine and Immuno-Engineering of Henan Province, Henan University, Kaifeng, Henan, 475004, P. R. China

<sup>b</sup> School of Chemistry and Chemical Engineering, Henan Normal University, Xinxiang, Henan, 453007, P. R. China

<sup>c</sup> School of Chemistry and Molecular Bioscience and Molecular Horizons, University of Wollongong, Northfields Avenue, Wollongong, NSW 2522, Australia

Email: [jiangzhiyong@htu.edu.cn](mailto:jiangzhiyong@htu.edu.cn); [richmond\\_lee@uow.edu.au](mailto:richmond_lee@uow.edu.au)

**Supporting Information**

---

## Table of Contents

|                                                                                                                                                                          |     |
|--------------------------------------------------------------------------------------------------------------------------------------------------------------------------|-----|
| 1. General information                                                                                                                                                   | S3  |
| 2. General experimental procedure for the $\text{CuCl}_2 \cdot 2\text{H}_2\text{O}$ -catalyzed photooxygenation of diverse styrenes                                      | S4  |
| 3. General experimental procedure for the $\text{CuCl}_2 \cdot 2\text{H}_2\text{O}$ -catalyzed photooxygenation of aerobic oxygenation of vinyl halides                  | S5  |
| 4. General experimental procedure for the $\text{CuCl}_2 \cdot 2\text{H}_2\text{O}$ -catalyzed photooxygenation of aerobic oxygenation of alkynes                        | S6  |
| 5. General experimental procedure for the $\text{CuCl}_2 \cdot 2\text{H}_2\text{O}$ -catalyzed photooxygenation of aerobic oxygenation of aldehydes and carboxylic acids | S7  |
| 6. Other examined substrates                                                                                                                                             | S8  |
| 7. Theoretical details                                                                                                                                                   | S9  |
| 8. Table of energies: minimum and transition state structures                                                                                                            | S12 |
| 9. Characterization data of products                                                                                                                                     | S15 |
| 10. $^1\text{H}$ and $^{13}\text{C}$ NMR spectra                                                                                                                         | S22 |
| 11. Gaussian archive files                                                                                                                                               | S63 |

## 1. General information

Column chromatography was carried out with *silica gel* 60 (particle size 0.040–0.063 mm, 230–400 mesh) and commercially available solvents. Thin-layer chromatography (TLC) was conducted on aluminum sheets coated with *silica gel* 60 F254 with visualization by a UV lamp (254 or 360 nm).

$^1\text{H}$  and  $^{13}\text{C}$  NMR spectra were recorded at 300 and 75 MHz at 25 °C with a 300 MHz instrument. Chemical shifts are reported in parts per million (ppm), using the residual solvent signal as an internal standard:  $\text{CDCl}_3$  ( $^1\text{H}$  NMR:  $\delta$  7.26, singlet;  $^{13}\text{C}$  NMR:  $\delta$  77.0, triplet). Multiplicities were given as: *s* (singlet), *d* (doublet), *t* (triplet), *q* (quartet), *quintet*, *m* (multiplets), *dd* (doublet of doublets), *dt* (doublet of triplets), and *br* (broad). Coupling constants (*J*) were recorded in Hertz (Hz). The number of proton atoms (*n*) for a given resonance was indicated by *nH*. The number of carbon atoms (*n*) for a given resonance was indicated by *nC*. HRMS was reported in units of mass of charge ratio (*m/z*). Mass samples were dissolved in DCM and MeOH (HPLC Grade) unless otherwise stated. Electrochemical measurements were carried out by cyclic voltammetry (CV). The cyclic voltammetry was performed with an Autolab potentiostat by Echochemie under nitrogen atmosphere in a one-compartment electrolysis cell consisting of a platinum wire working electrode, a platinum wire counter electrode, and a quasi Ag/AgCl reference electrode. Cyclic voltammograms were monitored at scan rates of either 100  $\text{mV}\cdot\text{s}^{-1}$  or 50  $\text{mV}\cdot\text{s}^{-1}$  and recorded in distilled acetonitrile. The concentration of the complex was maintained at 0.5 mM or less and each solution contained 0.1 M of tetrabutylammonium hexafluorophosphate (TBAP) as the electrolyte.

## 2. General experimental procedure for the $\text{CuCl}_2 \cdot 2\text{H}_2\text{O}$ -Catalyzed Aerobic Photooxygenation of Diverse Styrenes

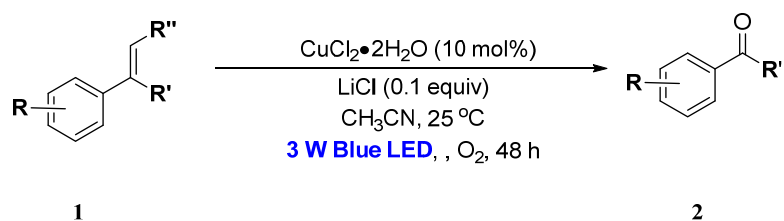

3.4 mg (0.02 mmol, 0.1 equiv) of  $\text{CuCl}_2 \cdot 2\text{H}_2\text{O}$ , **1** (0.2 mmol, 1.0 equiv), and 0.85 mg of LiCl (0.02 mmol, 0.1 equiv) was added into a 10.0 mL sample vial, and the reaction mixture was removed *in vacuo*, then 2.0 mL  $\text{CH}_3\text{CN}$  was sequentially added. The reaction mixture was stirred at 25 °C under an oxygen atmosphere (The sample vial was fitted with an oxygen balloon and the temperature was maintained in an incubator) and irradiated by a 3 W blue LED ( $\lambda = 450\text{--}455$  nm). The reaction was monitored by TLC. Upon complete consumption of **1**, the solvent was removed *in vacuo*. The reaction mixture was then loaded onto a short *silica gel* column, followed by gradient elution with petroleum ether/ethyl acetate (50/1–10/1 ratio), then concentrated the solvent *in vacuo* to afford products.

### 3. General experimental procedure for the $\text{CuCl}_2 \cdot 2\text{H}_2\text{O}$ -Catalyzed Aerobic Photooxygenation of Vinyl Halides

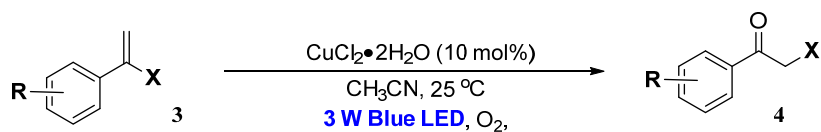

3.4 mg (0.02 mmol, 0.1 equiv) of  $\text{CuCl}_2 \cdot 2\text{H}_2\text{O}$ , and **3** (0.2 mmol, 1.0 equiv), was added into a 10.0 mL sample vial, and the reaction mixture was removed *in vacuo*, then 2.0 mL  $\text{CH}_3\text{CN}$  (HPLC Grade) was added. The reaction mixture was stirred at 25 °C under an oxygen atmosphere (The sample vial was fitted with an oxygen balloon and the temperature was maintained in an incubator) and irradiated by a 3 W blue LED ( $\lambda = 450\text{--}455$  nm). The reaction was monitored by TLC. Upon complete consumption of **3**, the solvent was removed *in vacuo*. The reaction mixture was then loaded onto a short *silica gel* column, followed by gradient elution with petroleum ether/ethyl acetate (50/1–10/1 ratio), then concentrated the solvent *in vacuo* to afford products.

#### 4. General experimental procedure for the $\text{CuCl}_2 \cdot 2\text{H}_2\text{O}$ -Catalyzed Aerobic Photooxygenation of Alkynes

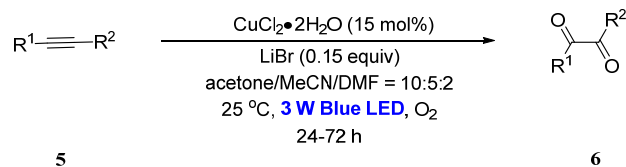

5.2 mg (0.03 mmol, 0.15 equiv) of  $\text{CuCl}_2 \cdot 2\text{H}_2\text{O}$ , **5** (0.2 mmol, 1.0 equiv), and 2.6 mg of LiBr (0.03 mmol, 0.15 equiv) was added into a 10.0 mL sample vial, and the reaction mixture was removed *in vacuo*, then 1.7 mL of solvent (acetone: $\text{CH}_3\text{CN}$ :DMF = 10:5:2) was added. The reaction mixture was stirred at 25 °C under an oxygen atmosphere (The sample vial was fitted with an oxygen balloon and the temperature was maintained in an incubator) and irradiated by a 3 W blue LED ( $\lambda = 450\text{--}455$  nm). The reaction was monitored by TLC. Upon complete consumption of **5**, the solvent was removed *in vacuo*. The reaction mixture was then loaded onto a short *silica gel* column, followed by gradient elution with petroleum ether/ethyl acetate (100/1–10/1 ratio), then concentrated the solvent *in vacuo* to afford products.

## 5. General experimental procedure for the $\text{CuCl}_2 \cdot 2\text{H}_2\text{O}$ -Catalyzed Aerobic Photooxygenation of Aldehydes and Carboxylic Acids

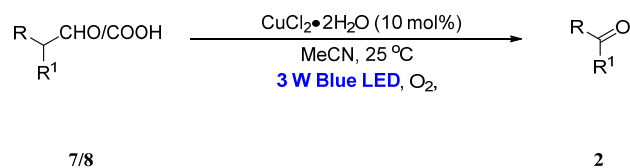

3.4 mg (0.02 mmol, 0.1 equiv) of  $\text{CuCl}_2 \cdot 2\text{H}_2\text{O}$ , and aldehydes or carboxylic acids (0.2 mmol, 1.0 equiv), was added into a 10.0 mL sample vial, and the reaction mixture was removed *in vacuo*, then 2.0 mL MeCN was sequentially added. The reaction mixture was stirred at 25 °C under an oxygen atmosphere (The sample vial was fitted with an oxygen balloon and the temperature was maintained in an incubator) and irradiated by a 3 W blue LED ( $\lambda = 450\text{--}455$  nm). The reaction was monitored by TLC. Upon complete consumption of **7/8**, the solvent was removed *in vacuo*, the reaction mixture was then loaded onto a short *silica gel* column, followed by gradient elution with petroleum ether/ethyl acetate (50/1–10/1 ratio), then concentrated the solvent *in vacuo* to afford products.

**6. Other examined substrates**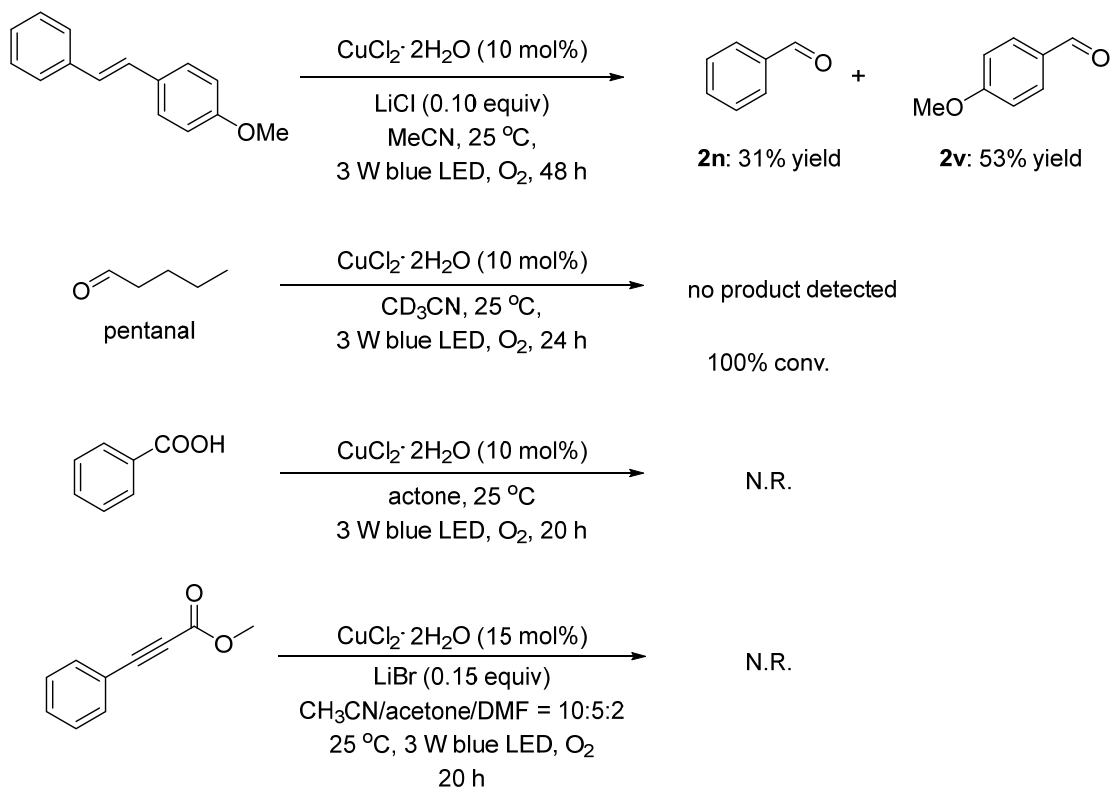



## 7. Computational Details

Density functional theory (DFT) modelling was carried out with Gaussian 16 computational chemistry suite.<sup>1</sup> Geometries of gas-phase minimum and transition state (TS) electronic structures were optimized with the M06 functional,<sup>2</sup> with Pople's basis-set 6-31G(d,p).<sup>3</sup> Frequency calculations were carried out at that level to ensure convergence (all positive eigenvalues for minima and single negative for TS structures). Thermal corrections were determined at the gas-phase M06/6-31G(d,p) level using the unscaled frequencies -  $G_{\text{correction}}$  and  $H_{\text{correction}}$  for free energy and enthalpy respectively. Gas-phase single point calculations at M06 and Dunning's aug-cc-pVTZ basis-set,<sup>4-8</sup> were carried out to determine the more accurate electronic energy ( $E_{\text{M06/aug-cc-pVTZ}}$ ). Solvation free energies ( $\Delta G_{\text{solv}}$ ) were considered with the PCM model (acetonitrile parameters),<sup>9</sup> on the optimized structures at M06/aug-cc-pVDZ level of theory. The reported solution free energy,  $G_{\text{sol}}$ , is the sum of  $E_{\text{M06/aug-cc-pVTZ}}$ ,  $\Delta G_{\text{solv}}$  and gas-phase thermal correction.

The structures of  $[\text{Cu}_4\text{OCl}_6]$  cluster of different spin states were considered. The low spin singlet (open-shell or OS) structure was calculated with the broken symmetry approach or antiferromagnetic coupling procedure for which the wavefunction was first stabilized (stable=opt). Then with the stable wavefunction as guess, the structure was optimized accordingly. The singlet (closed-shell or CS) was calculated with normal DFT procedures which yielded an unsymmetrical structure with large deviations in Cu-Cl bond distances. The energy of structure optimized by singlet (CS) method is most unstable amongst all. The structure of cluster optimized with the singlet (OS) approach is more symmetrical and very similar to the structures of triplet and quintet high spin states (see table below). However, the quintet spin state was calculated to be most stable, and as such all DFT modelling was performed in using this multiplicity.

| Multiplicity | 3D structure | Energy (hartrees) | Average Cu-Cl bond (Å) + Std. Dev. | Average Cu-O bond (Å) + Std. Dev. |
|--------------|--------------|-------------------|------------------------------------|-----------------------------------|
|              |              |                   |                                    |                                   |

|              |                                                                                     |              |                 |                 |
|--------------|-------------------------------------------------------------------------------------|--------------|-----------------|-----------------|
| Singlet (OS) | 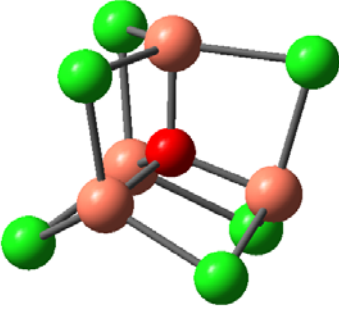   | -9397.313152 | $2.34 \pm 0.01$ | $1.84 \pm 0.00$ |
| Singlet (CS) |    | -9397.241205 | $2.41 \pm 0.42$ | $1.86 \pm 0.02$ |
| Triplet      |  | -9397.250048 | $2.34 \pm 0.00$ | $1.85 \pm 0.00$ |
| Quintet      |  | -9397.316961 | $2.34 \pm 0.00$ | $1.84 \pm 0.00$ |

## References

- (1) Frisch, M. J.; Trucks, G. W.; Schlegel, H. B.; Scuseria, G. E.; Robb, M. A.; Cheeseman, J. R.; Scalmani, G.; Barone, V.; Petersson, G. A.; Nakatsuji, H.; Li, X.; Caricato, M.; Marenich, A. V.; Bloino, J.; Janesko, B. G.; Gomperts, R.; Mennucci, B.; Hratchian, H. P.;

---

Ortiz, J. V.; Izmaylov, A. F.; Sonnenberg, J. L.; Williams-Young, D.; Ding, F.; Lipparini, F.; Egidi, F.; Goings, J.; Peng, B.; Petrone, A.; Henderson, T.; Ranasinghe, D.; Zakrzewski, V. G.; Gao, J.; Rega, N.; Zheng, G.; Liang, W.; Hada, M.; Ehara, M.; Toyota, K.; Fukuda, R.; Hasegawa, J.; Ishida, M.; Nakajima, T.; Honda, Y.; Kitao, O.; Nakai, H.; Vreven, T.; Throssell, K.; Montgomery, J. A., Jr.; Peralta, J. E.; Ogliaro, F.; Bearpark, M. J.; Heyd, J. J.; Brothers, E. N.; Kudin, K. N.; Staroverov, V. N.; Keith, T. A.; Kobayashi, R.; Normand, J.; Raghavachari, K.; Rendell, A. P.; Burant, J. C.; Iyengar, S. S.; Tomasi, J.; Cossi, M.; Millam, J. M.; Klene, M.; Adamo, C.; Cammi, R.; Ochterski, J. W.; Martin, R. L.; Morokuma, K.; Farkas, O.; Foresman, J. B.; Fox, D. J. *Gaussian~16 Revision A.03*; 2016.

(2) Zhao, Y.; Truhlar, D. G. The M06 Suite of Density Functionals for Main Group Thermochemistry, Thermochemical Kinetics, Noncovalent Interactions, Excited States, and Transition Elements: Two New Functionals and Systematic Testing of Four M06-Class Functionals and 12 Other Functionals. *Theor. Chem. Acc.* **2008**, *120* (1–3), 215–241. <https://doi.org/10.1007/s00214-007-0310-x>.

(3) Ditchfield, R.; Hehre, W. J.; Pople, J. A. Self-Consistent Molecular-Orbital Methods. IX. An Extended Gaussian-Type Basis for Molecular-Orbital Studies of Organic Molecules. *J. Chem. Phys.* **1971**, *54* (2), 724–728. <https://doi.org/10.1063/1.1674902>.

(4) Dunning, T. H. Gaussian Basis Sets for Use in Correlated Molecular Calculations. I. The Atoms Boron through Neon and Hydrogen. *J. Chem. Phys.* **1989**, *90* (2), 1007–1023. <https://doi.org/10.1063/1.456153>.

(5) Kendall, R. A.; Dunning, T. H.; Harrison, R. J. Electron Affinities of the First-row Atoms Revisited. Systematic Basis Sets and Wave Functions. *J. Chem. Phys.* **1992**, *96* (9), 6796–6806. <https://doi.org/10.1063/1.462569>.

(6) Woon, D. E.; Dunning, T. H. Gaussian Basis Sets for Use in Correlated Molecular Calculations. III. The Atoms Aluminum through Argon. *J. Chem. Phys.* **1993**, *98* (2), 1358–1371. <https://doi.org/10.1063/1.464303>.

(7) Peterson, K. A.; Woon, D. E.; Dunning, T. H. Benchmark Calculations with Correlated Molecular Wave Functions. IV. The Classical Barrier Height of the  $\text{H}+\text{H}_2 \rightarrow \text{H}_2+\text{H}$  Reaction. *J. Chem. Phys.* **1994**, *100* (10), 7410–7415. <https://doi.org/10.1063/1.466884>.

(8) Davidson, E. R. Comment on “Comment on Dunning’s Correlation-Consistent Basis Sets.” *Chem. Phys. Lett.* **1996**, *260* (3–4), 514–518. [https://doi.org/10.1016/0009-2614\(96\)00917-7](https://doi.org/10.1016/0009-2614(96)00917-7).

(9) Scalmani, G.; Frisch, M. J. Continuous Surface Charge Polarizable Continuum Models of Solvation. I. General Formalism. *J. Chem. Phys.* **2010**, *132* (11), 114110. <https://doi.org/10.1063/1.3359469>.

## 8. Table of Energies: Minimum and Transition State Structures

| Species                         | $G_{\text{correction}}$ | $H_{\text{correction}}$ | $E_{\text{M06/aug-cc-pVTZ}}$ | $G_{\text{gas}}$ | $\Delta G_{\text{solv}}$ | $G_{\text{sol}}$ |
|---------------------------------|-------------------------|-------------------------|------------------------------|------------------|--------------------------|------------------|
| Chlorostyrene                   | hartrees                | hartrees                | hartrees                     | kcal/mol         | kcal/mol                 | kcal/mol         |
| $\alpha$ -chlorostyrene (c-sty) | 0.090766                | 0.132413                | -769.1029472                 | -482555.14       | -2.26                    | -482557.40       |
| O2t                             | -0.01604                | 0.007235                | -150.3026044                 | -94324.95        | -0.05                    | -94325.00        |
| pdt1                            | 0.094293                | 0.139037                | -844.3417883                 | -529765.30       | -4.59                    | -529769.89       |
| cpx1                            | -0.03763                | 0.032911                | -9398.801785                 | -5897771.73      | -16.30                   | -5897788.03      |
| cpx1 + sty                      | 0.053134                | 0.165324                | -10167.90473                 | -6380326.88      | -18.56                   | -6380345.44      |
| cpx1 + O2 + c-sty               | 0.037097                | 0.172559                | -10318.20734                 | -6474651.83      | -18.61                   | -6474670.44      |
| cpx2                            | 0.07185                 | 0.167256                | -10167.94178                 | -6380338.38      | -17.13                   | -6380355.51      |
| TS1                             | 0.074249                | 0.165431                | -10167.93202                 | -6380330.75      | -18.4                    | -6380349.15      |
| cpx3                            | 0.073544                | 0.166625                | -10167.93924                 | -6380335.73      | -16.86                   | -6380352.59      |
| cpx4                            | 0.075335                | 0.176216                | -10318.23295                 | -6474643.90      | -24.79                   | -6474668.69      |
| TS2                             | 0.077908                | 0.174545                | -10318.22189                 | -6474635.35      | -22.88                   | -6474658.23      |
| cpx5                            | 0.084626                | 0.17778                 | -10318.27203                 | -6474662.59      | -18.4                    | -6474680.99      |
| TS3                             | 0.084859                | 0.176859                | -10318.26385                 | -6474657.31      | -14.2                    | -6474671.51      |
| cpx6                            | 0.084184                | 0.178081                | -10318.27803                 | -6474666.64      | -17.83                   | -6474684.47      |
| cpx7                            | 0.080646                | 0.178465                | -10318.27727                 | -6474668.38      | -14.84                   | -6474683.22      |
| TS4                             | 0.078688                | 0.176463                | -10318.24835                 | -6474651.46      | -16.34                   | -6474667.80      |
| cpx8                            | 0.080092                | 0.179036                | -10318.2919                  | -6474677.91      | -19.22                   | -6474697.13      |
| TS5                             | 0.078729                | 0.176745                | -10318.26194                 | -6474659.97      | -15.00                   | -6474674.97      |
| TS3a                            | 0.076949                | 0.175726                | -10318.18552                 | -6474613.13      | -16.12                   | -6474629.25      |
| cpx9                            | 0.084242                | 0.177975                | -10318.30919                 | -6474686.16      | -13.08                   | -6474699.24      |
| int5 - pdt1 + c-sty             | 0.080715                | 0.171351                | -10243.07035                 | -6427475.997     | -10.75                   | -6427486.75      |

|                                                  |          |          |              |             |          |             |
|--------------------------------------------------|----------|----------|--------------|-------------|----------|-------------|
| <b>cpx10</b>                                     | 0.076168 | 0.171189 | -10243.05462 | -6427468.98 | -13.66   | -6427482.64 |
| <b>TS6</b>                                       | 0.077692 | 0.169939 | -10243.04098 | -6427459.46 | -20.65   | -6427480.11 |
| <b>cpx11</b>                                     | 0.080229 | 0.171624 | -10243.0899  | -6427488.57 | -17.17   | -6427505.74 |
| <b>TS7</b>                                       | 0.077038 | 0.170009 | -10243.078   | -6427483.10 | -17.59   | -6427500.69 |
| <b>cpx1 + pdt1</b>                               | 0.056661 | 0.171948 | -10243.14357 | -6427537.04 | -20.89   | -6427557.93 |
| <b>cpx1a</b>                                     | 0.073481 | 0.167771 | -10167.94562 | -6380339.77 | -15.10   | -6380354.87 |
| <b>cpx1a + O2</b>                                | 0.057444 | 0.175006 | -10318.24822 | -6474664.71 | -15.15   | -6474679.86 |
| <b>TS1a</b>                                      | 0.078328 | 0.174447 | -10318.20878 | -6474626.86 | -17.39   | -6474644.25 |
| <b>cpx2a</b>                                     | 0.08127  | 0.177059 | -10318.23091 | -6474638.90 | -13.18   | -6474652.08 |
| <b>TS2a</b>                                      | 0.082998 | 0.175457 | -10318.21933 | -6474630.55 | -14.20   | -6474644.75 |
| <b>cpx3a</b>                                     | 0.082541 | 0.176831 | -10318.21957 | -6474630.99 | -17.69   | -6474648.68 |
| <b>cpx6a</b>                                     | 0.082389 | 0.177954 | -10318.26159 | -6474657.45 | -17.13   | -6474674.58 |
| <b>TS4a</b>                                      | 0.081157 | 0.175427 | -10318.19444 | -6474616.08 | -27.21   | -6474643.29 |
| <b>Methylstyrene</b>                             | hartrees | hartrees | hartrees     | kcal/mol    | kcal/mol | kcal/mol    |
| <b><math>\alpha</math>-methylstyrene (m-sty)</b> | 0.128215 | 0.169955 | -348.7965871 | -218789.40  | -2.04    | -218791.44  |
| <b>ketone (ket)</b>                              | 0.105091 | 0.146432 | -384.7455686 | -241361.90  | -4.54    | -241366.44  |
| <b>aldehyde (ald)</b>                            | 0.005609 | 0.030423 | -114.4797952 | -71832.55   | -3.37    | -71835.92   |
| <b>cpx1 + m-sty</b>                              | 0.090583 | 0.202866 | -9747.598373 | -6116561.14 | -18.34   | -6116579.48 |
| <b>cpx1 + O2 + m-sty</b>                         | 0.074546 | 0.210101 | -9897.900977 | -6210886.09 | -18.39   | -6210904.48 |
| <b>cpx2b</b>                                     | 0.109609 | 0.204828 | -9747.639128 | -6116574.77 | -17.07   | -6116591.84 |
| <b>TS1b</b>                                      | 0.111011 | 0.20277  | -9747.633892 | -6116570.61 | -16.99   | -6116587.60 |
| <b>cpx3b</b>                                     | 0.110922 | 0.204202 | -9747.63687  | -6116572.53 | -17.55   | -6116590.08 |
| <b>cpx4b</b>                                     | 0.116014 | 0.214555 | -9897.93415  | -6210880.88 | -26.1    | -6210906.98 |
| <b>TS2b</b>                                      | 0.115599 | 0.211959 | -9897.924916 | -6210875.35 | -16.99   | -6210892.34 |

|                         |          |          |              |             |        |             |
|-------------------------|----------|----------|--------------|-------------|--------|-------------|
| <b>cpx5b</b>            | 0.121448 | 0.215405 | -9897.970204 | -6210900.09 | -19.76 | -6210919.85 |
| <b>TS3b</b>             | 0.122314 | 0.214414 | -9897.958051 | -6210891.92 | -18.12 | -6210910.04 |
| <b>cpx6b</b>            | 0.122104 | 0.215777 | -9897.972602 | -6210901.19 | -19.4  | -6210920.59 |
| <b>cpx7b</b>            | 0.121801 | 0.215852 | -9897.96334  | -6210895.57 | -17.19 | -6210912.76 |
| <b>TS4b</b>             | 0.118652 | 0.213152 | -9897.901478 | -6210858.72 | -25.77 | -6210884.49 |
| <b>cpx8b</b>            | 0.121449 | 0.215328 | -9897.943044 | -6210883.05 | -16.6  | -6210899.65 |
| <b>LiCl</b>             | -0.01935 | 0.004848 | -467.8023953 | -293558.15  | -41.54 | -293599.69  |
| <b>cpx7b_LiCl</b>       | 0.11738  | 0.222107 | -10365.80194 | -6504467.06 | -49.65 | -6504516.71 |
| <b>TS4b_LiCl</b>        | 0.117008 | 0.220307 | -10365.77705 | -6504451.68 | -39.25 | -6504490.93 |
| <b>Cl-</b>              | -0.01502 | 0.00236  | -460.2683751 | -288827.83  | -68.57 | -288896.40  |
| <b>cpx7b_Cl</b>         | 0.115943 | 0.218813 | -10358.35112 | -6499792.57 | -41.93 | -6499834.50 |
| <b>TS4b_Cl</b>          | 0.118529 | 0.216605 | -10358.30064 | -6499759.27 | -47.43 | -6499806.70 |
| <b>TS5b</b>             | 0.117316 | 0.213946 | -9897.955942 | -6210893.74 | -19.76 | -6210913.50 |
| <b>cpx8b</b>            | 0.122402 | 0.215276 | -9897.981815 | -6210906.78 | -16.52 | -6210923.30 |
| <b>TS5b</b>             | 0.115719 | 0.212745 | -9898.041089 | -6210948.17 | -15.24 | -6210963.41 |
| <b>cpx9b</b>            | 0.119833 | 0.216458 | -9897.971218 | -6210901.74 | -16.9  | -6210918.64 |
| <b>TS5b</b>             | 0.117289 | 0.213197 | -9897.918307 | -6210870.14 | -16.88 | -6210887.02 |
| <b>int1 + ket + ald</b> | 0.073068 | 0.209766 | -9898.027149 | -6210966.19 | -24.21 | -6210990.40 |
| <b>cpx3c</b>            | 0.113419 | 0.21305  | -9897.912137 | -6210868.70 | -14.51 | -6210883.21 |
| <b>TS1c</b>             | 0.115345 | 0.211766 | -9897.901466 | -6210860.79 | -17.81 | -6210878.60 |
| <b>cpx4c</b>            | 0.118947 | 0.215324 | -9897.96877  | -6210900.76 | -19.18 | -6210919.94 |

## 9. Characterization data of products

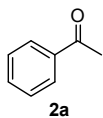

Colorless oil; 73% yield (from 1a, 17.6 mg); 83% yield (from **7a**, 20 mg); 87% yield (from **8a**, 21 mg)  $^1\text{H NMR}$  (300 MHz,  $\text{CDCl}_3$ )  $\delta$  8.04–7.88 (m, 2H), 7.54 (ddd,  $J = 6.5, 3.8, 1.2$  Hz, 1H), 7.43 (dd,  $J = 10.3, 4.6$  Hz, 2H), 2.58 (s, 3H);  $^{13}\text{C NMR}$  (75 MHz,  $\text{CDCl}_3$ )  $\delta$  198.1, 136.9, 133.0, 128.5, 128.2, 26.5.

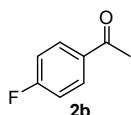

Colorless oil; 70% yield (from **1b**, 19.3 mg); 80% yield (from **8b**, 22 mg);  $^1\text{H NMR}$  (300 MHz,  $\text{CDCl}_3$ )  $\delta$  8.07–7.86 (m, 2H), 7.18–7.01 (m, 2H), 2.57 (s, 3H);  $^{13}\text{C NMR}$  (75 MHz,  $\text{CDCl}_3$ )  $\delta$  196.5, 165.7 (d,  $J = 254.6$  Hz), 133.4 (d,  $J = 3.0$  Hz), 130.9 (d,  $J = 9.4$  Hz), 115.6 (d,  $J = 21.9$  Hz), 26.5.

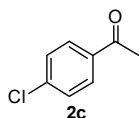

Colorless oil; 56% yield (16.7 mg);  $^1\text{H NMR}$  (300 MHz,  $\text{CDCl}_3$ )  $\delta$  7.94–7.79 (m, 2H), 7.48–7.32 (m, 2H), 2.57 (d,  $J = 1.3$  Hz, 3H);  $^{13}\text{C NMR}$  (75 MHz,  $\text{CDCl}_3$ )  $\delta$  196.8, 139.4, 135.3, 129.6, 128.8, 26.5.

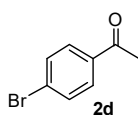

White solid; 72% yield (28.7 mg);  $^1\text{H NMR}$  (300 MHz,  $\text{CDCl}_3$ )  $\delta$  7.87–7.71 (m, 2H), 7.63–7.49 (m, 2H), 2.55 (s, 3H);  $^{13}\text{C NMR}$  (75 MHz,  $\text{CDCl}_3$ )  $\delta$  196.9, 135.7, 131.8, 129.7, 128.2, 26.4.

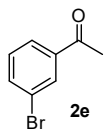

Colorless oil; 75% yield (29.7 mg);  $^1\text{H NMR}$  (300 MHz,  $\text{CDCl}_3$ )  $\delta$  8.07 (t,  $J = 1.7$  Hz, 1H), 7.86 (d,  $J = 7.8$  Hz, 1H), 7.72–7.64 (m, 1H), 7.34 (t,  $J = 7.9$  Hz, 1H), 2.58 (s, 3H);  $^{13}\text{C NMR}$  (75 MHz,  $\text{CDCl}_3$ )  $\delta$  196.6, 138.7, 135.9, 131.3, 130.2, 126.8, 122.9, 26.6.

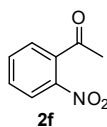

Yellow oil; 90% yield (29.2 mg);  $^1\text{H NMR}$  (300 MHz,  $\text{CDCl}_3$ )  $\delta$  8.06 (dd,  $J = 8.2, 0.6$  Hz, 0H), 7.71 (td,  $J = 7.5, 1.0$  Hz, 0H), 7.59 (td,  $J = 8.1, 1.4$  Hz, 0H), 7.42 (dd,  $J = 7.5, 1.2$  Hz, 0H), 2.53 (s, 3H);  $^{13}\text{C NMR}$  (75 MHz,  $\text{CDCl}_3$ )  $\delta$  199.9, 145.6, 137.8, 134.2, 130.6, 127.2, 124.3, 30.1.

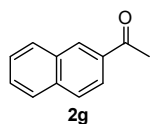

White solid; 84% yield (28.6 mg);  $^1\text{H NMR}$  (300 MHz,  $\text{CDCl}_3$ )  $\delta$  8.46 (s, 1H), 8.07–7.82 (m, 4H), 7.66–7.50 (m, 2H), 2.73 (s, 3H);  $^{13}\text{C NMR}$  (75 MHz,  $\text{CDCl}_3$ )  $\delta$  198.1, 135.5, 134.4, 132.4, 130.2, 129.5, 128.4, 128.4, 127.7, 126.7, 123.8, 26.7.

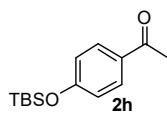

White solid; 62% yield (30.1 mg);  $^1\text{H NMR}$  (300 MHz,  $\text{CDCl}_3$ )  $\delta$  7.93–7.81 (m, 2H), 6.87 (t,  $J = 5.7$  Hz, 2H), 2.55 (s, 3H), 0.98 (s, 9H), 0.22 (s, 6H);  $^{13}\text{C NMR}$  (75 MHz,  $\text{CDCl}_3$ )  $\delta$  196.9, 160.2, 130.8, 130.5, 119.8, 26.4, 25.5, 18.2, -4.4.

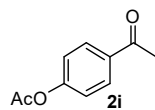

White solid; 88% yield (31.5 mg);  $^1\text{H NMR}$  (300 MHz,  $\text{CDCl}_3$ )  $\delta$  7.98 (d,  $J = 8.6$  Hz, 2H), 7.18 (d,  $J = 8.6$  Hz, 2H), 2.58 (s, 3H), 2.31 (s, 3H);  $^{13}\text{C NMR}$  (75 MHz,  $\text{CDCl}_3$ )  $\delta$  196.8, 168.9, 154.2, 134.6, 129.9, 121.7, 26.6, 21.1.

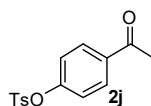

White solid; 73% yield (43.7 mg);  $^1\text{H NMR}$  (300 MHz,  $\text{CDCl}_3$ )  $\delta$  7.89 (d,  $J = 8.6$  Hz, 2H), 7.71 (d,  $J = 8.2$  Hz, 2H), 7.32 (d,  $J = 8.3$  Hz, 2H), 7.08 (d,  $J = 8.6$  Hz, 2H), 2.57 (s, 3H), 2.45 (s, 3H);  $^{13}\text{C NMR}$  (75 MHz,  $\text{CDCl}_3$ )  $\delta$  196.6, 152.9, 145.8, 135.6, 132.0, 130.0, 129.9, 128.4, 122.5, 26.6, 21.7.

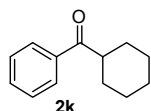

Colorless oil; 71% yield (26.7 mg);  $^1\text{H NMR}$  (300 MHz,  $\text{CDCl}_3$ )  $\delta$  7.94 (d,  $J = 7.4$  Hz, 2H), 7.54 (t,  $J = 7.2$  Hz, 1H), 7.46 (t,  $J = 7.4$  Hz, 2H), 3.26 (t,  $J = 10.8$  Hz, 1H), 1.87 (t,  $J = 12.9$  Hz, 4H), 1.74 (d,  $J = 11.9$  Hz, 1H), 1.60–1.18 (m, 5H);  $^{13}\text{C NMR}$  (75 MHz,  $\text{CDCl}_3$ )  $\delta$  203.9, 136.3, 132.7, 128.6, 128.2, 45.6, 29.4, 25.9, 25.8.

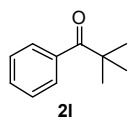

Colorless oil; 62% yield (20.1 mg);  $^1\text{H NMR}$  (300 MHz,  $\text{CDCl}_3$ )  $\delta$  7.69 (d,  $J = 7.1$  Hz, 2H), 7.50–7.34 (m, 3H), 1.35 (s, 9H);  $^{13}\text{C NMR}$  (75 MHz,  $\text{CDCl}_3$ )  $\delta$  209.2, 138.5, 130.7, 128.0, 127.7, 44.1, 28.9.

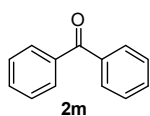

White solid; 70% yield (from **1m**, 26.4 mg); 69% yield (from **8f**, 25 mg);  $^1\text{H NMR}$  (300 MHz,  $\text{CDCl}_3$ )  $\delta$  7.91–7.73 (m, 4H), 7.64–7.53 (m, 2H), 7.47 (t,  $J = 7.6$  Hz, 4H);  $^{13}\text{C NMR}$  (75 MHz,  $\text{CDCl}_3$ )  $\delta$  196.5, 137.4, 132.3, 129.9, 128.1.



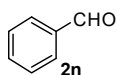

Colorless oil; 81% yield (from **1n**, 34.0 mg); 62% yield (from **1o**, 13.2 mg); 33% yield (from **1p**, 7 mg); 80% yield (from **7e**, 18 mg);  $^1\text{H NMR}$  (300 MHz,  $\text{CDCl}_3$ )  $\delta$  10.01 (s, 1H), 7.87 (dd,  $J = 8.2, 1.2$  Hz, 2H), 7.68–7.58 (m, 1H), 7.52 (t,  $J = 7.4$  Hz, 2H);  $^{13}\text{C NMR}$  (75 MHz,  $\text{CDCl}_3$ )  $\delta$  192.4, 136.3, 134.4, 129.7, 128.9.

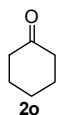

Colorless oil; 68% yield (from **7b**, 13.4 mg); 71% yield (from **8k**, 14 mg);  $^1\text{H NMR}$  (300 MHz,  $\text{CDCl}_3$ )  $\delta$  2.29 (t,  $J = 6.4$  Hz, 4H), 1.81 (d,  $J = 5.7$  Hz, 4H), 1.69 (d,  $J = 4.1$  Hz, 2H);  $^{13}\text{C NMR}$  (75 MHz,  $\text{CDCl}_3$ )  $\delta$  212.1, 41.9, 26.9, 24.9.

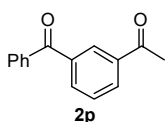

White solid; 66% yield (29.5 mg);  $^1\text{H NMR}$  (300 MHz,  $\text{CDCl}_3$ )  $\delta$  8.36 (s, 1H), 8.17 (d,  $J = 7.8$  Hz, 1H), 7.98 (d,  $J = 7.6$  Hz, 1H), 7.79 (d,  $J = 7.5$  Hz, 2H), 7.68–7.54 (m, 2H), 7.50 (t,  $J = 7.5$  Hz, 2H), 2.64 (s, 3H);  $^{13}\text{C NMR}$  (75 MHz,  $\text{CDCl}_3$ )  $\delta$  197.2, 195.8, 138.0, 137.1, 136.9, 134.2, 132.8, 131.7, 130.0, 129.6, 128.7, 128.4, 26.7.

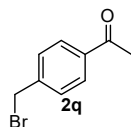

White solid; 40% yield (17.0 mg);  $^1\text{H NMR}$  (300 MHz,  $\text{CDCl}_3$ )  $\delta$  7.92 (d,  $J = 8.1$  Hz, 2H), 7.47 (d,  $J = 8.1$  Hz, 2H), 4.49 (s, 2H), 2.59 (s, 3H);  $^{13}\text{C NMR}$  (75 MHz,  $\text{CDCl}_3$ )  $\delta$  197.4, 142.8, 136.8, 129.2, 128.8, 32.1, 26.7.

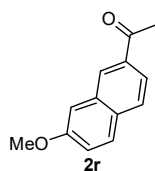

White solid; 85% yield (34.0 mg);  $^1\text{H NMR}$  (300 MHz,  $\text{CDCl}_3$ )  $\delta$  8.38 (s, 1H), 8.00 (d,  $J = 8.6$  Hz, 1H), 7.84 (d,  $J = 8.9$  Hz, 1H), 7.76 (d,  $J = 8.6$  Hz, 1H), 7.20 (d,  $J = 9.0$  Hz, 1H), 7.14 (s, 1H), 3.94 (s, 3H), 2.69 (s, 3H);  $^{13}\text{C NMR}$  (75 MHz,  $\text{CDCl}_3$ )  $\delta$  197.8, 159.7, 137.2, 132.6, 131.1, 130.0, 127.8, 127.0, 124.6, 119.7, 105.7, 55.4, 26.5.

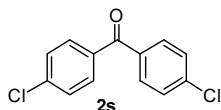

White solid; 62% yield (31.0 mg);  $^1\text{H NMR}$  (300 MHz,  $\text{CDCl}_3$ )  $\delta$  7.72 (d,  $J = 7.6$  Hz, 4H), 7.47 (d,  $J = 7.7$  Hz, 4H);  $^{13}\text{C NMR}$  (75 MHz,  $\text{CDCl}_3$ )  $\delta$  194.2, 139.1, 135.5, 131.3, 128.8.

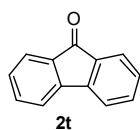

White solid; 74% yield (26.8 mg);  $^1\text{H NMR}$  (300 MHz,  $\text{CDCl}_3$ )  $\delta$  7.65 (d,  $J = 7.3$  Hz, 2H), 7.54–7.43 (m, 4H), 7.33–7.25 (m, 2H);  $^{13}\text{C NMR}$  (75 MHz,  $\text{CDCl}_3$ )  $\delta$  193.9, 144.4, 134.7, 134.1, 129.0, 124.3, 120.3.

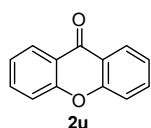

White solid; 97% yield (38.0 mg);  $^1\text{H}$  NMR (300 MHz,  $\text{CDCl}_3$ )  $\delta$  8.34 (d,  $J = 7.9$  Hz, 2H), 7.73 (t,  $J = 7.7$  Hz, 2H), 7.49 (d,  $J = 8.4$  Hz, 2H), 7.38 (t,  $J = 7.5$  Hz, 2H);  $^{13}\text{C}$  NMR (75 MHz,  $\text{CDCl}_3$ )  $\delta$  177.2, 156.1, 134.8, 126.7, 123.9, 121.7, 117.9.

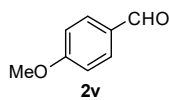

Colorless oil; 73% yield (20.0 mg);  $^1\text{H}$  NMR (300 MHz,  $\text{CDCl}_3$ )  $\delta$  9.86 (s, 1H), 7.81 (d,  $J = 8.4$  Hz, 2H), 6.98 (d,  $J = 8.3$  Hz, 2H), 3.86 (s, 3H);  $^{13}\text{C}$  NMR (75 MHz,  $\text{CDCl}_3$ )  $\delta$  190.8, 164.5, 131.9, 129.8, 114.2, 55.5.

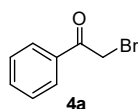

White solid; 82% yield (28.7 mg);  $^1\text{H}$  NMR (300 MHz,  $\text{CDCl}_3$ )  $\delta$  8.02–7.94 (m, 2H), 7.65–7.56 (m, 1H), 7.48 (dd,  $J = 10.4, 4.7$  Hz, 2H), 4.46 (s, 2H);  $^{13}\text{C}$  NMR (75 MHz,  $\text{CDCl}_3$ )  $\delta$  191.2, 133.9, 128.9, 128.8, 30.9.

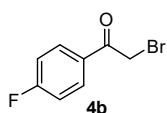

White solid; 80% yield (34.8 mg);  $^1\text{H}$  NMR (300 MHz,  $\text{CDCl}_3$ )  $\delta$  8.08–7.97 (m, 2H), 7.22–7.11 (m, 2H), 4.41 (s, 2H);  $^{13}\text{C}$  NMR (75 MHz,  $\text{CDCl}_3$ )  $\delta$  189.8, 166.1 (d,  $J = 256.7$  Hz), 131.7 (d,  $J = 9.5$  Hz), 130.3 (d,  $J = 3.0$  Hz), 116.1 (d,  $J = 22.1$  Hz), 30.4.

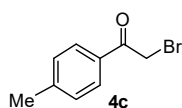

White solid; 83% yield (35.3 mg);  $^1\text{H}$  NMR (300 MHz,  $\text{CDCl}_3$ )  $\delta$  7.89 (d,  $J = 8.3$  Hz, 2H), 7.29 (d,  $J = 8.1$  Hz, 2H), 4.43 (s, 2H), 2.43 (s, 3H);  $^{13}\text{C}$  NMR (75 MHz,  $\text{CDCl}_3$ )  $\delta$  191.0, 145.0, 131.4, 129.5, 129.0, 30.9, 21.8.

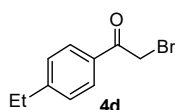

White solid; 84% yield (38.3 mg);  $^1\text{H}$  NMR (300 MHz,  $\text{CDCl}_3$ )  $\delta$  7.91 (d,  $J = 8.3$  Hz, 2H), 7.32 (d,  $J = 8.2$  Hz, 2H), 4.44 (s, 2H), 2.72 (q,  $J = 7.6$  Hz, 2H), 1.27 (t,  $J = 7.6$  Hz, 3H);  $^{13}\text{C}$  NMR (75 MHz,  $\text{CDCl}_3$ )  $\delta$  191.0, 151.1, 131.6, 129.2, 128.4, 31.0, 29.0, 15.1.

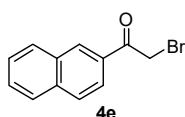

White solid; 74% yield (36.8 mg);  $^1\text{H}$  NMR (300 MHz,  $\text{CDCl}_3$ )  $\delta$  8.50 (s, 1H), 7.99 (dd,  $J = 14.5, 8.3$  Hz, 2H), 7.94–7.84 (m, 2H), 7.70–7.49 (m, 2H), 4.58 (s, 2H);  $^{13}\text{C}$  NMR (75 MHz,  $\text{CDCl}_3$ )  $\delta$  191.2, 135.8, 132.3, 131.2, 130.9, 129.6, 129.0, 128.8, 127.8, 127.0, 124.1, 31.0.

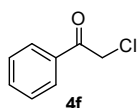

White solid; 74% yield (22.9 mg);  $^1\text{H NMR}$  (300 MHz,  $\text{CDCl}_3$ )  $\delta$  7.95 (d,  $J = 7.3$  Hz, 2H), 7.62 (t,  $J = 7.4$  Hz, 1H), 7.49 (t,  $J = 7.6$  Hz, 2H), 4.72 (s, 2H);  $^{13}\text{C NMR}$  (75 MHz,  $\text{CDCl}_3$ )  $\delta$  191.0, 134.2, 134.0, 128.9, 128.5, 46.0.

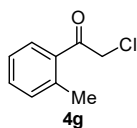

White solid; 73% yield (23.4 mg);  $^1\text{H NMR}$  (300 MHz,  $\text{CDCl}_3$ )  $\delta$  7.62 (d,  $J = 7.4$  Hz, 1H), 7.44 (t,  $J = 7.0$  Hz, 1H), 7.30 (d,  $J = 7.4$  Hz, 2H), 4.64 (s, 2H), 2.53 (s, 3H);  $^{13}\text{C NMR}$  (75 MHz,  $\text{CDCl}_3$ )  $\delta$  194.2, 139.5, 134.5, 132.4, 128.6, 125.8, 47.9, 21.4.

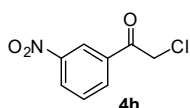

White solid; 60% yield (23.9 mg);  $^1\text{H NMR}$  (300 MHz,  $\text{CDCl}_3$ )  $\delta$  8.79 (t,  $J = 1.9$  Hz, 1H), 8.48 (ddd,  $J = 8.2, 2.1, 0.9$  Hz, 1H), 8.39–8.24 (m, 1H), 7.74 (t,  $J = 8.0$  Hz, 1H), 4.73 (s, 2H);  $^{13}\text{C NMR}$  (75 MHz,  $\text{CDCl}_3$ )  $\delta$  189.3, 148.5, 135.3, 134.1, 130.3, 128.2, 123.5, 45.4.

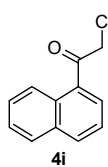

White solid; 72% yield (23.2 mg);  $^1\text{H NMR}$  (300 MHz,  $\text{CDCl}_3$ )  $\delta$  8.63 (d,  $J = 8.5$  Hz, 1H), 8.05 (d,  $J = 8.3$  Hz, 1H), 7.89 (t,  $J = 7.4$  Hz, 2H), 7.69–7.47 (m, 3H), 4.78 (s, 2H);  $^{13}\text{C NMR}$  (75 MHz,  $\text{CDCl}_3$ )  $\delta$  194.4, 134.0, 133.9, 132.4, 130.4, 128.6, 128.5, 128.2, 126.8, 125.5, 124.2, 48.0.

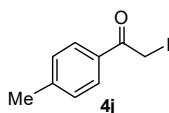

White solid; 63% yield (30.9 mg);  $^1\text{H NMR}$  (300 MHz,  $\text{CDCl}_3$ )  $\delta$  7.85 (d,  $J = 7.6$  Hz, 2H), 7.29 (d,  $J = 7.7$  Hz, 2H), 4.70 (s, 2H), 2.42 (s, 3H);  $^{13}\text{C NMR}$  (75 MHz,  $\text{CDCl}_3$ )  $\delta$  190.7, 145.1, 131.7, 129.6, 128.6, 46.0, 21.8.

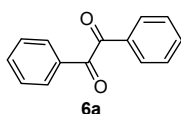

Yellow solid; 77% yield (32.4 mg);  $^1\text{H NMR}$  (300 MHz,  $\text{CDCl}_3$ )  $\delta$  7.98 (d,  $J = 7.7$  Hz, 4H), 7.66 (t,  $J = 7.3$  Hz, 2H), 7.51 (t,  $J = 7.5$  Hz, 4H);  $^{13}\text{C NMR}$  (75 MHz,  $\text{CDCl}_3$ )  $\delta$  194.6, 134.9, 132.9, 129.9, 129.0.

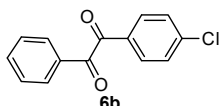

Yellow solid; 70% yield (34.3 mg);  $^1\text{H NMR}$  (300 MHz,  $\text{CDCl}_3$ )  $\delta$  7.95 (dd,  $J = 11.5, 8.6$  Hz, 4H), 7.67 (t,  $J = 7.4$  Hz, 1H), 7.51 (dd,  $J = 12.3, 7.9$  Hz, 4H);  $^{13}\text{C NMR}$  (75 MHz,  $\text{CDCl}_3$ )  $\delta$  193.9, 193.1, 141.6, 135.1, 132.8, 131.3, 131.2, 129.9, 129.4, 129.1.

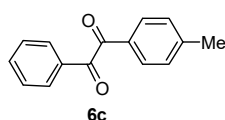

Yellow solid; 68% yield (30.5 mg);  $^1\text{H NMR}$  (300 MHz,  $\text{CDCl}_3$ )  $\delta$  7.97 (d,  $J = 7.8$  Hz, 2H), 7.87 (d,  $J = 7.7$  Hz, 2H), 7.66 (t,  $J = 7.4$  Hz, 1H), 7.51 (t,  $J = 7.4$  Hz, 2H), 7.31 (d,  $J = 7.7$  Hz, 2H), 2.44 (s, 3H);  $^{13}\text{C NMR}$  (75 MHz,  $\text{CDCl}_3$ )  $\delta$  194.8, 194.3, 146.3, 134.8, 132.9, 130.4, 130.0, 129.9, 129.7, 129.0, 22.0.

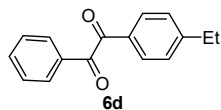

Yellow solid; 56% yield (26.7 mg);  $^1\text{H NMR}$  (300 MHz,  $\text{CDCl}_3$ )  $\delta$  7.97 (d,  $J = 7.8$  Hz, 2H), 7.89 (d,  $J = 7.8$  Hz, 2H), 7.65 (t,  $J = 7.0$  Hz, 1H), 7.51 (t,  $J = 7.5$  Hz, 2H), 7.33 (d,  $J = 7.9$  Hz, 2H), 2.72 (q,  $J = 7.6$  Hz, 2H), 1.25 (t,  $J = 7.5$  Hz, 3H);  $^{13}\text{C NMR}$  (75 MHz,  $\text{CDCl}_3$ )  $\delta$  194.8, 194.4, 152.4, 134.8, 132.9, 130.6, 130.1, 129.9, 129.0, 128.6, 29.2, 15.1.

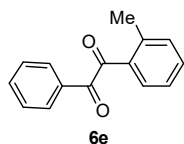

Yellow solid; 73% yield (32.7 mg);  $^1\text{H NMR}$  (300 MHz,  $\text{CDCl}_3$ )  $\delta$  7.94 (d,  $J = 7.5$  Hz, 2H), 7.62 (t,  $J = 7.6$  Hz, 2H), 7.47 (dd,  $J = 14.5, 7.2$  Hz, 3H), 7.31 (d,  $J = 7.5$  Hz, 1H), 7.23 (s, 1H), 2.68 (s, 3H);  $^{13}\text{C NMR}$  (75 MHz,  $\text{CDCl}_3$ )  $\delta$  196.8, 194.8, 141.4, 134.7, 133.8, 133.1, 133.0, 132.6, 131.8, 129.9, 129.0, 126.0, 21.9.

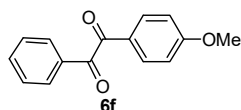

Yellow oil; 70% yield (33.6 mg);  $^1\text{H NMR}$  (300 MHz,  $\text{CDCl}_3$ )  $\delta$  7.96 (t,  $J = 7.2$  Hz, 4H), 7.65 (t,  $J = 7.3$  Hz, 1H), 7.50 (t,  $J = 7.4$  Hz, 2H), 6.97 (d,  $J = 8.5$  Hz, 2H), 3.88 (s, 3H);  $^{13}\text{C NMR}$  (75 MHz,  $\text{CDCl}_3$ )  $\delta$  194.9, 193.2, 164.9, 134.8, 133.0, 132.4, 129.9, 128.9, 125.9, 114.3, 55.6.

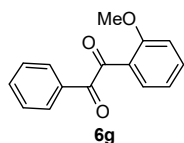

Yellow solid; 71% yield (34.1 mg);  $^1\text{H NMR}$  (300 MHz,  $\text{CDCl}_3$ )  $\delta$  8.03 (d,  $J = 7.7$  Hz, 1H), 7.92 (d,  $J = 7.6$  Hz, 2H), 7.61 (d,  $J = 6.1$  Hz, 2H), 7.50 (t,  $J = 7.4$  Hz, 2H), 7.13 (t,  $J = 7.5$  Hz, 1H), 6.94 (d,  $J = 8.4$  Hz, 1H), 3.56 (s, 3H);  $^{13}\text{C NMR}$  (75 MHz,  $\text{CDCl}_3$ )  $\delta$  194.7, 193.5, 160.4, 136.5, 133.8, 132.8, 130.5, 129.3, 128.7, 123.6, 121.5, 112.3, 55.6.

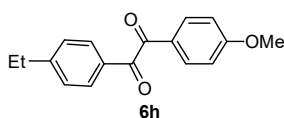

Yellow solid; 73% yield (39.2 mg);  $^1\text{H NMR}$  (300 MHz,  $\text{CDCl}_3$ )  $\delta$  7.91 (dd,  $J = 15.9, 8.1$  Hz, 4H), 7.32 (d,  $J = 7.9$  Hz, 2H), 6.97 (d,  $J = 8.3$  Hz, 2H), 3.88 (s, 3H), 2.72 (q,  $J = 7.5$  Hz, 2H), 1.25 (t,  $J = 7.5$  Hz, 3H);  $^{13}\text{C NMR}$

NMR (75 MHz, CDCl<sub>3</sub>)  $\delta$  194.7, 193.4, 164.8, 152.1, 132.4, 130.8, 130.1, 128.5, 126.1, 114.3, 55.6, 29.1, 15.1.

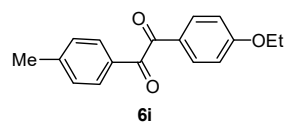

Yellow solid; 61% yield (32.7 mg); <sup>1</sup>H NMR (300 MHz, CDCl<sub>3</sub>)  $\delta$  7.89 (dd,  $J$  = 18.1, 7.9 Hz, 4H), 7.29 (d,  $J$  = 7.7 Hz, 2H), 6.94 (d,  $J$  = 8.3 Hz, 2H), 4.11 (q,  $J$  = 6.7 Hz, 2H), 2.43 (s, 3H), 1.44 (t,  $J$  = 6.8 Hz, 3H); <sup>13</sup>C NMR (75 MHz, CDCl<sub>3</sub>)  $\delta$  194.7, 193.4, 164.3, 146.0, 132.4, 130.8, 130.0, 129.6, 126.0, 114.7, 64.0, 21.9, 14.6.

10.  $^1\text{H}$  and  $^{13}\text{C}$  NMR spectra of products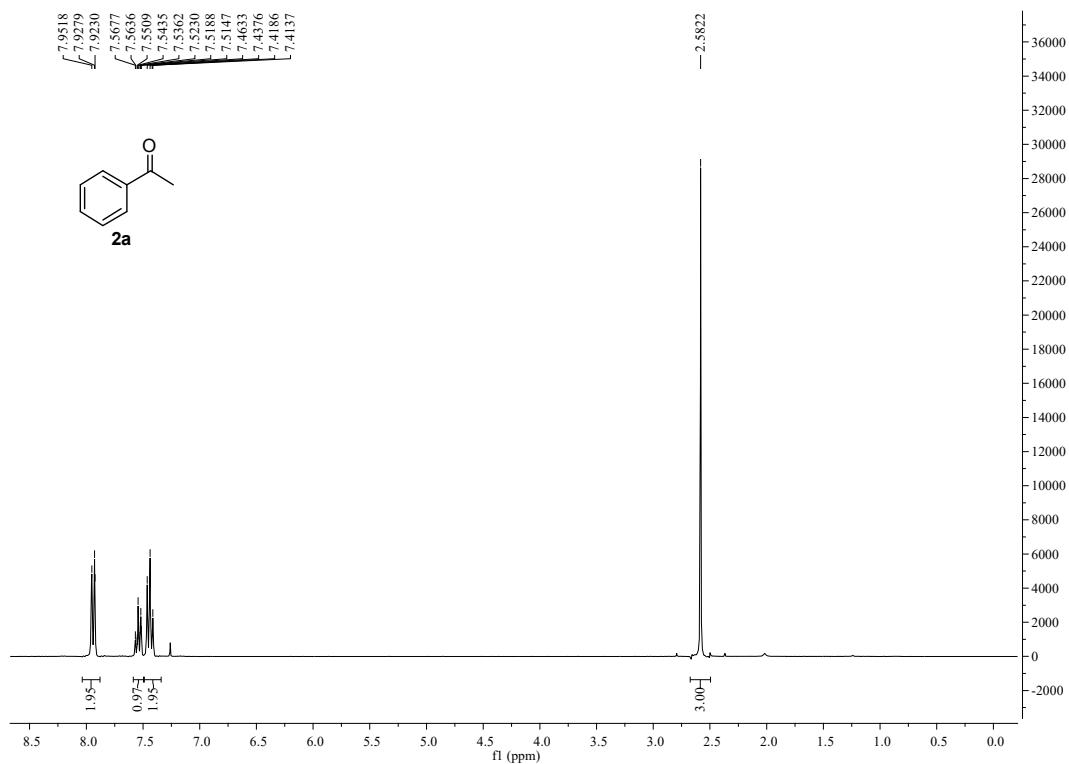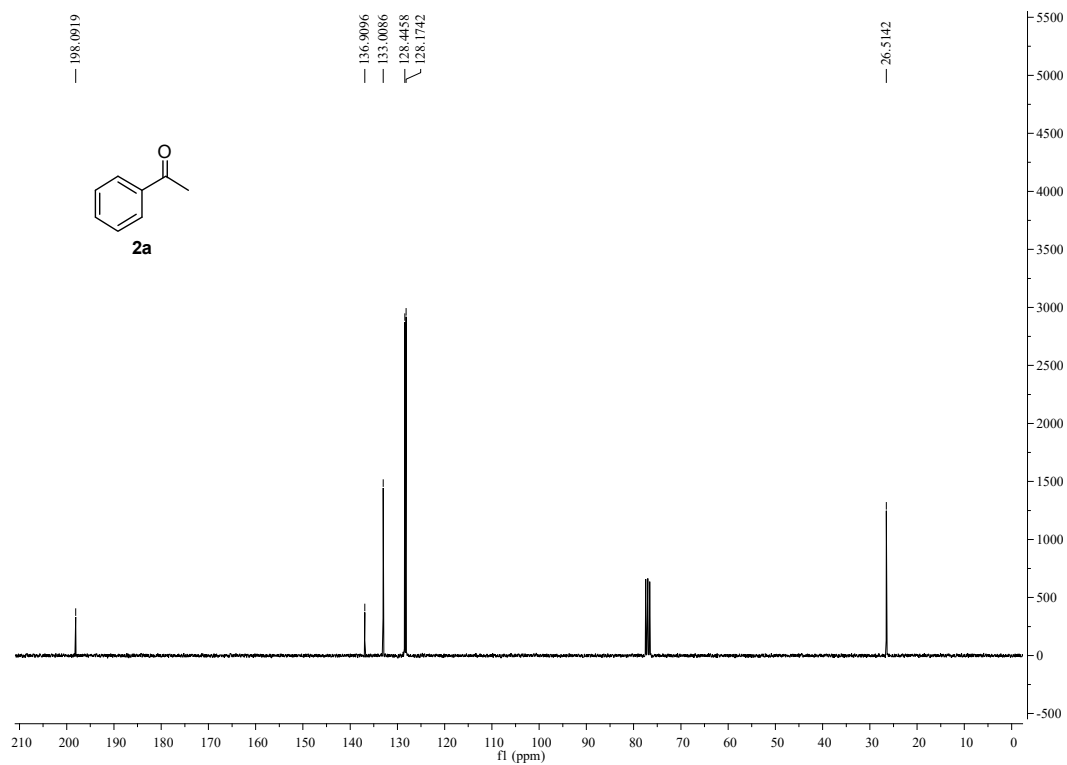

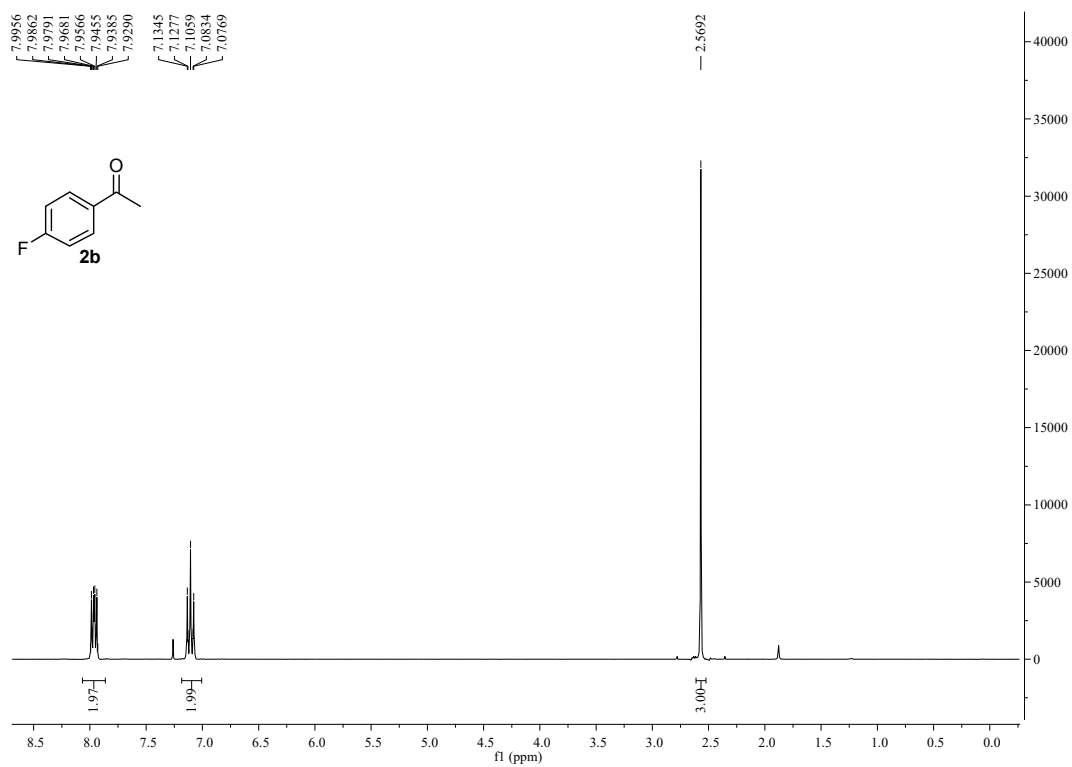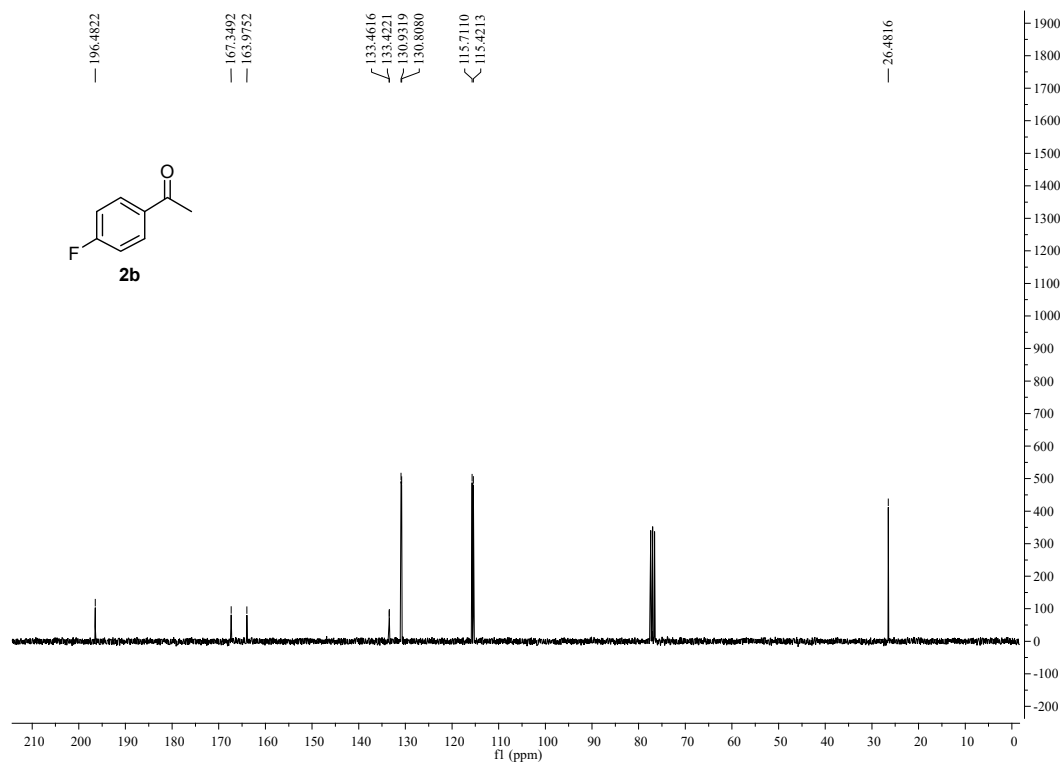

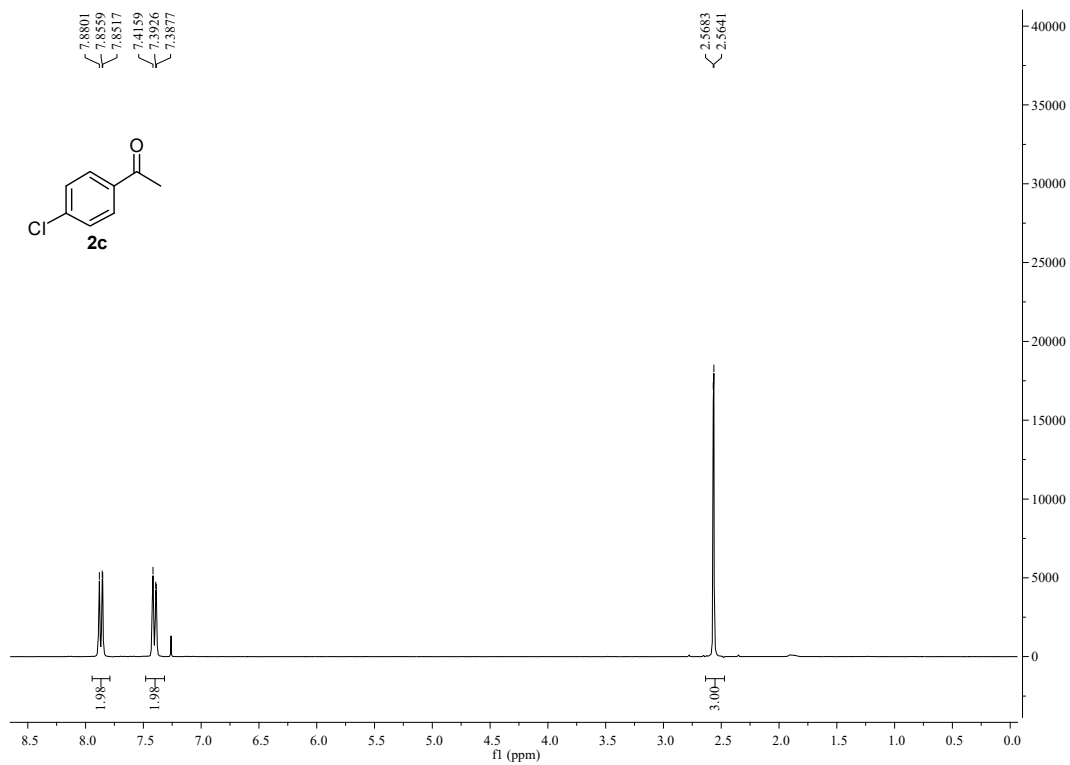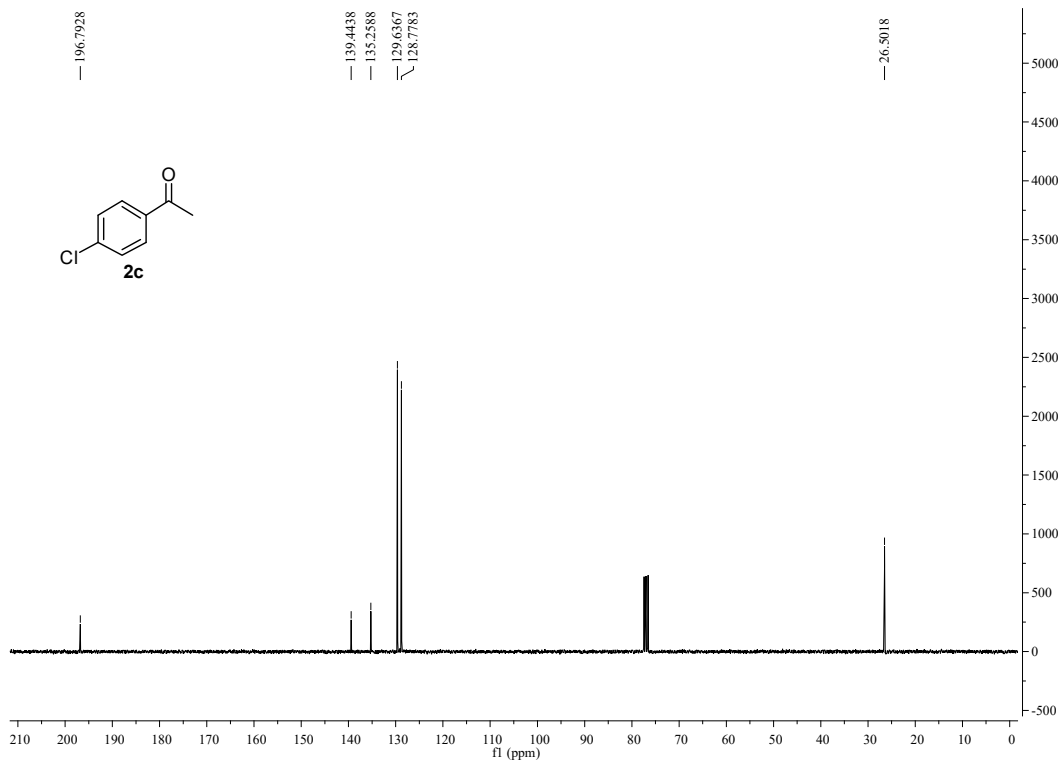



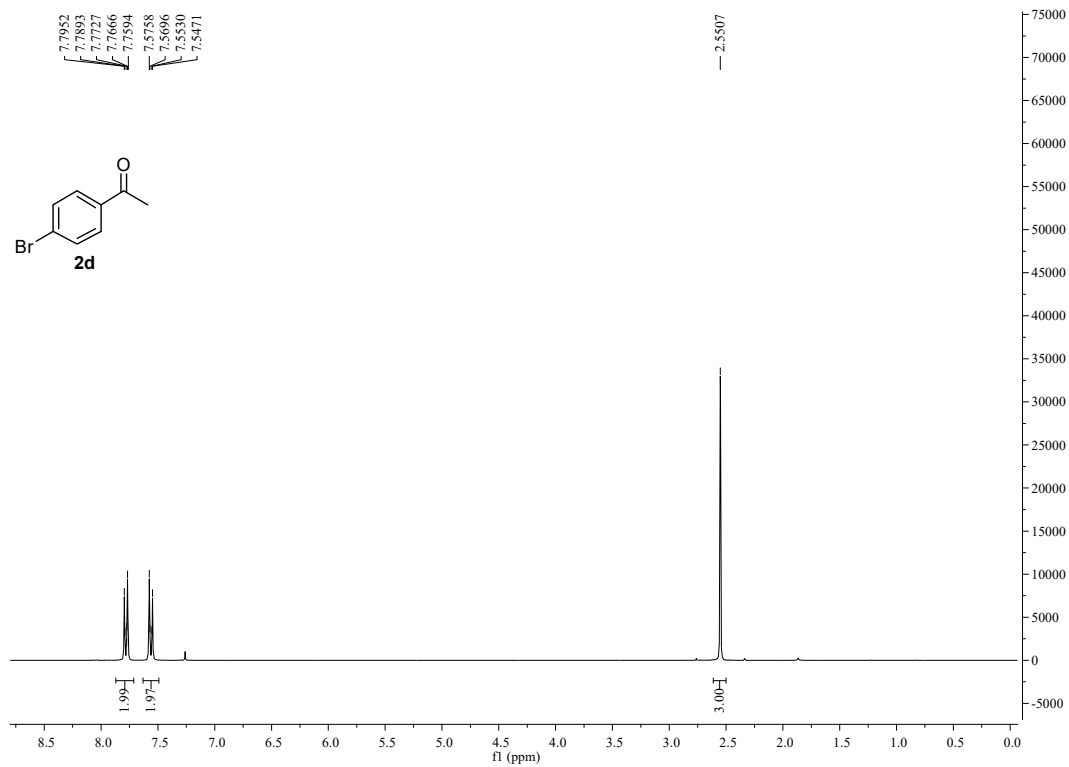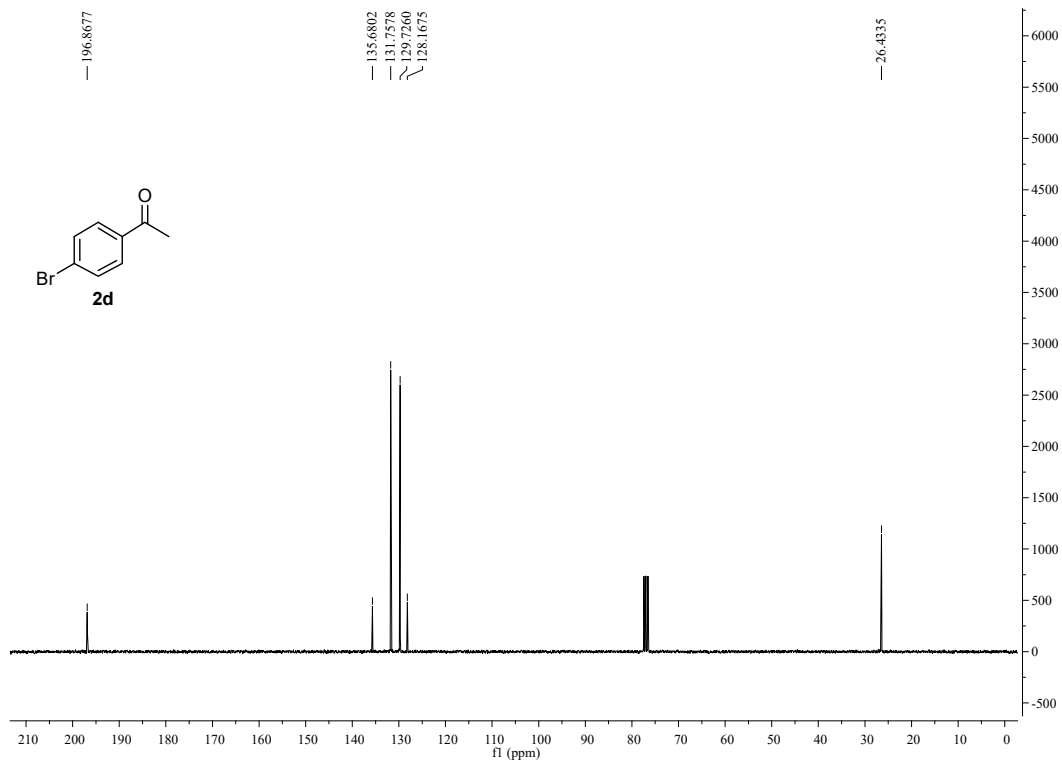

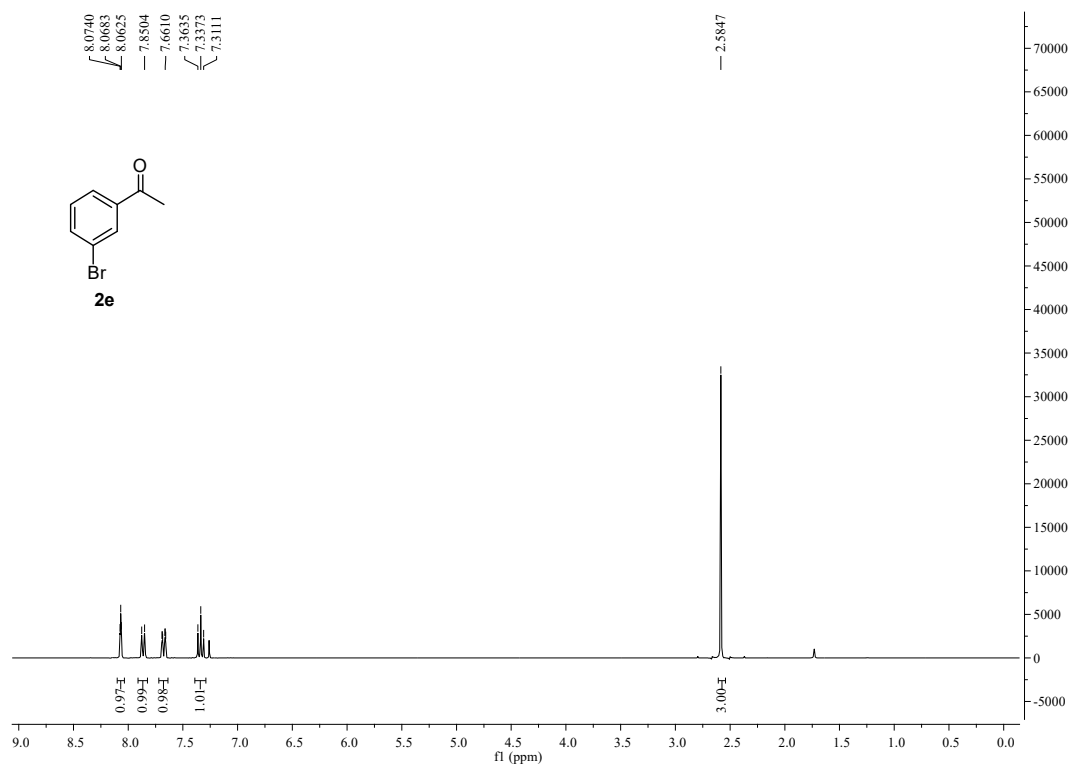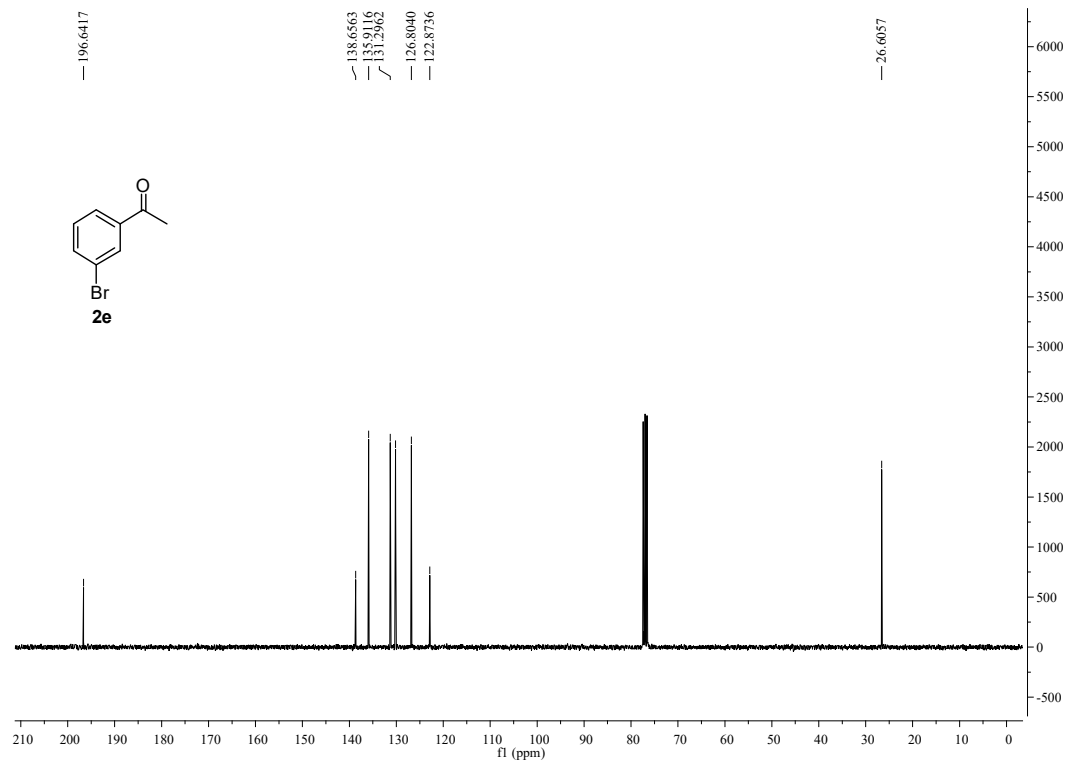

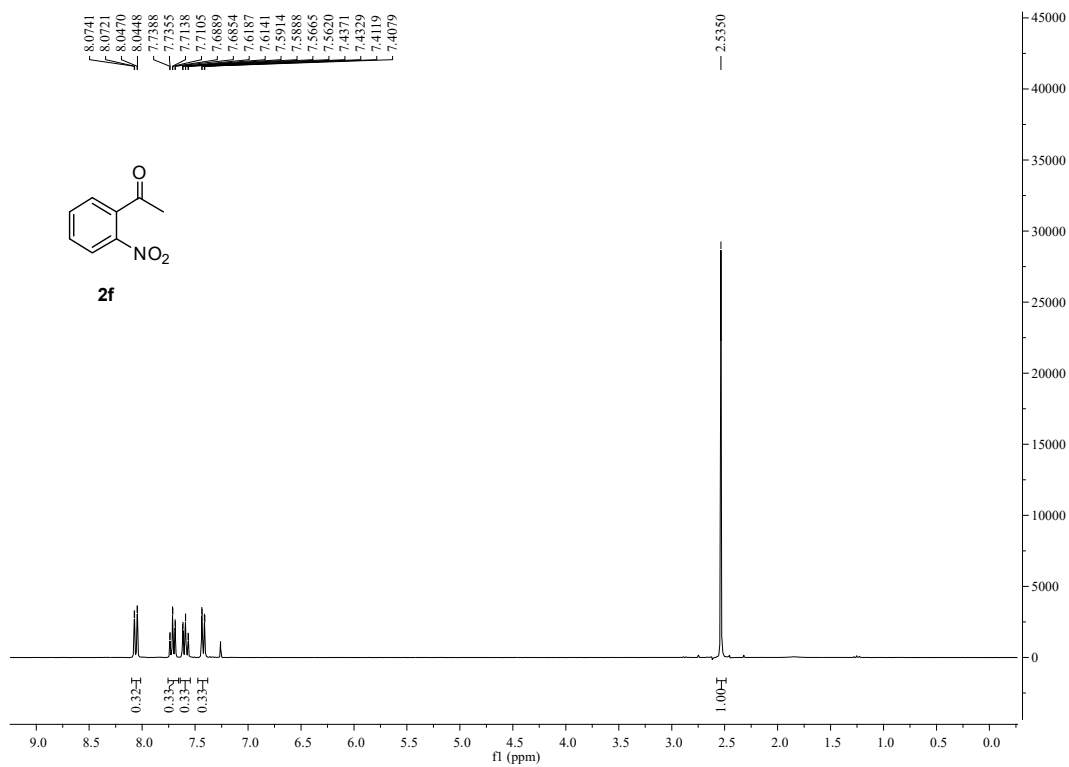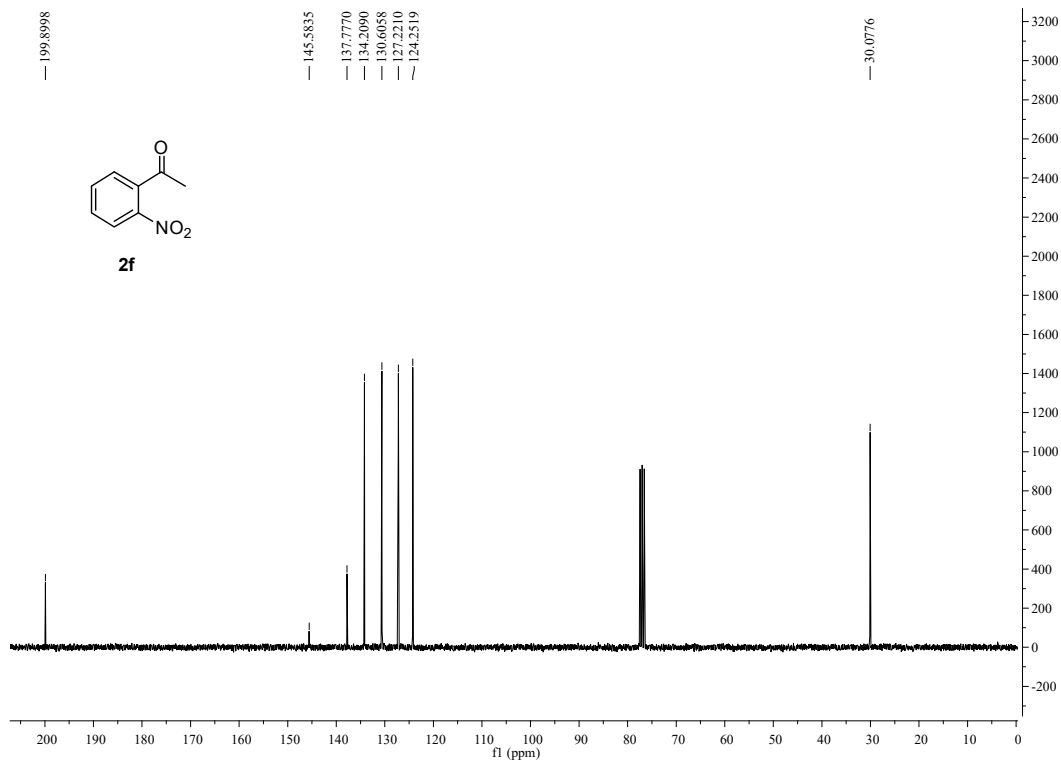

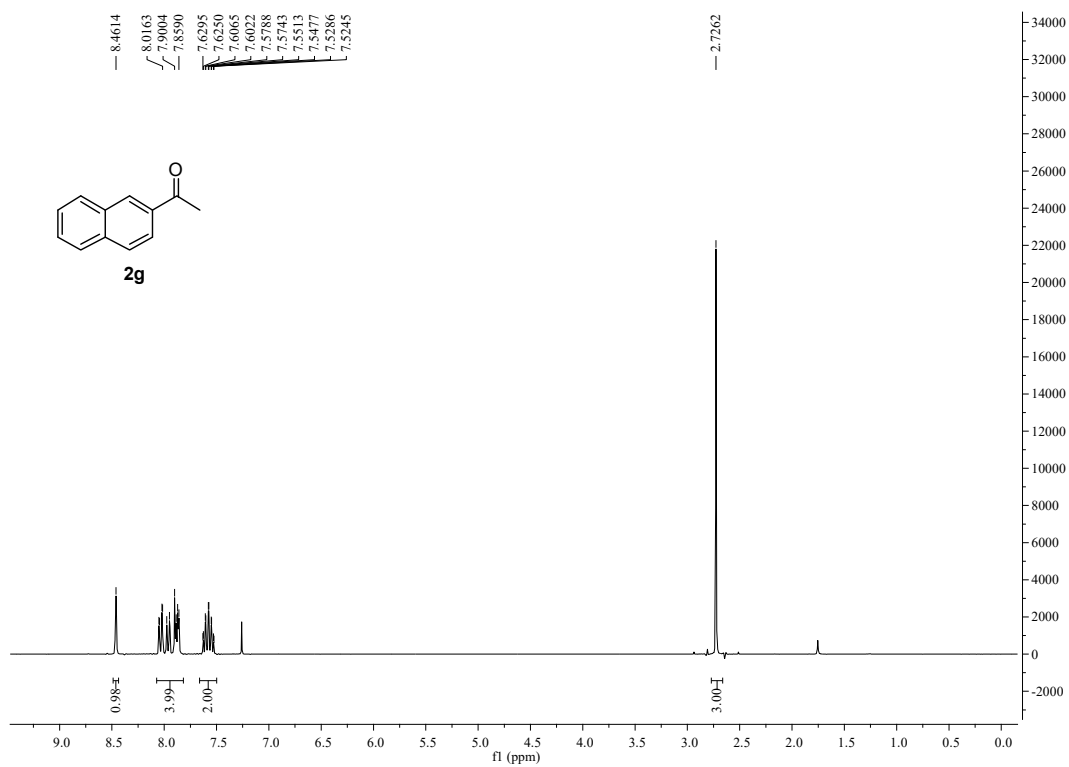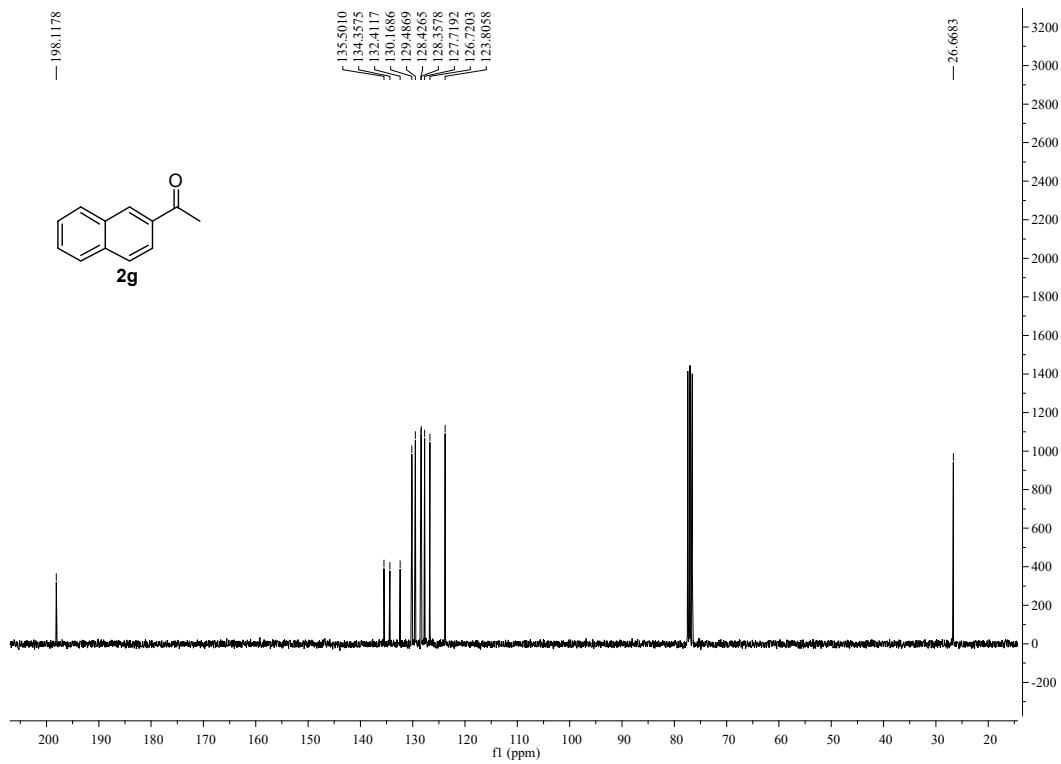

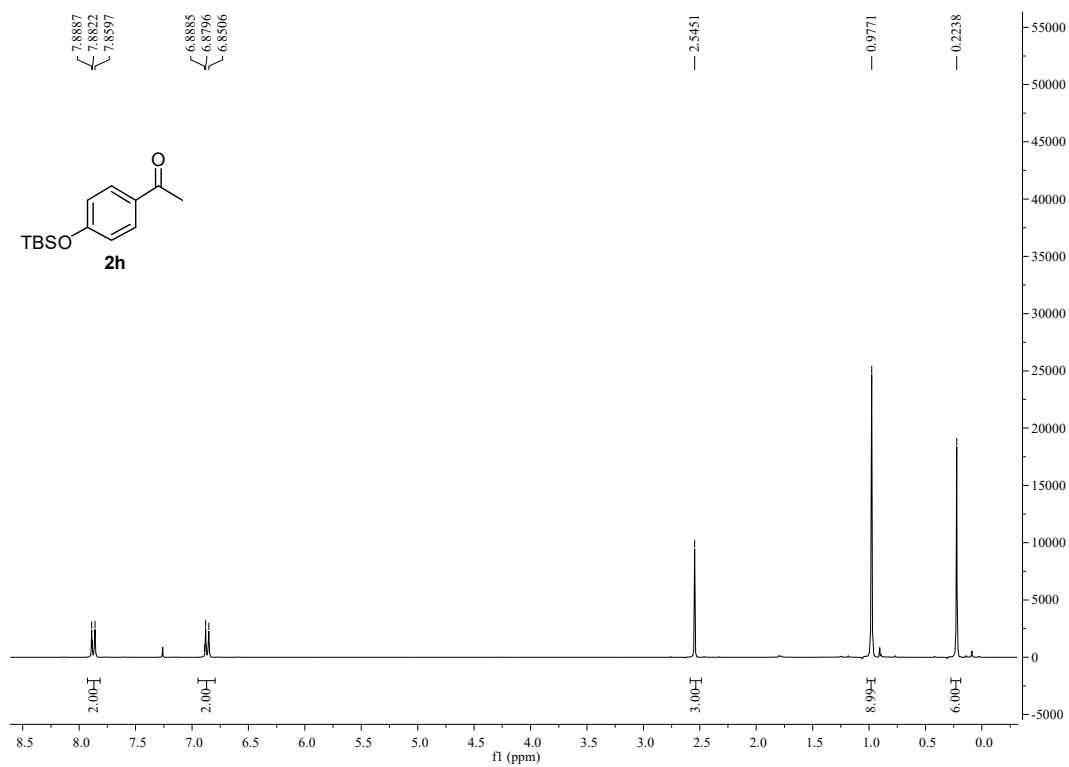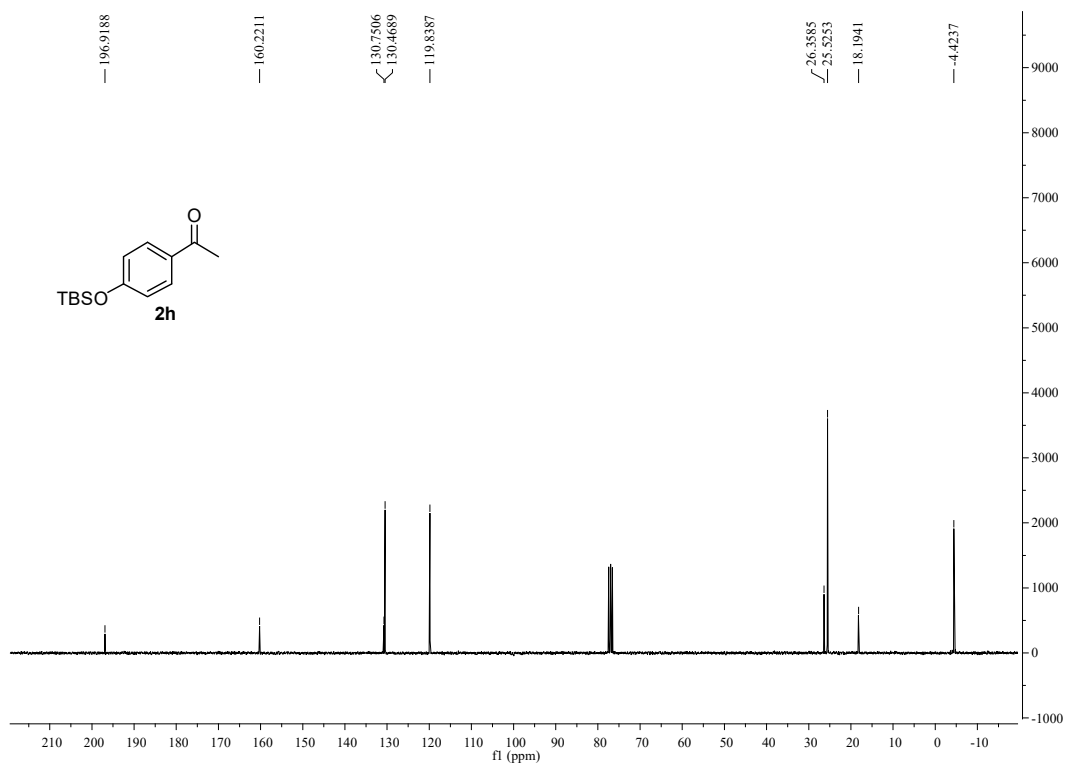

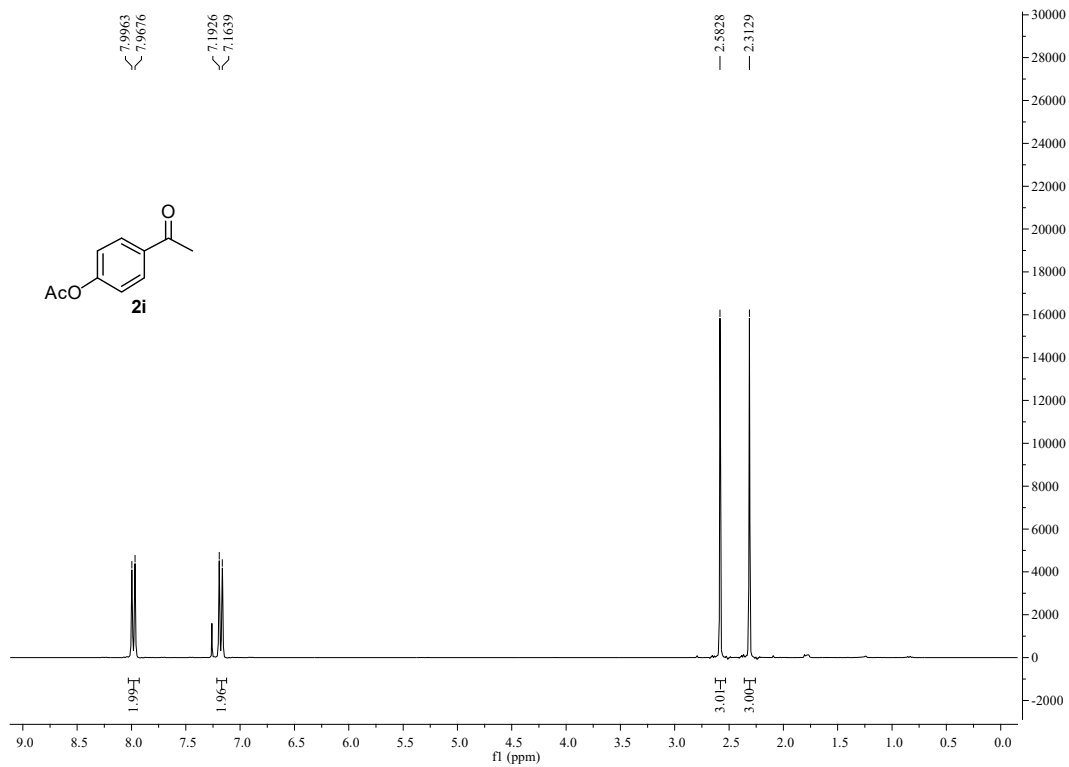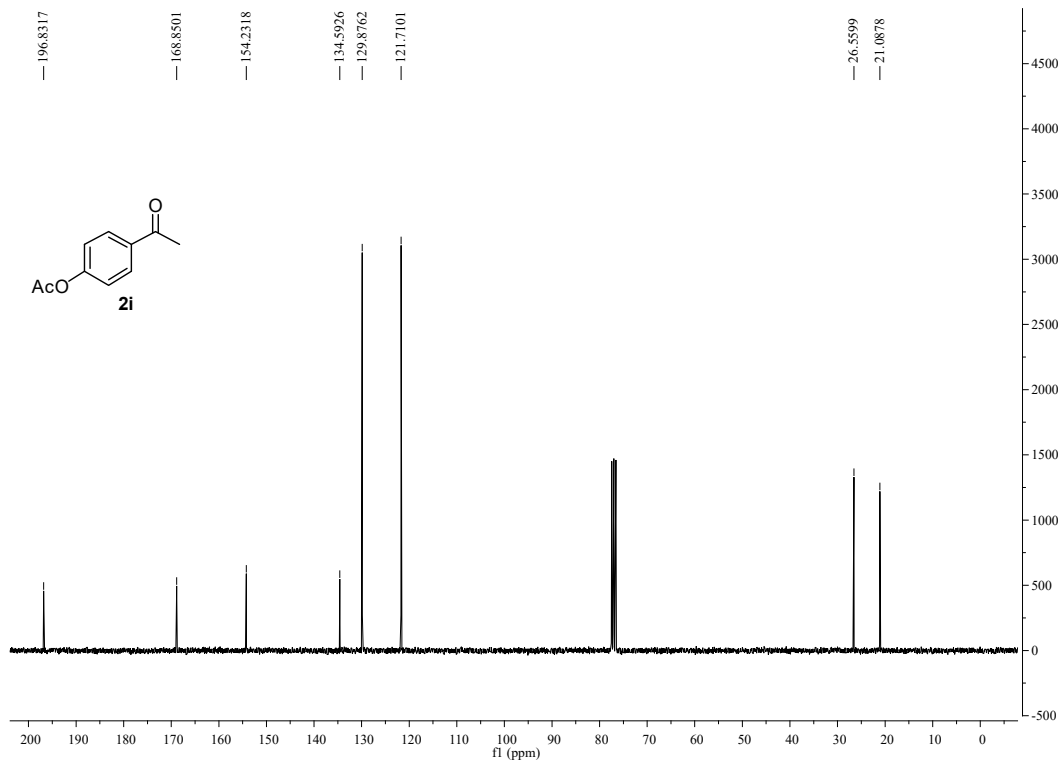

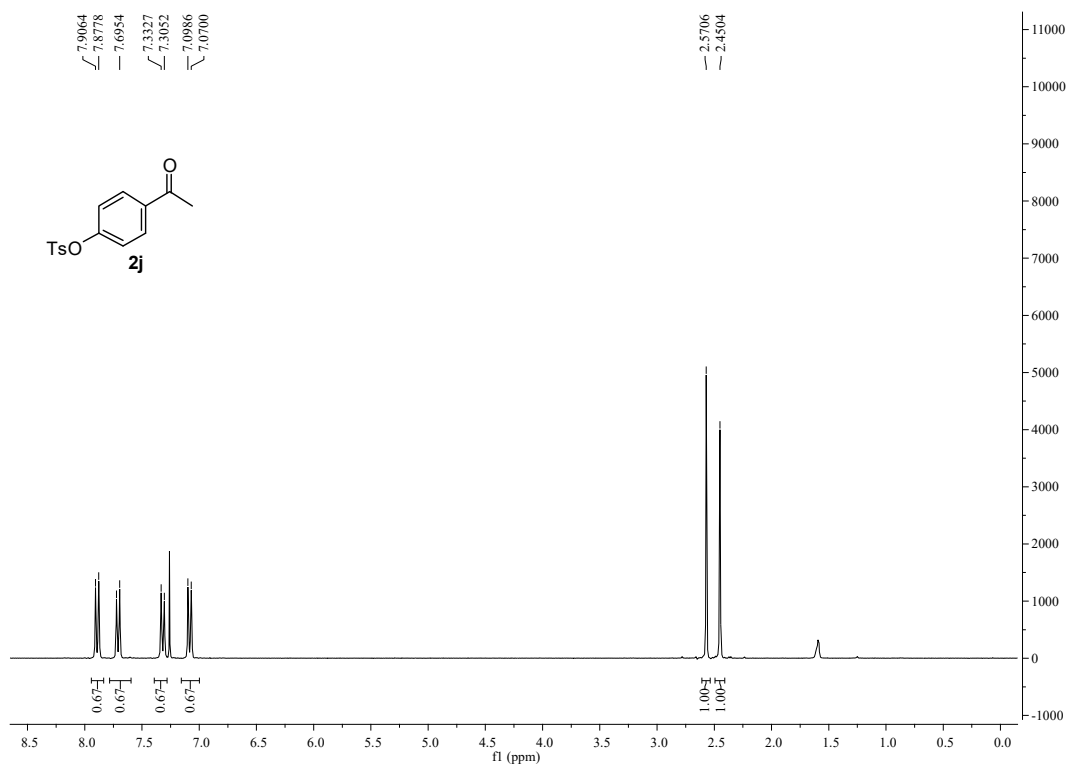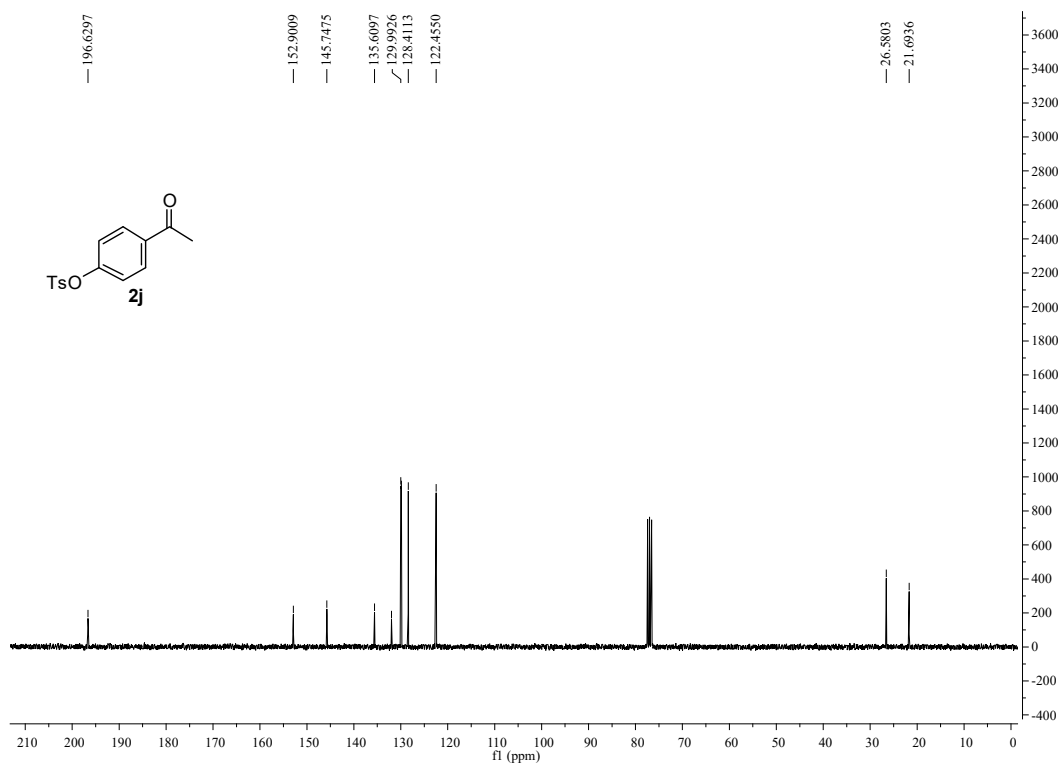

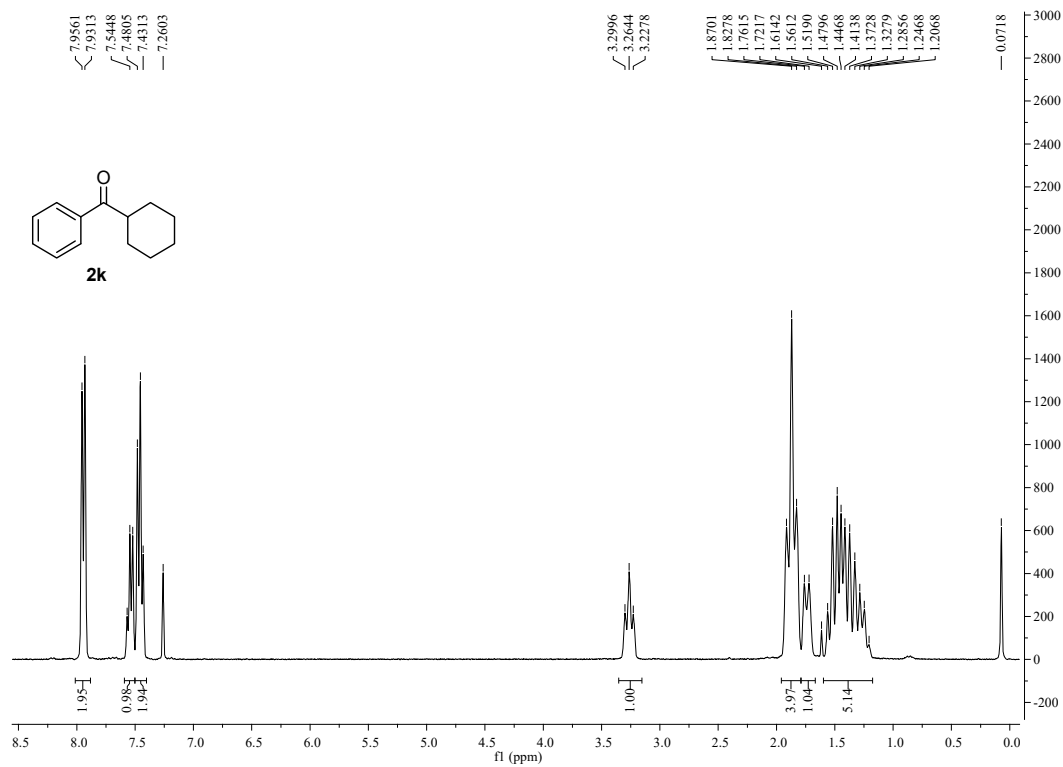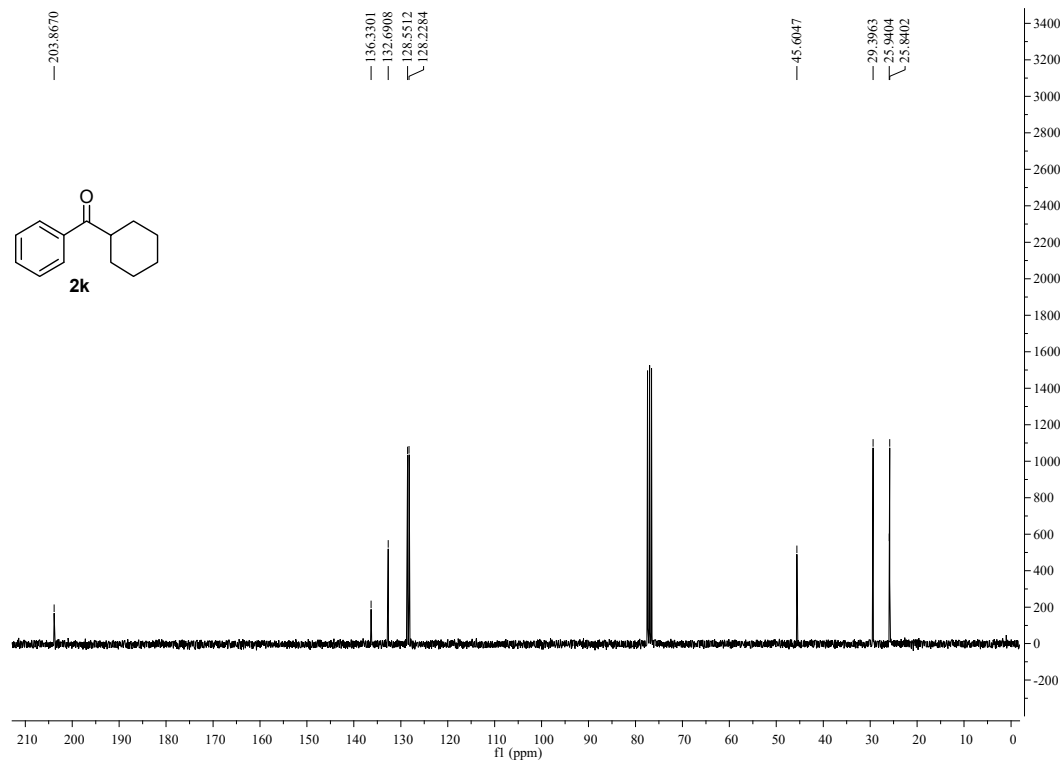



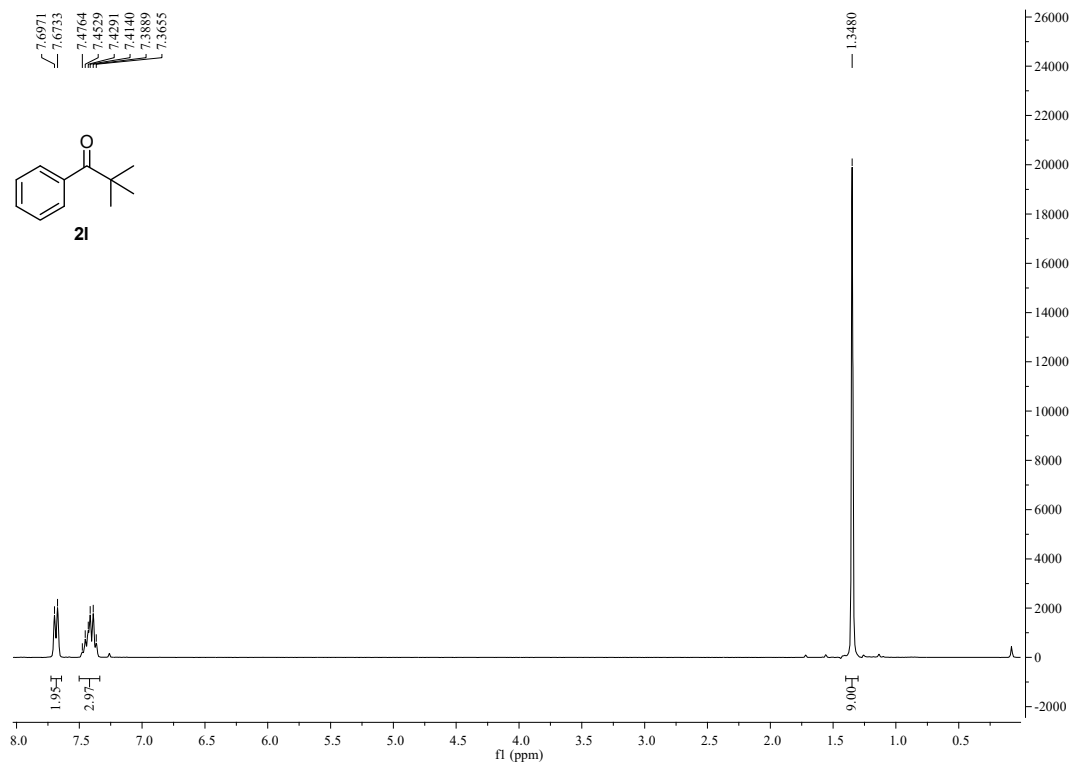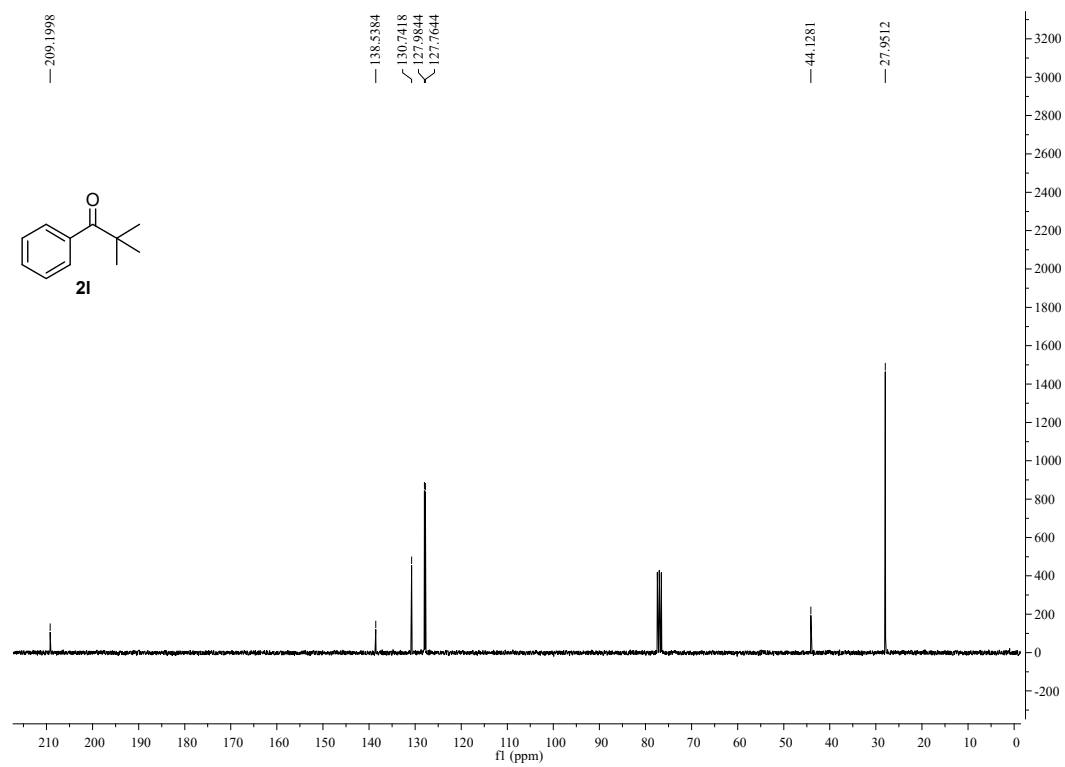

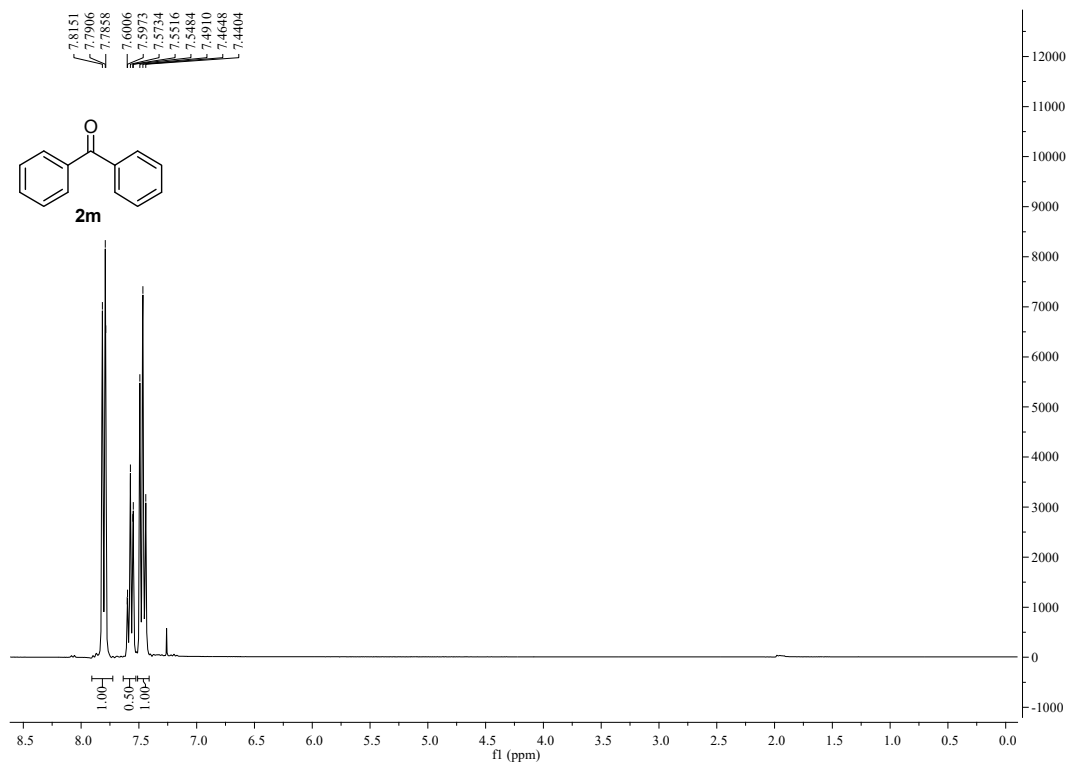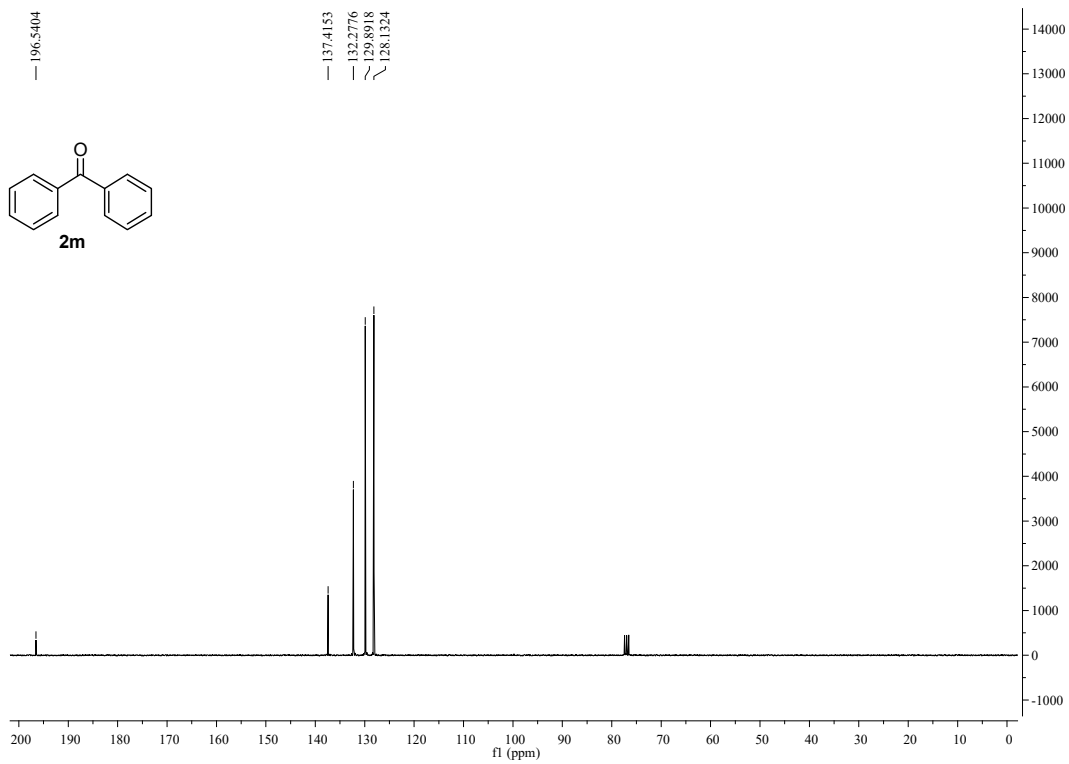

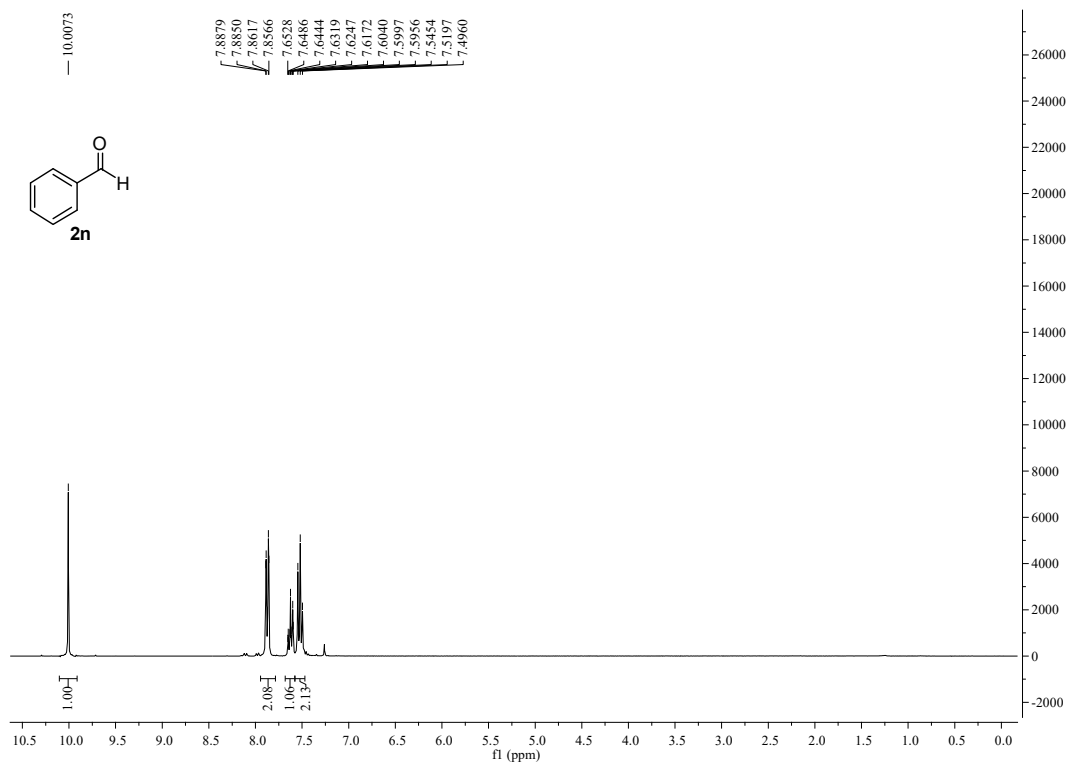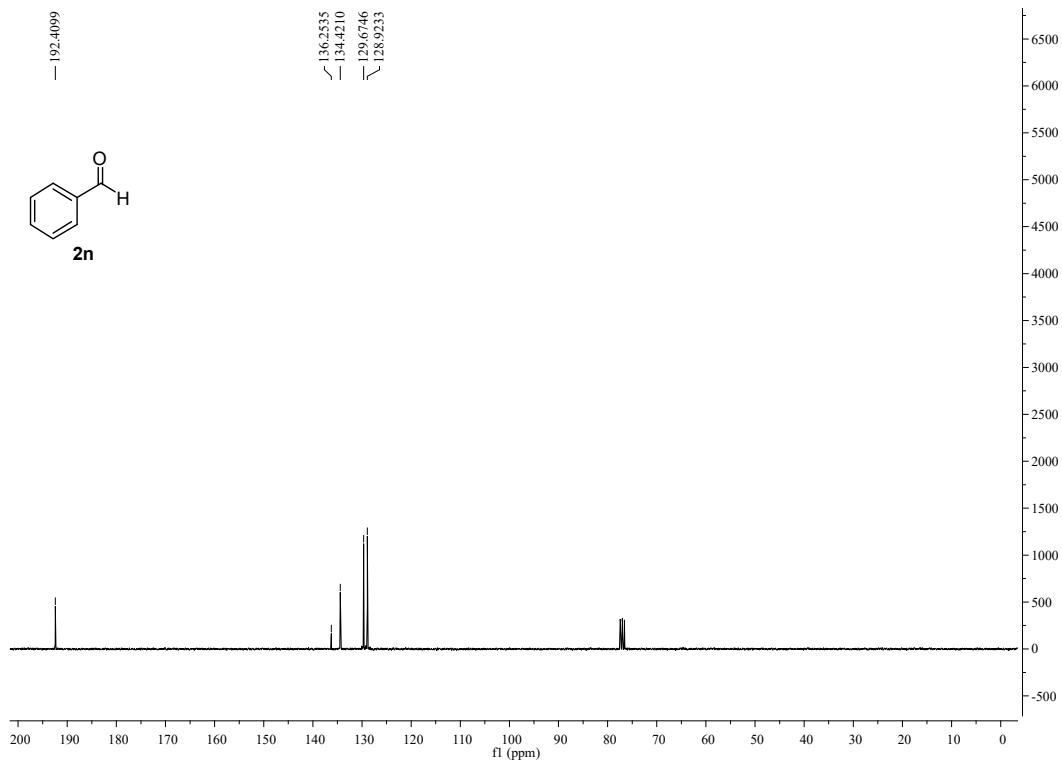

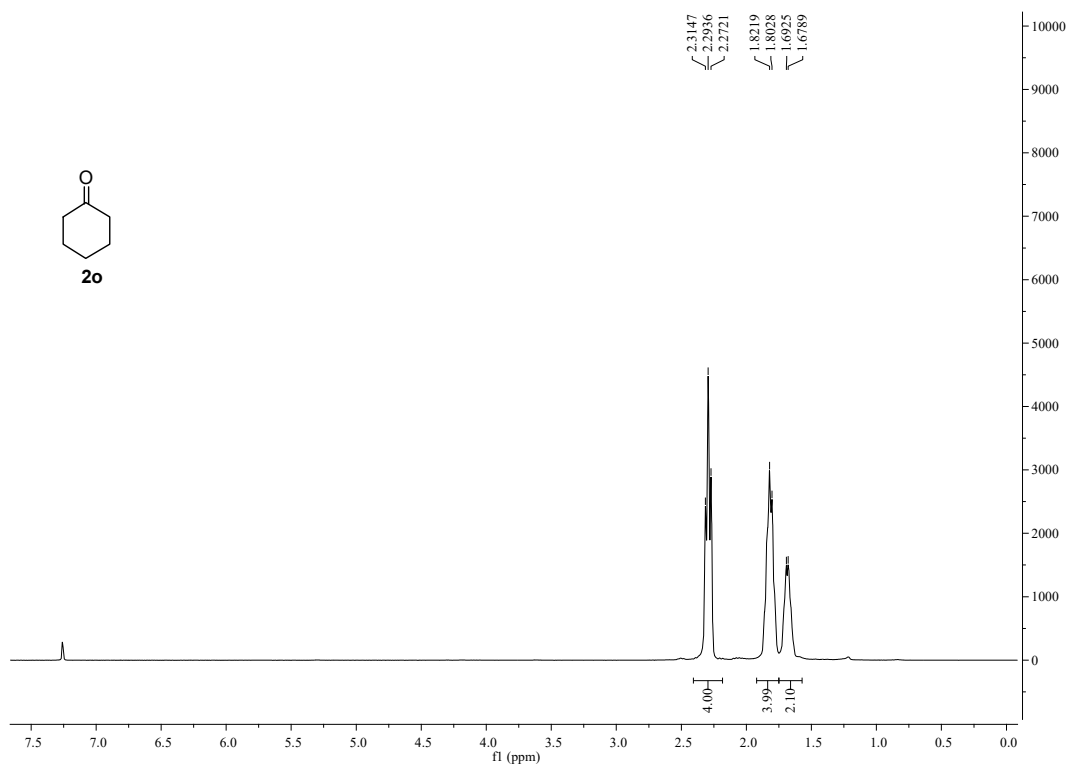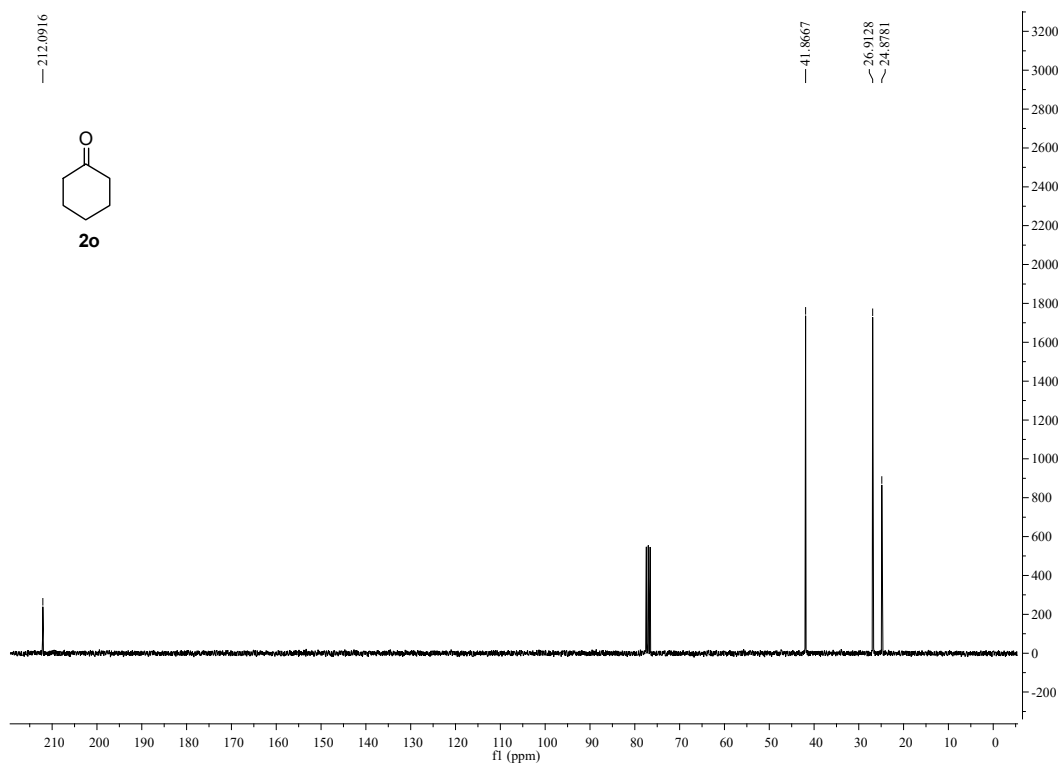

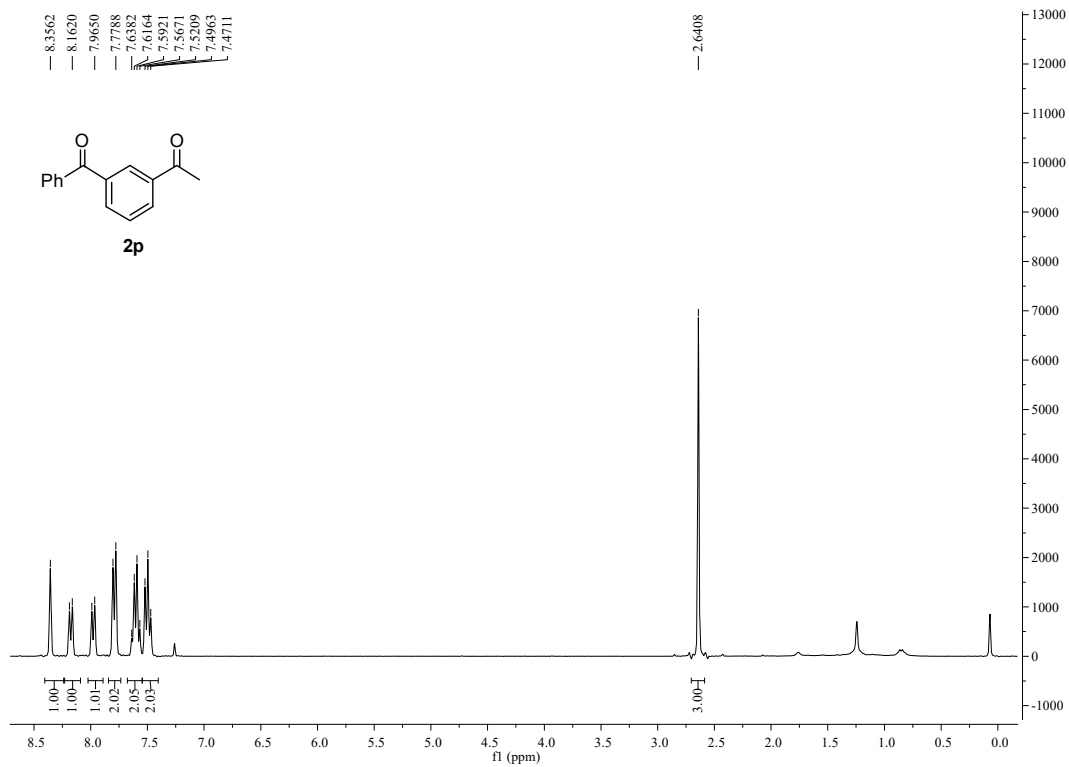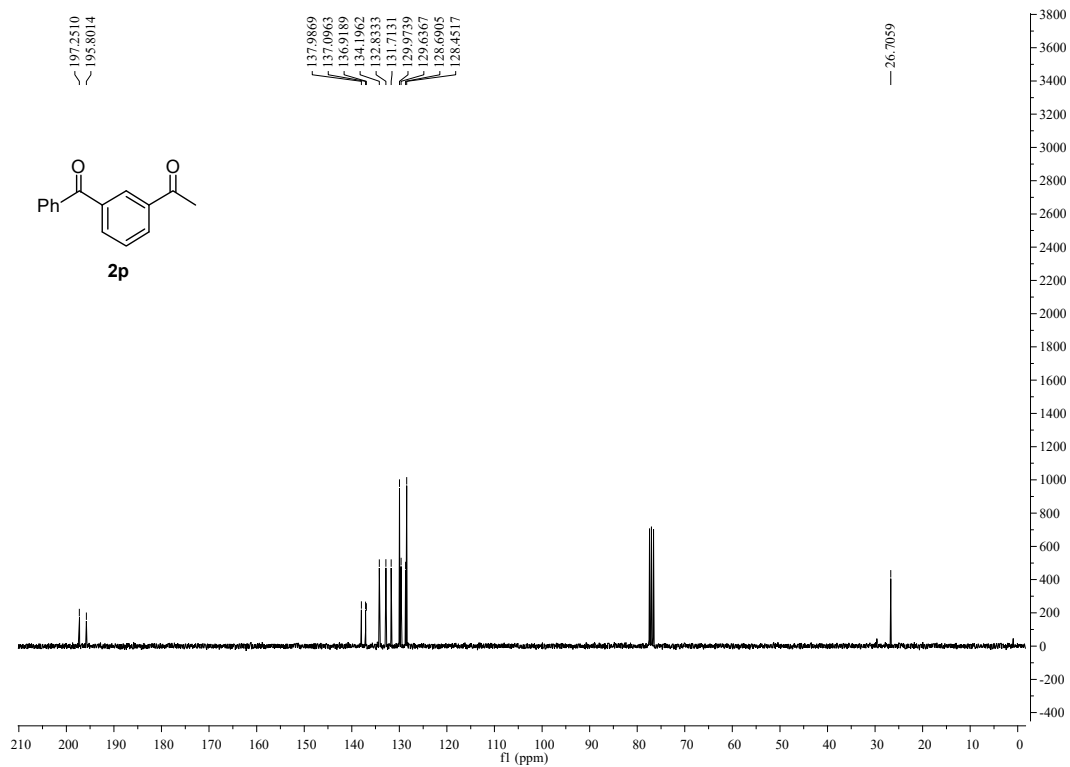

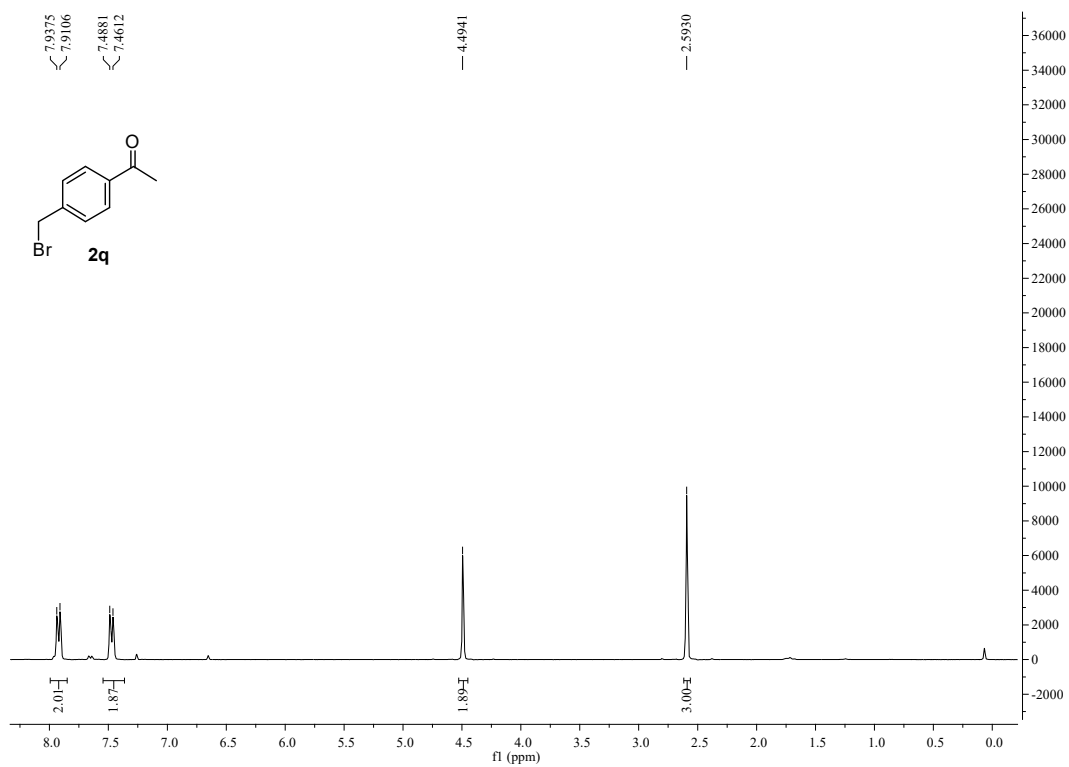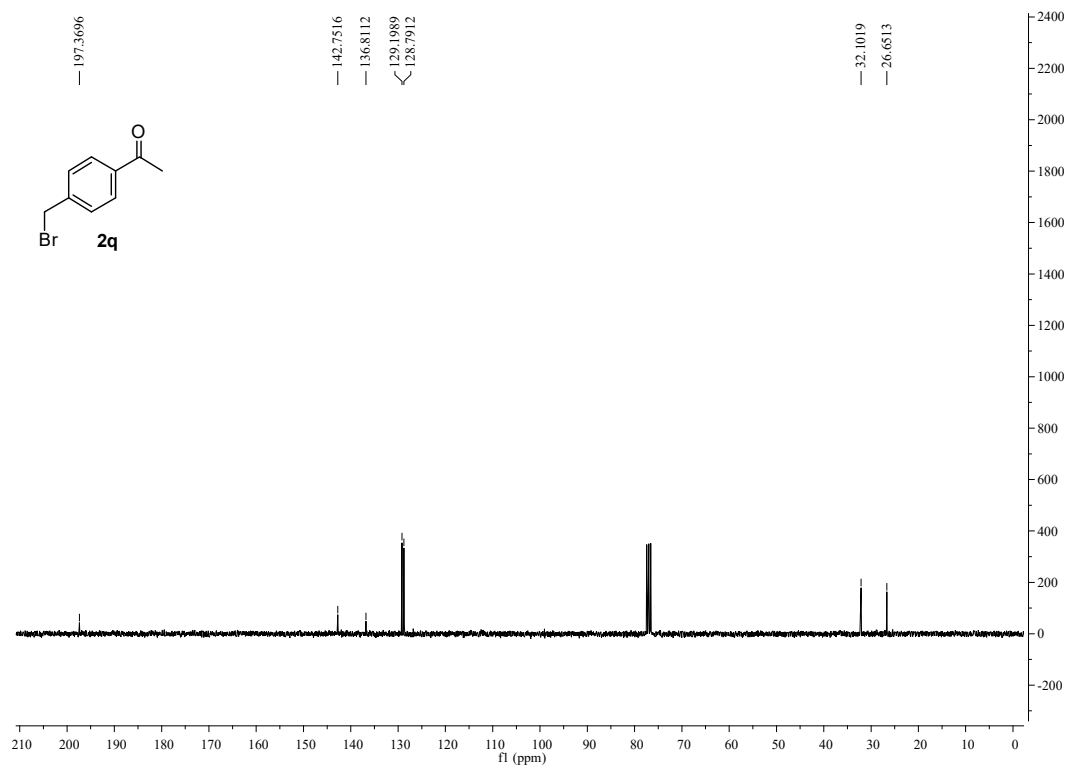

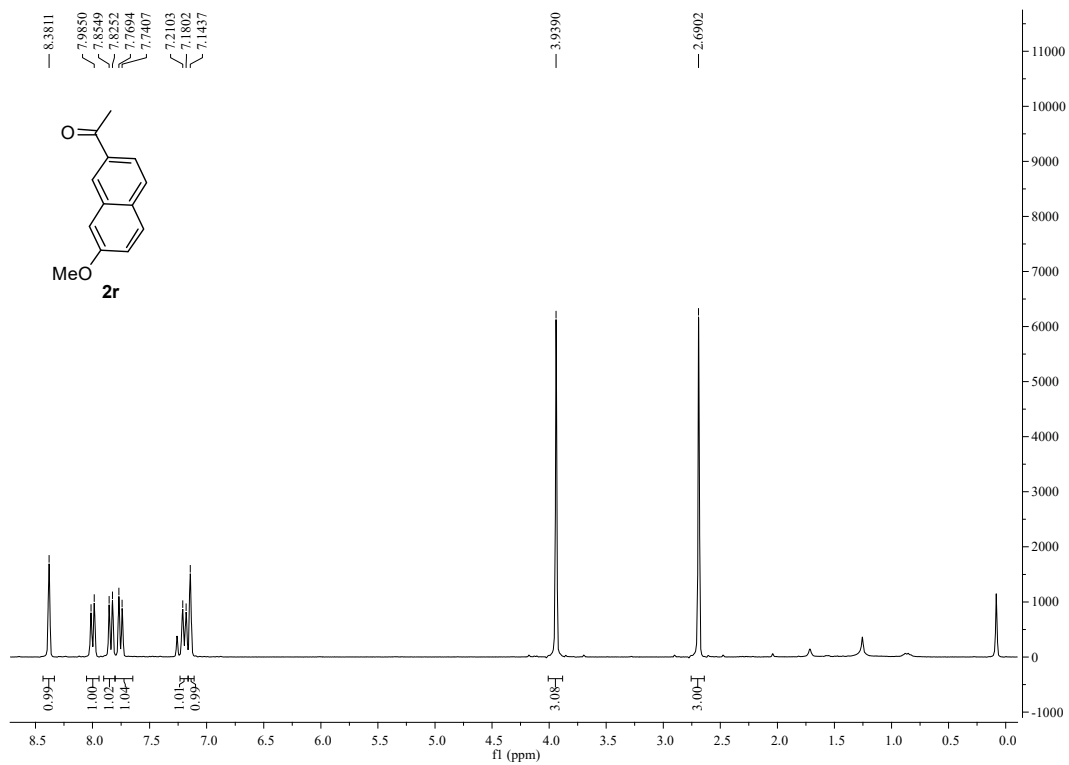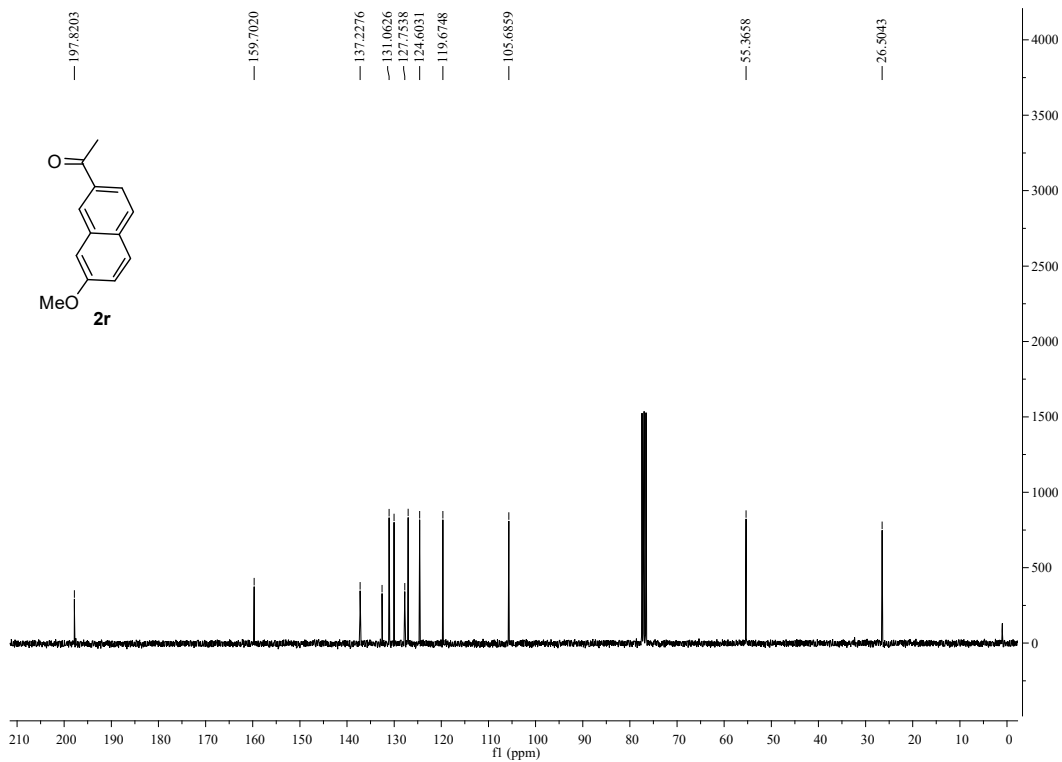

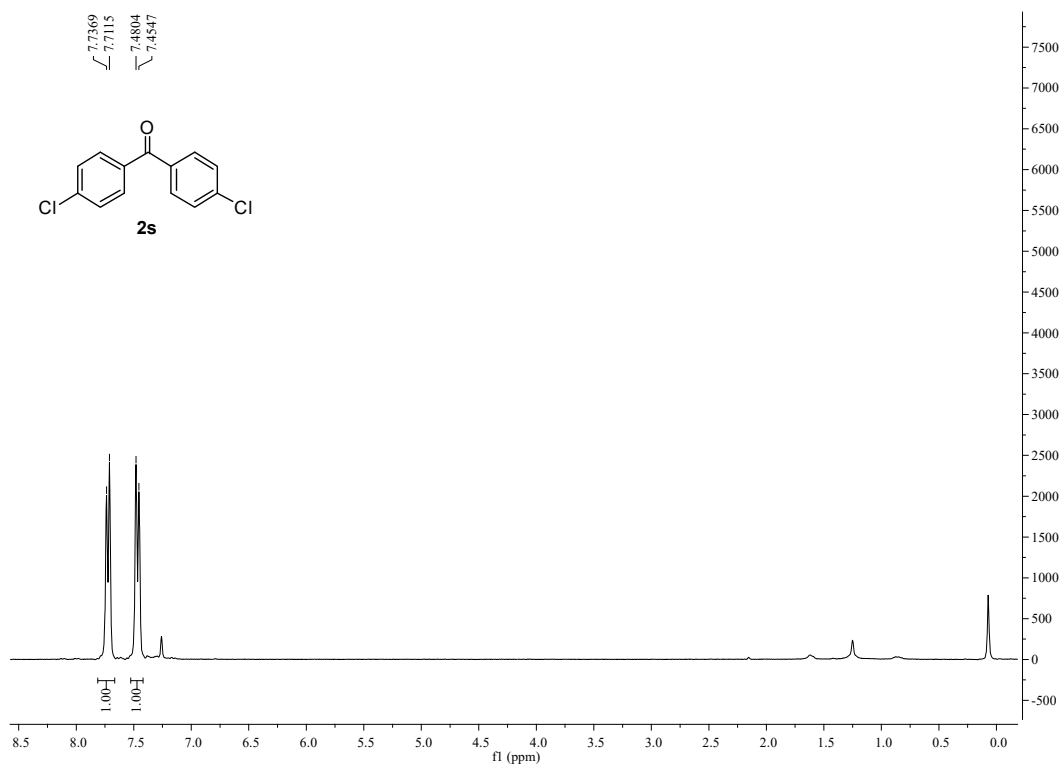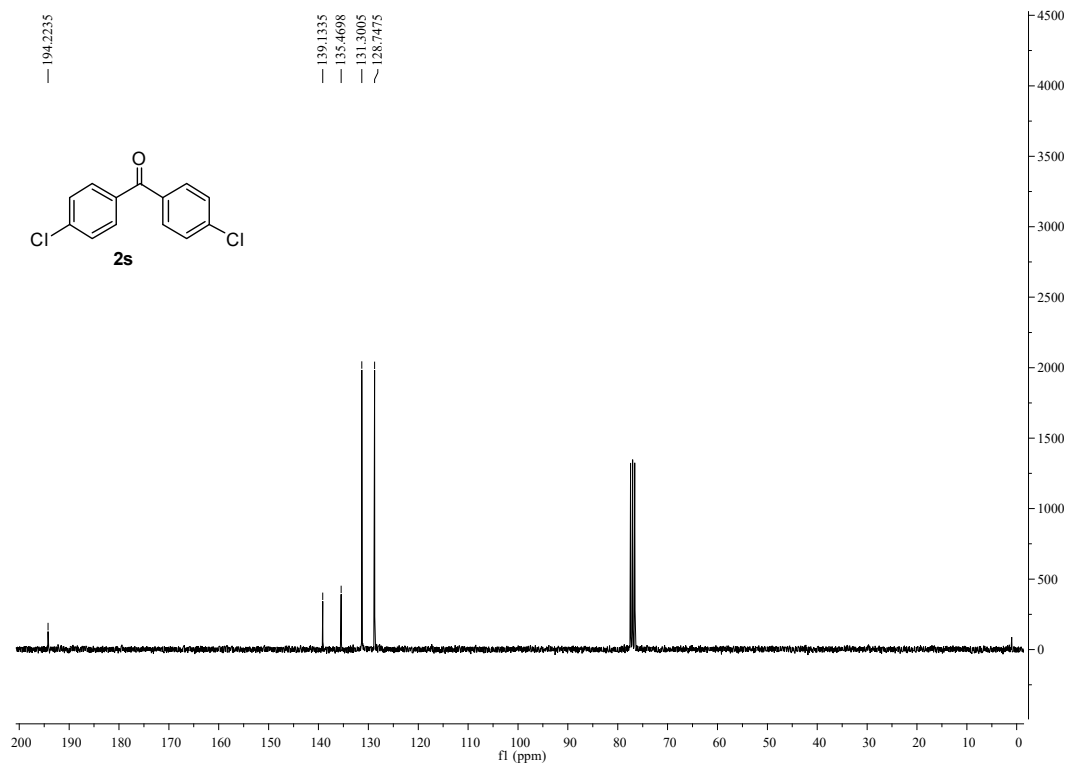



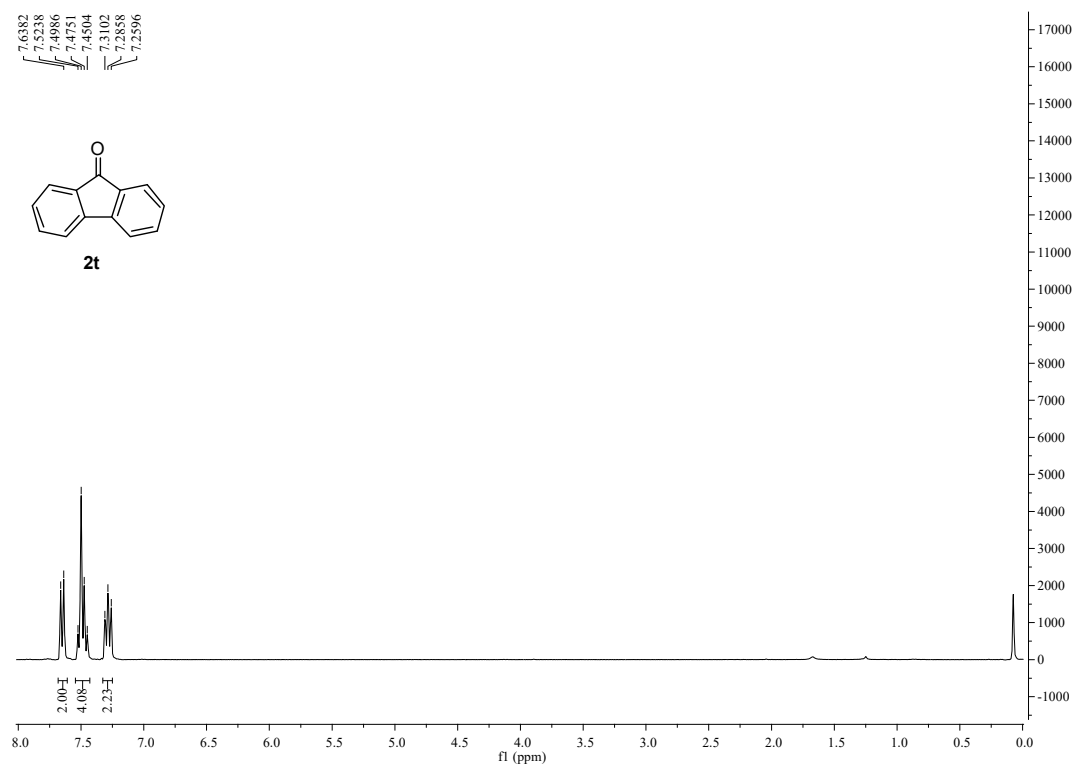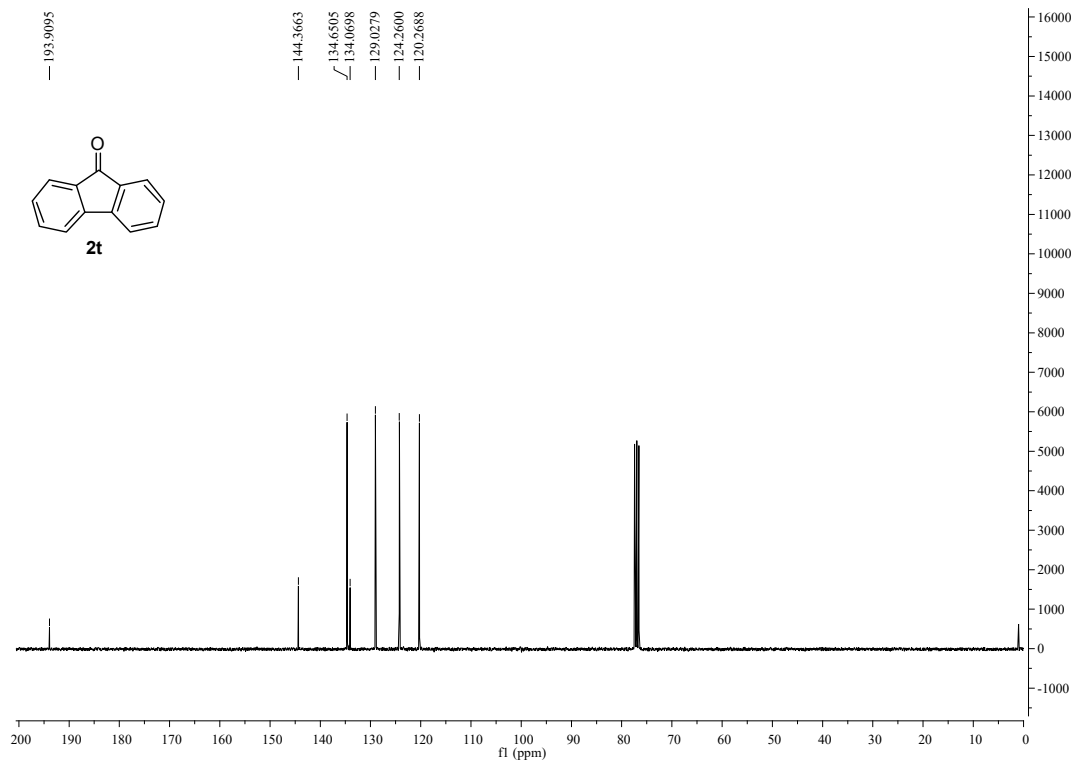

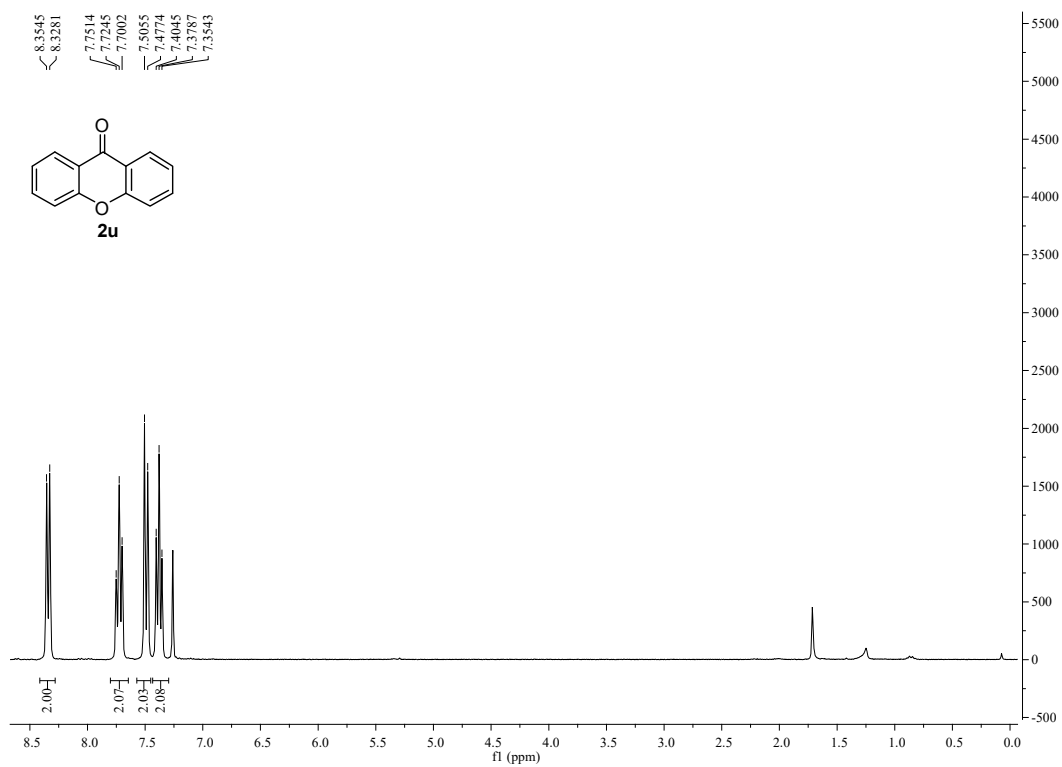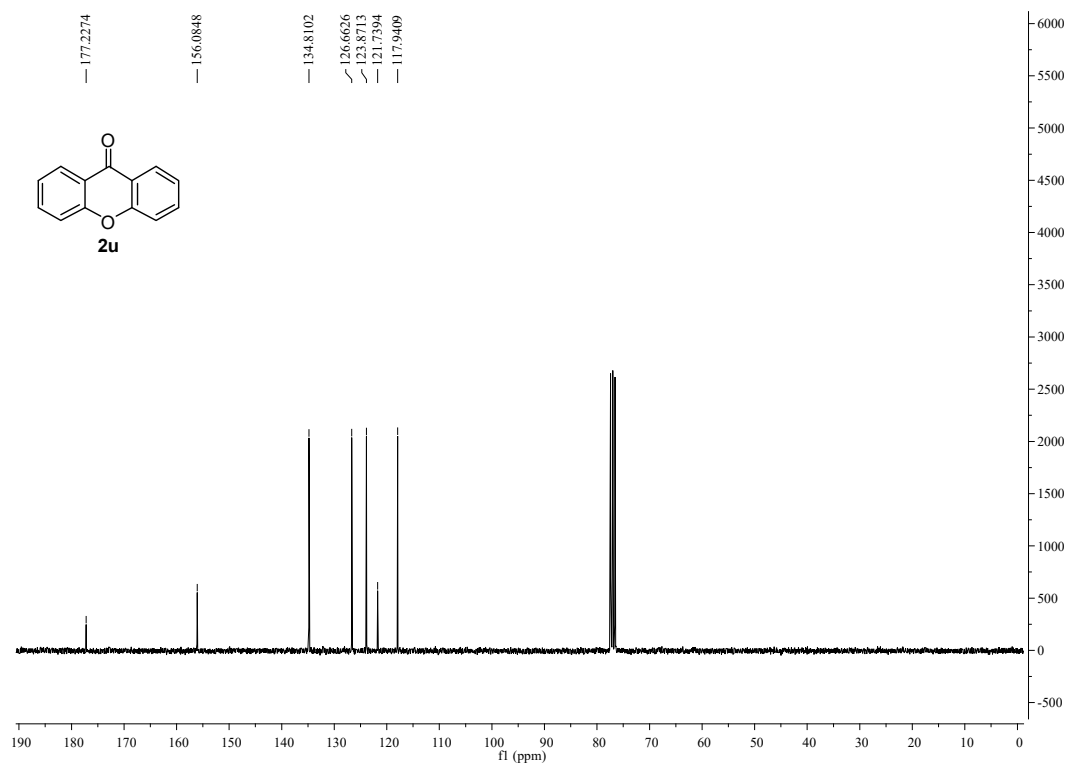

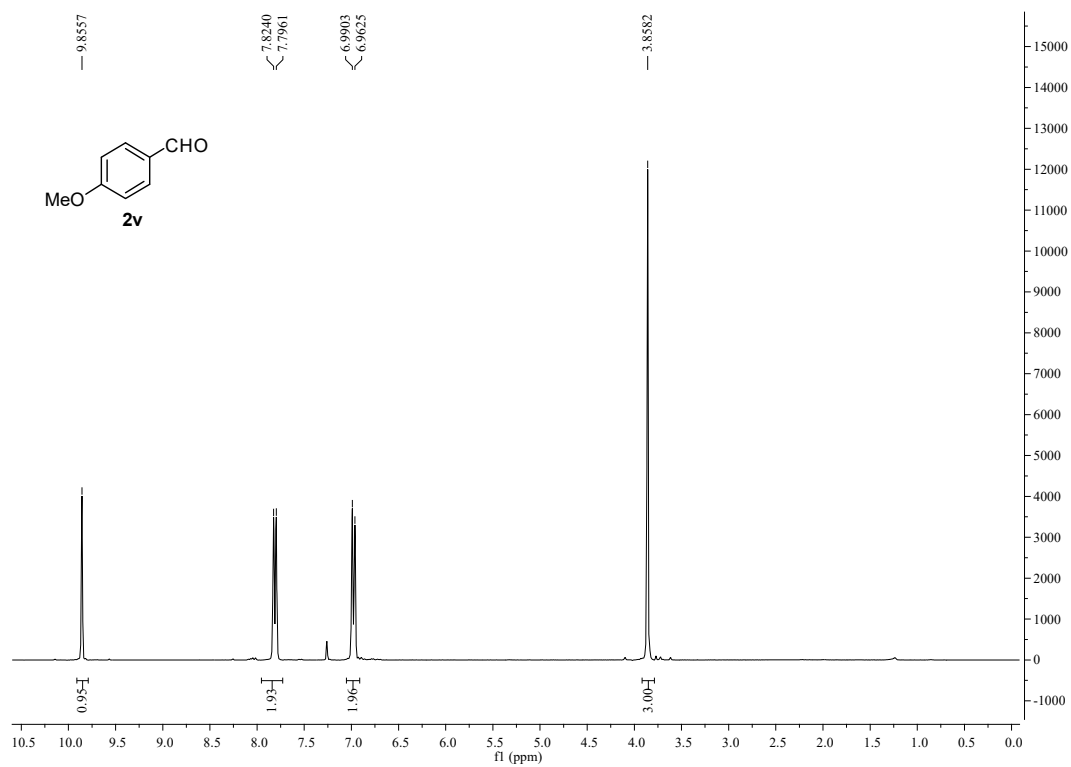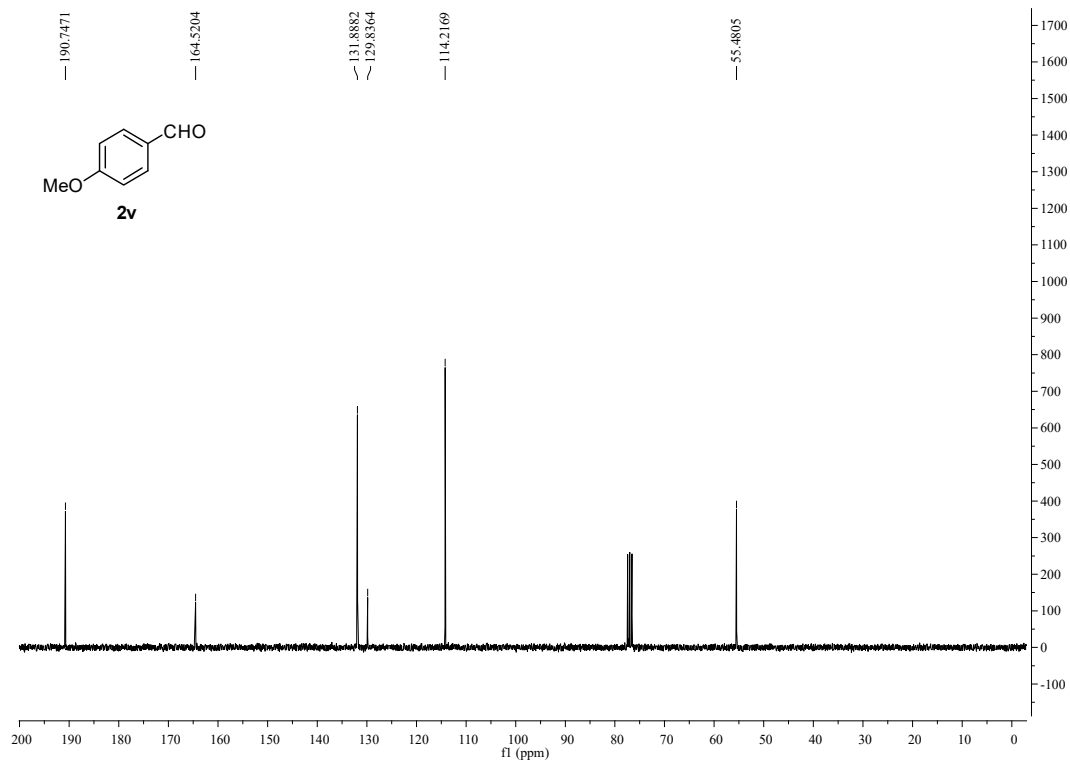

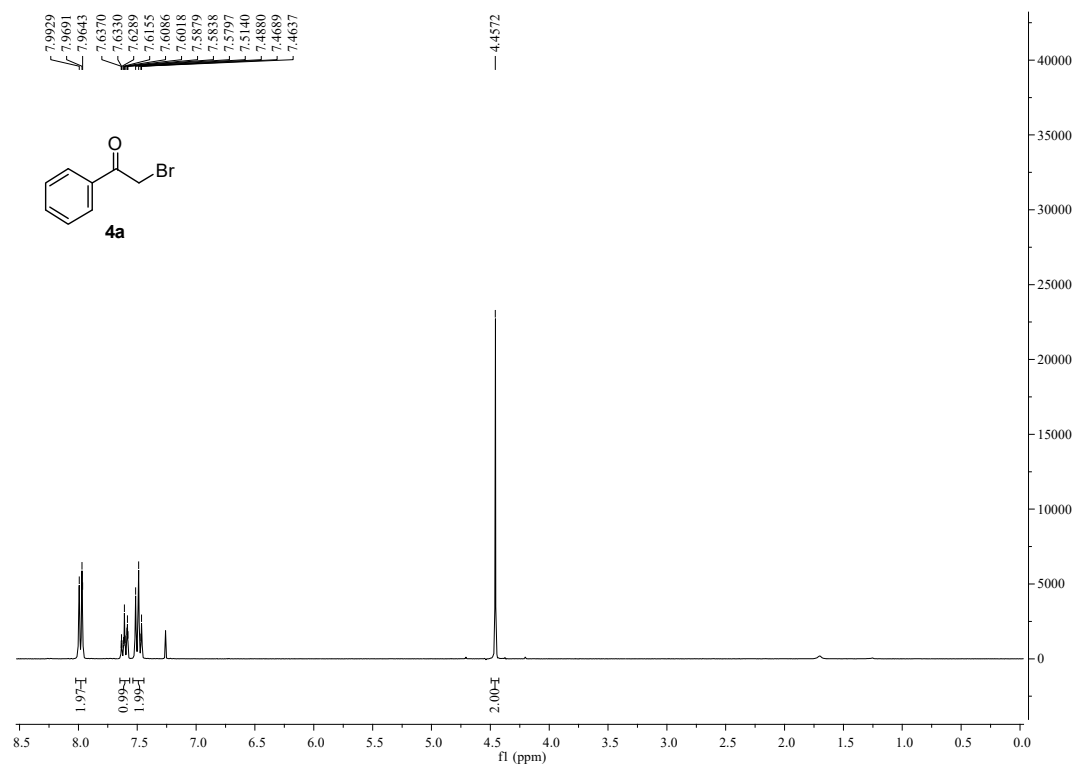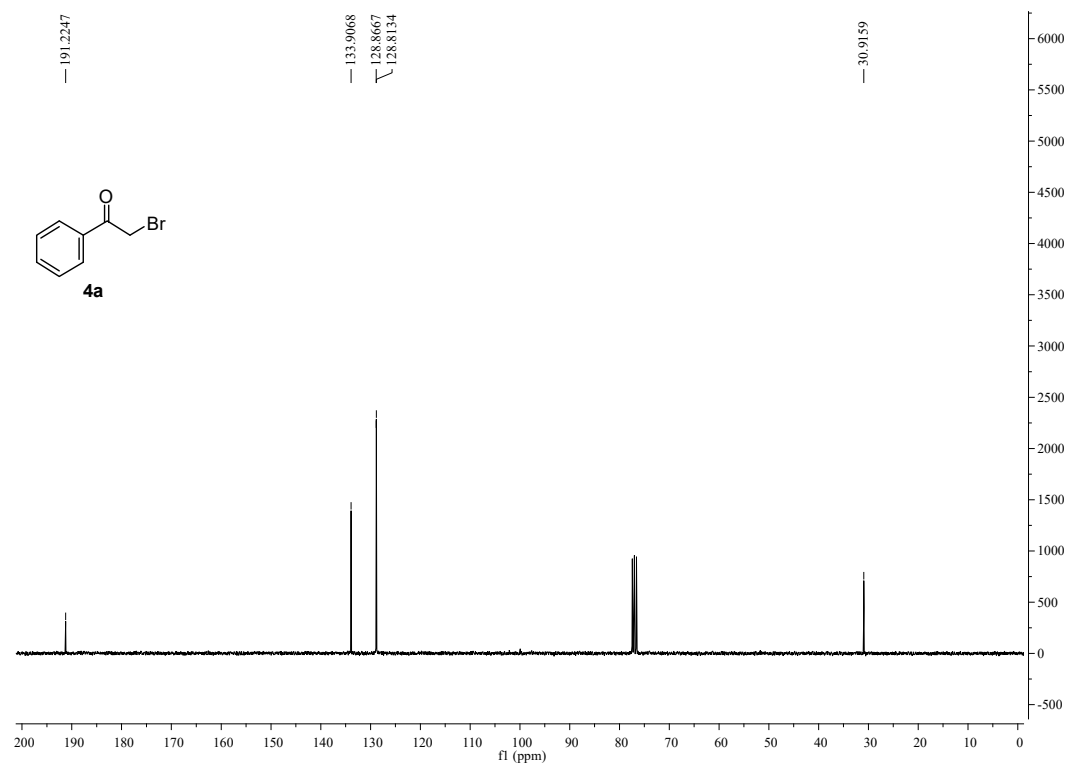

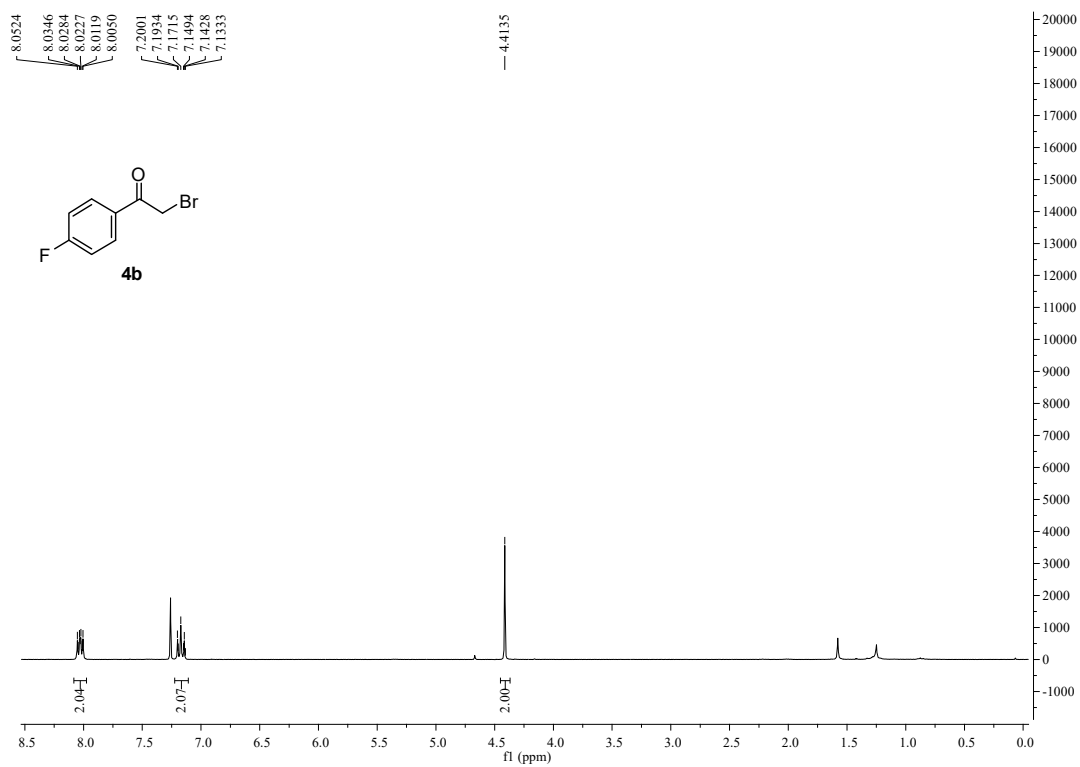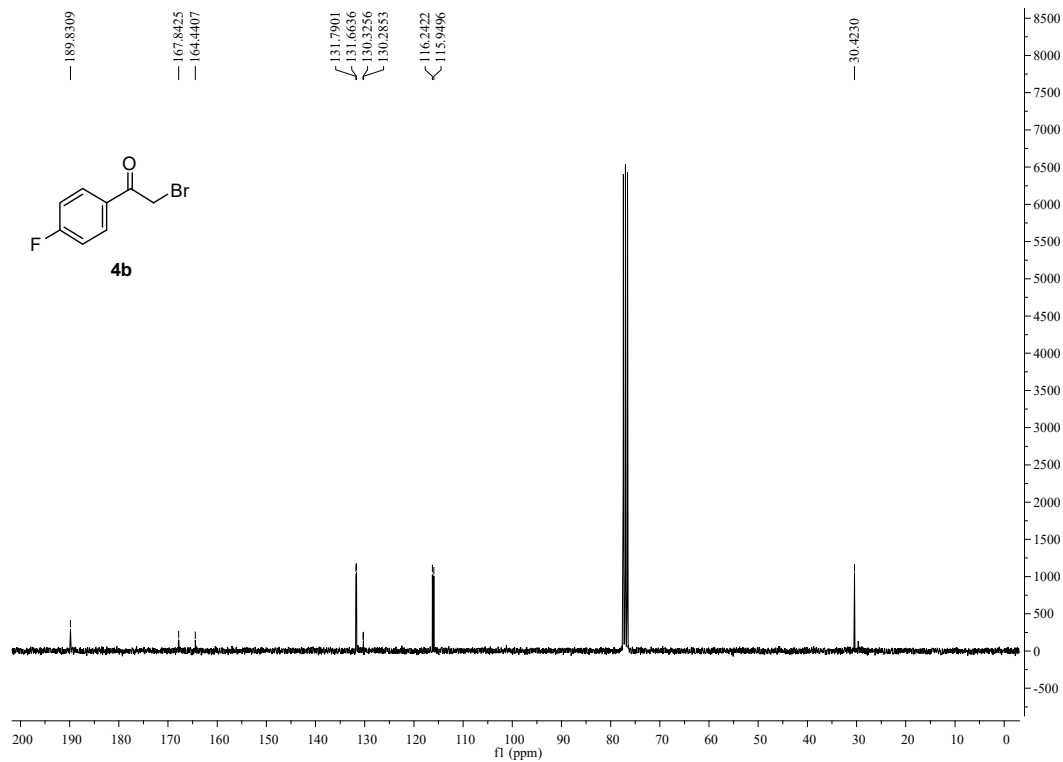

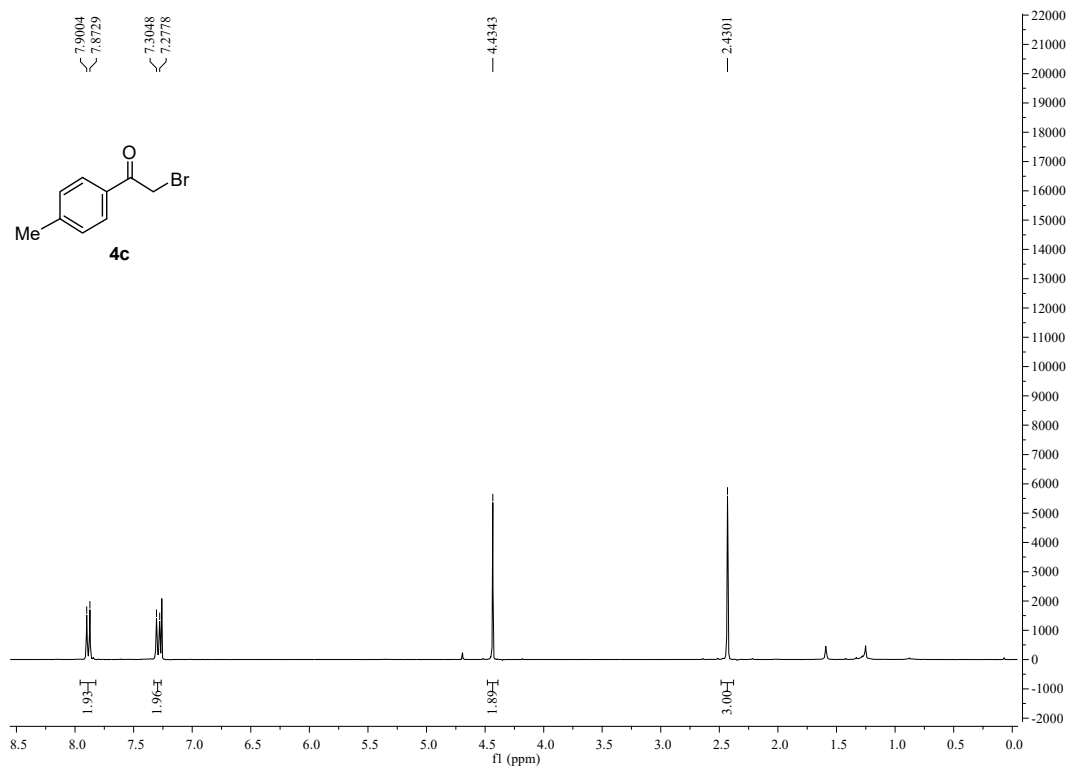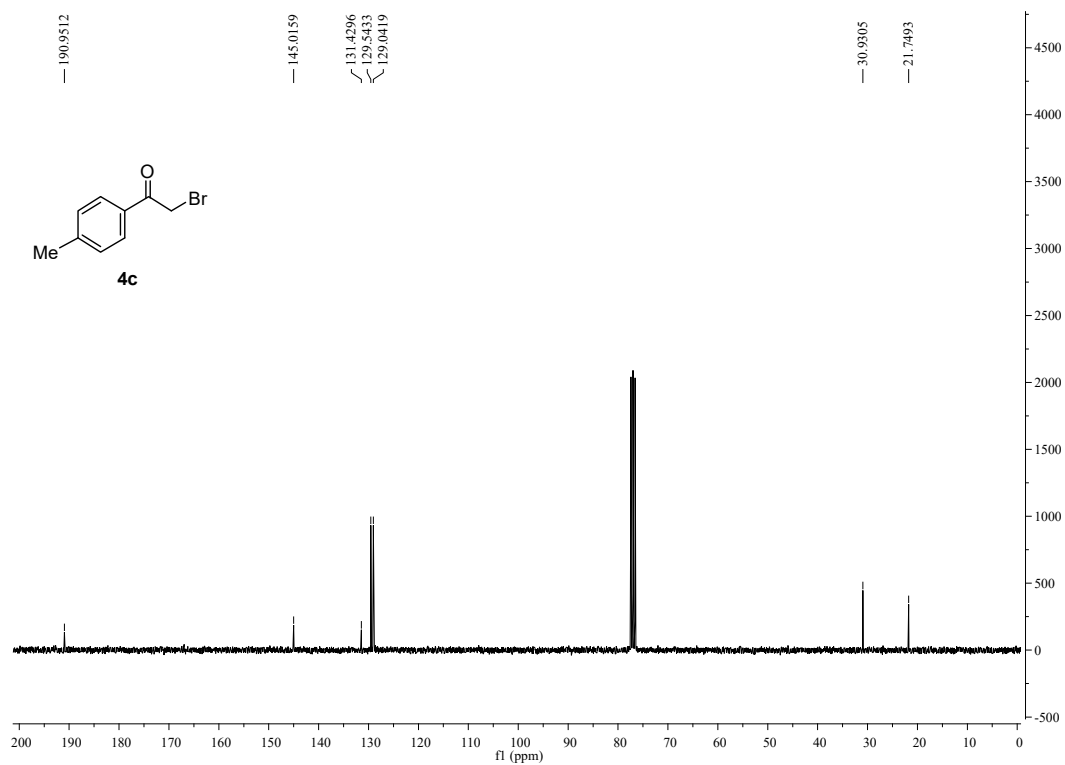

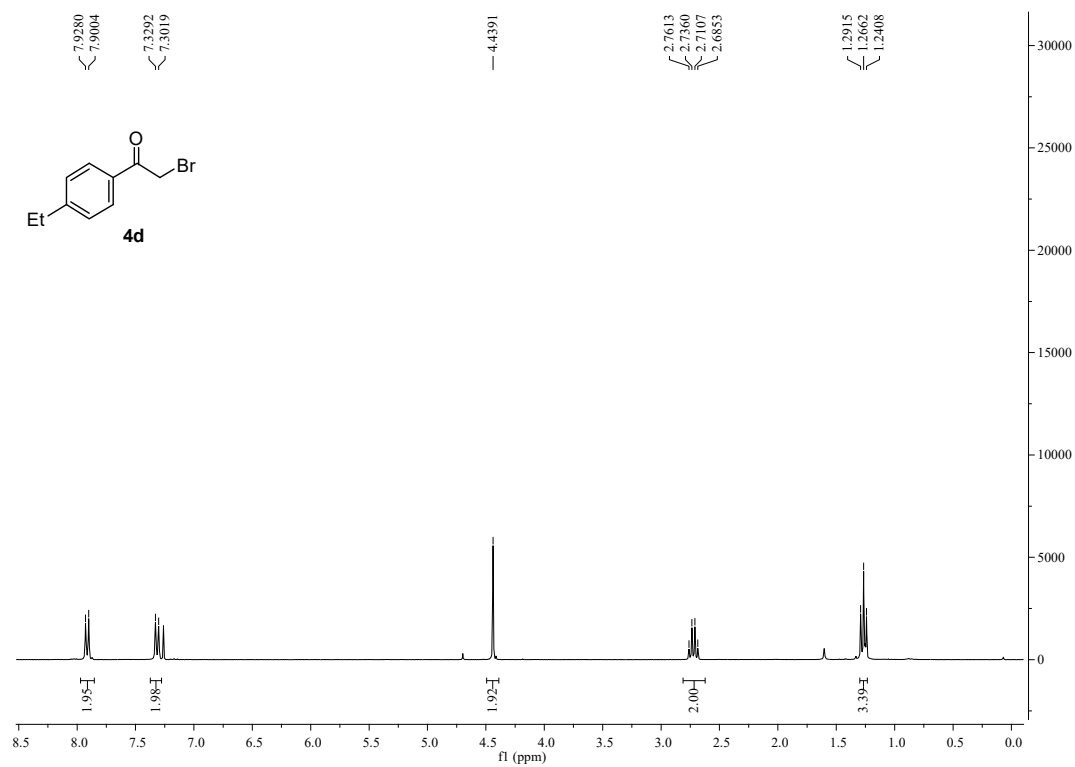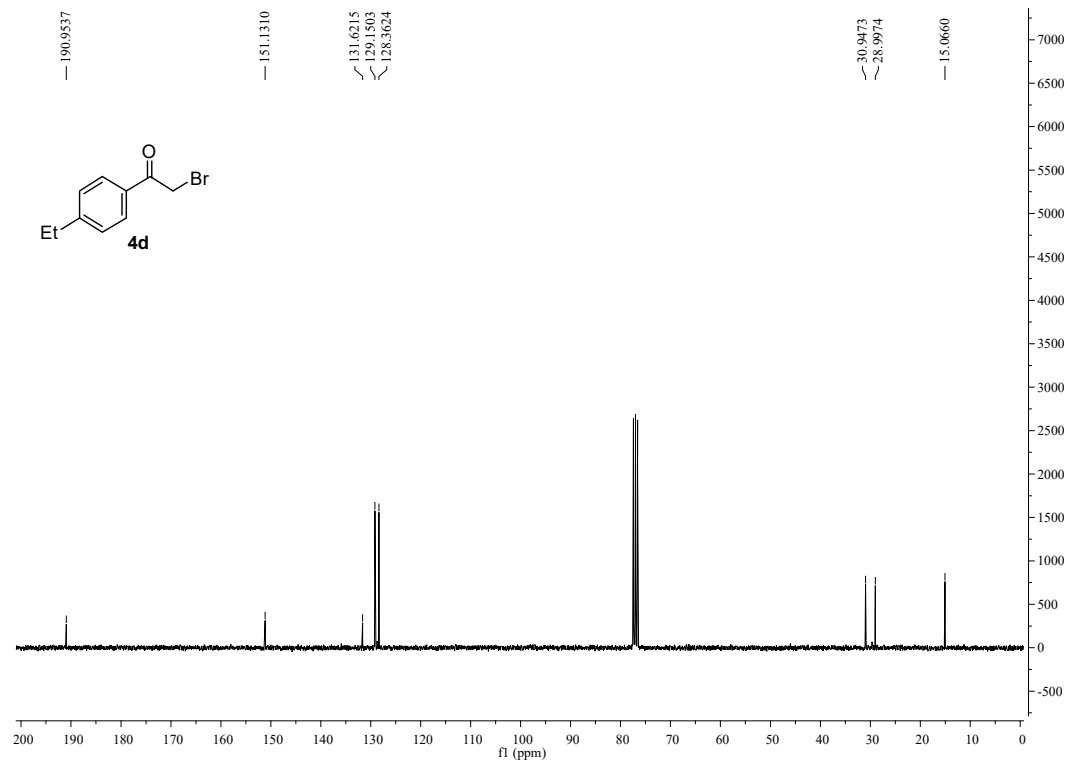

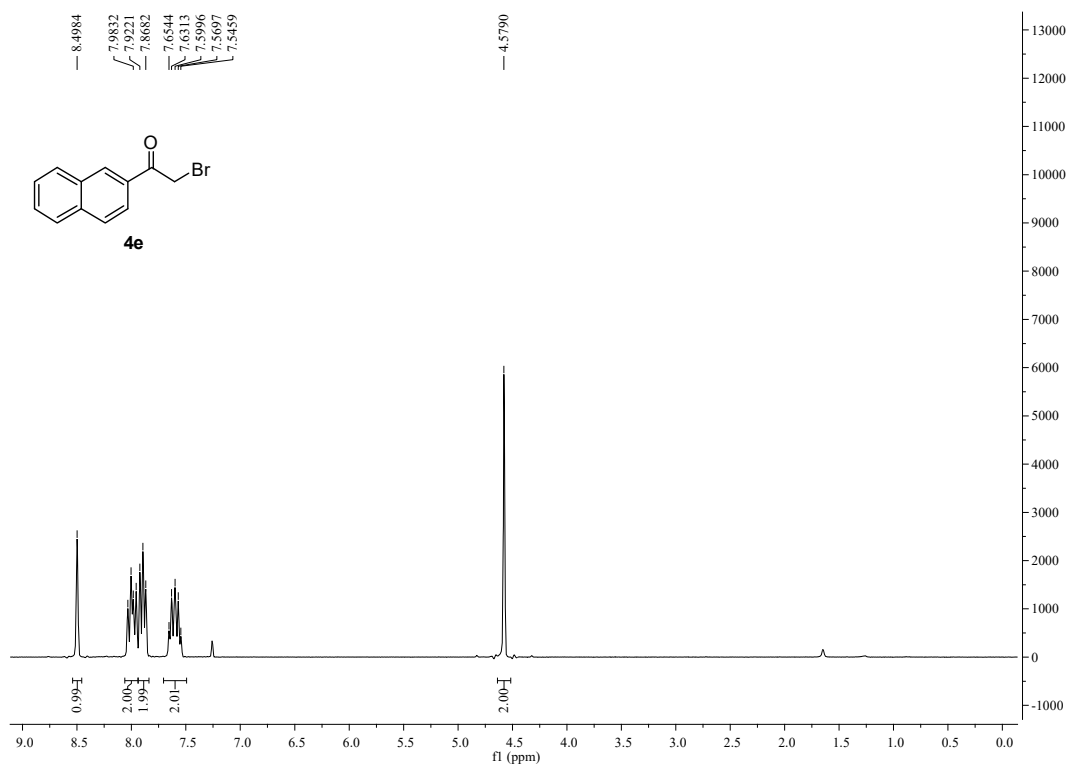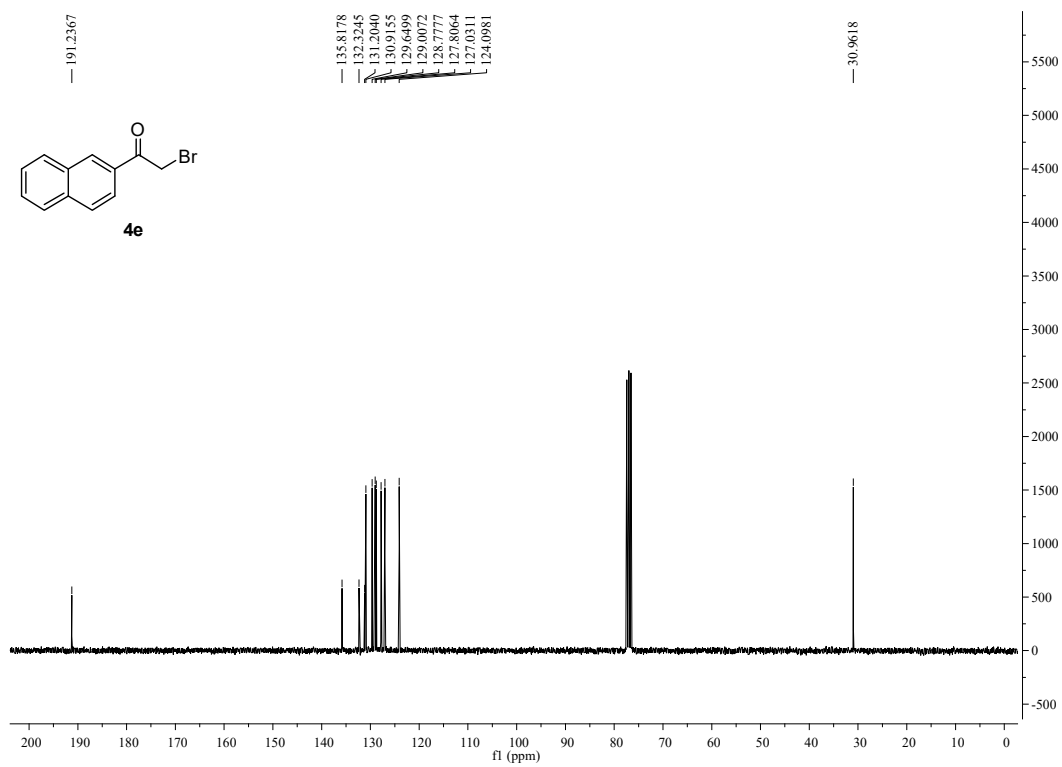



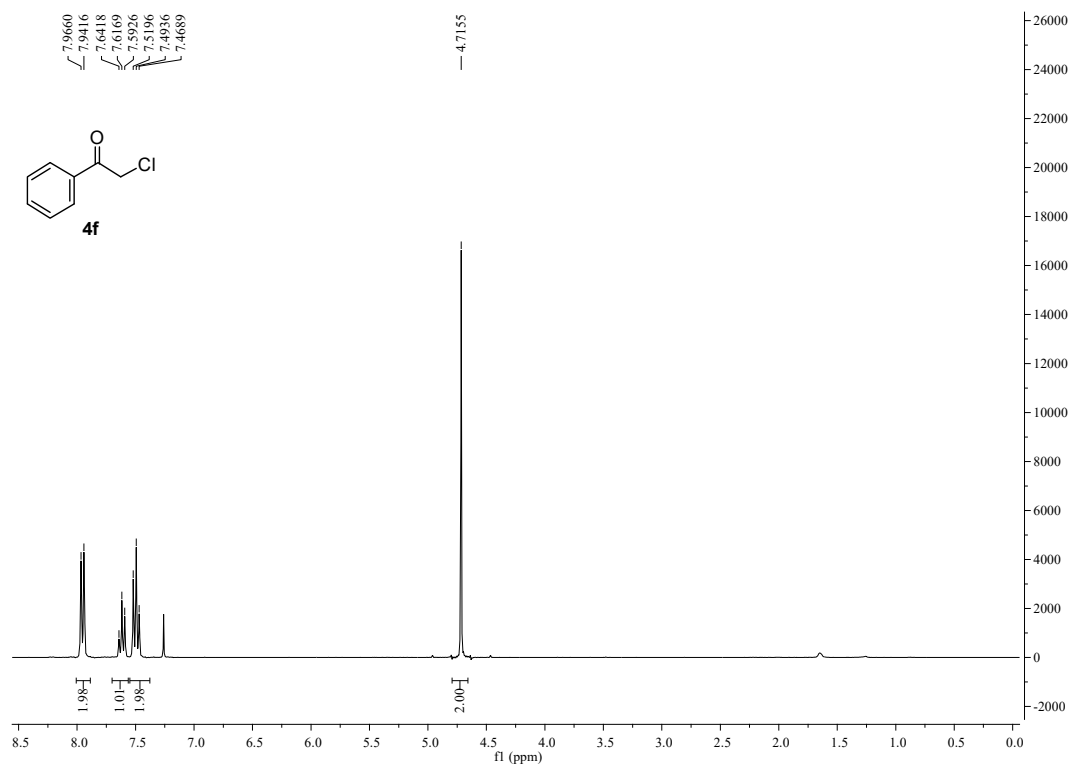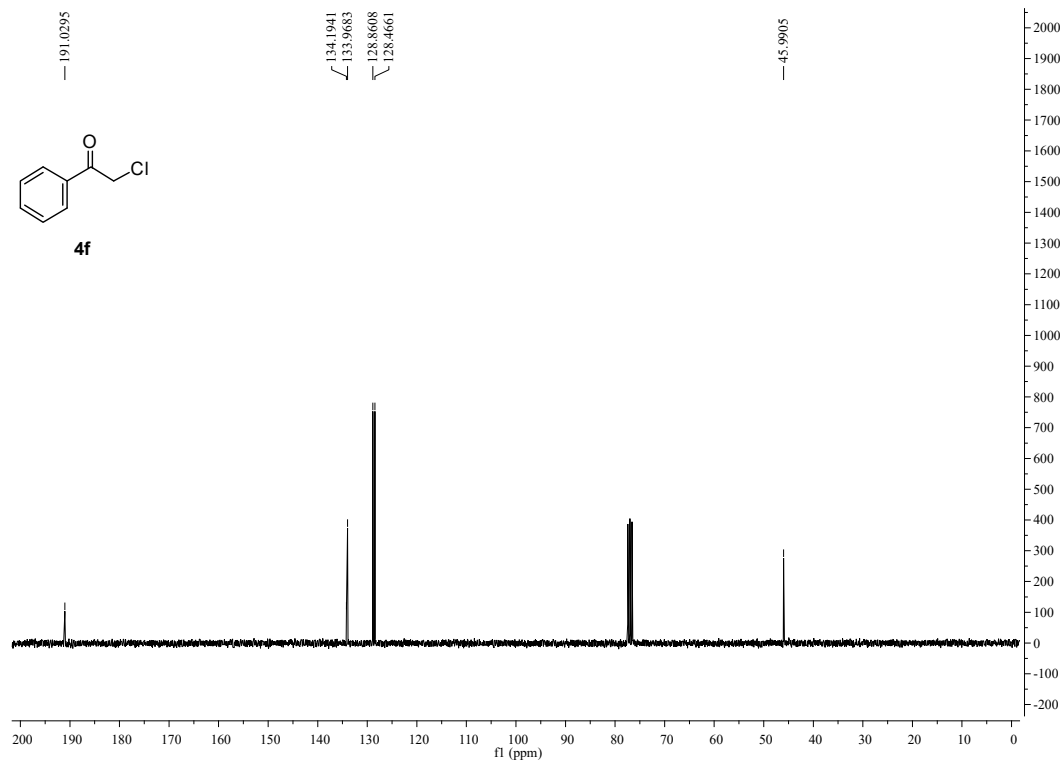

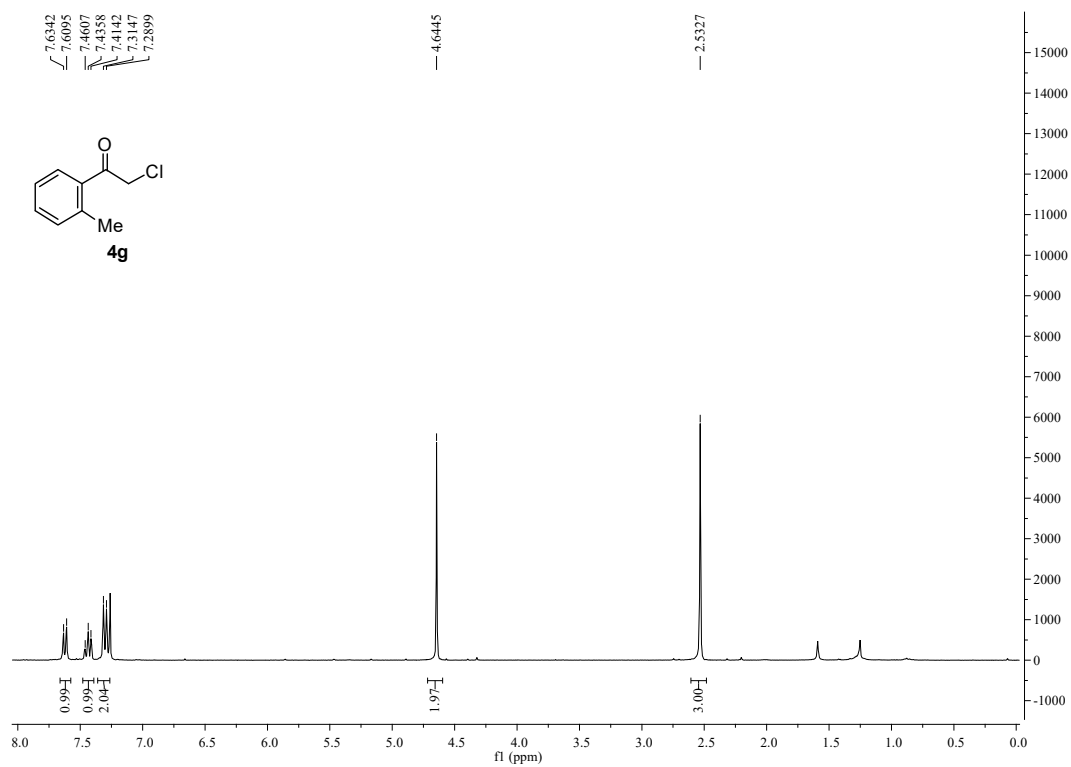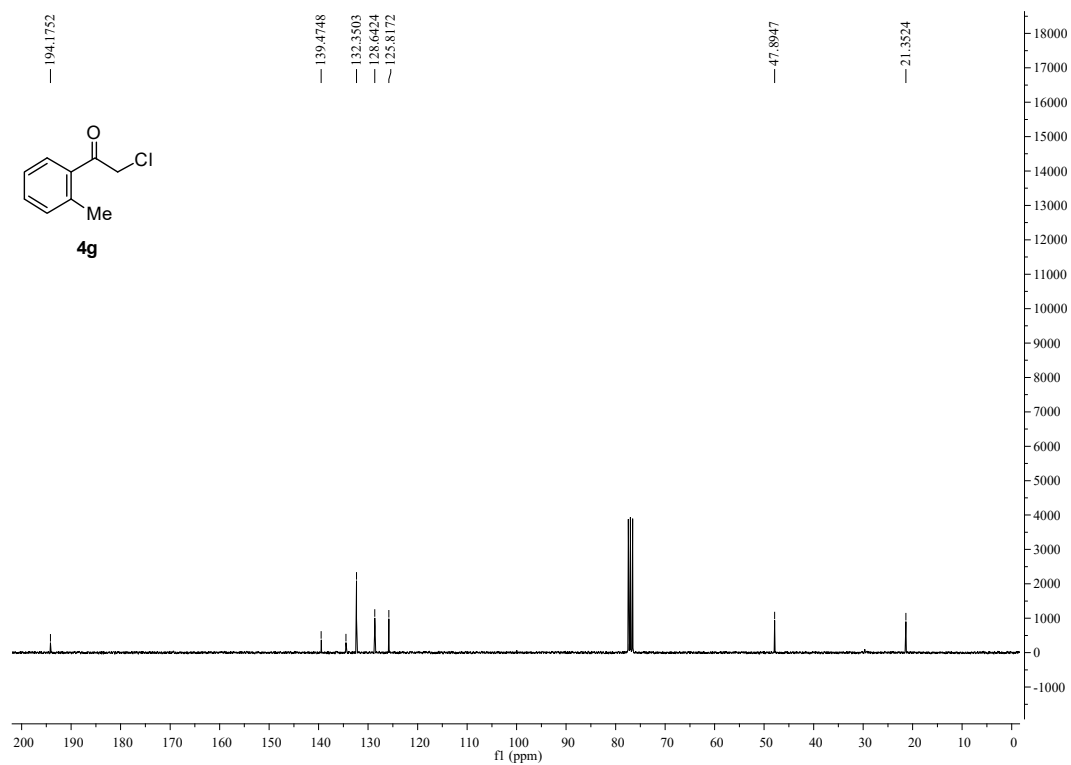

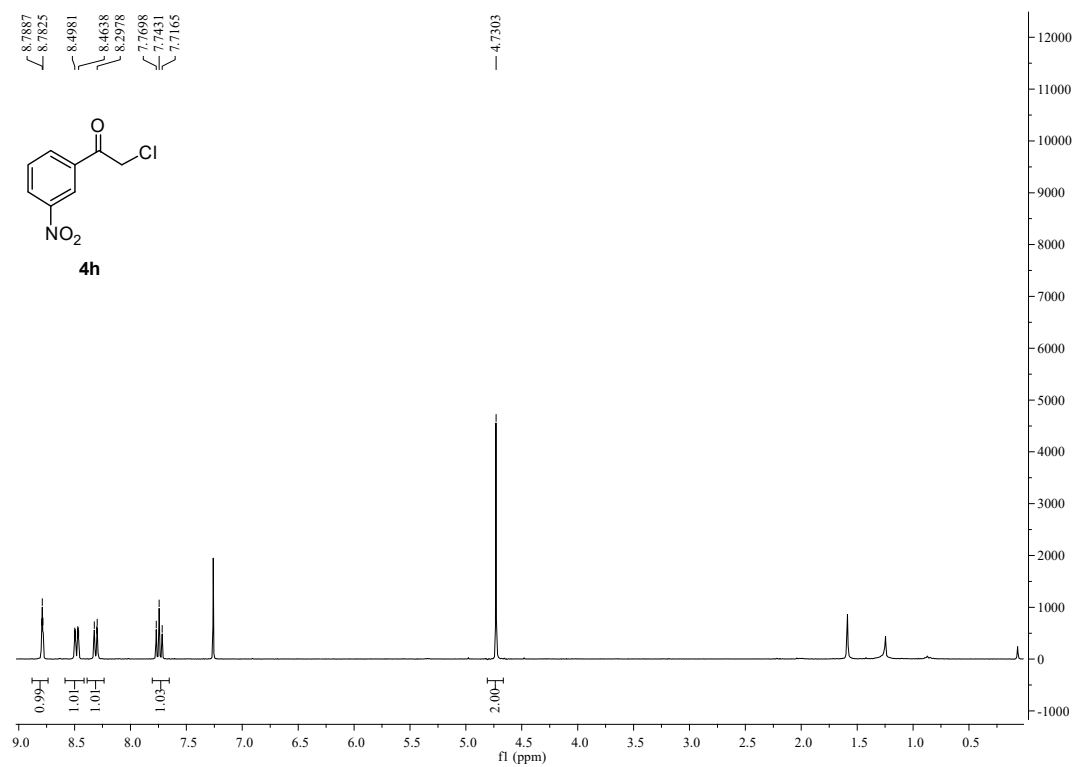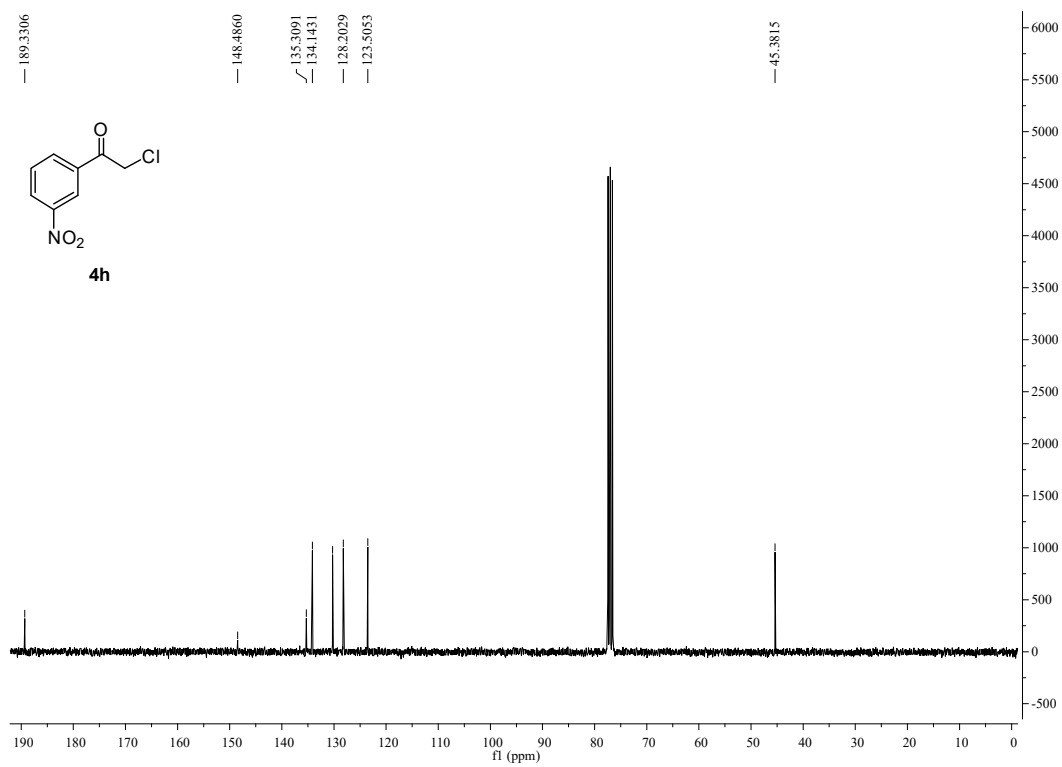

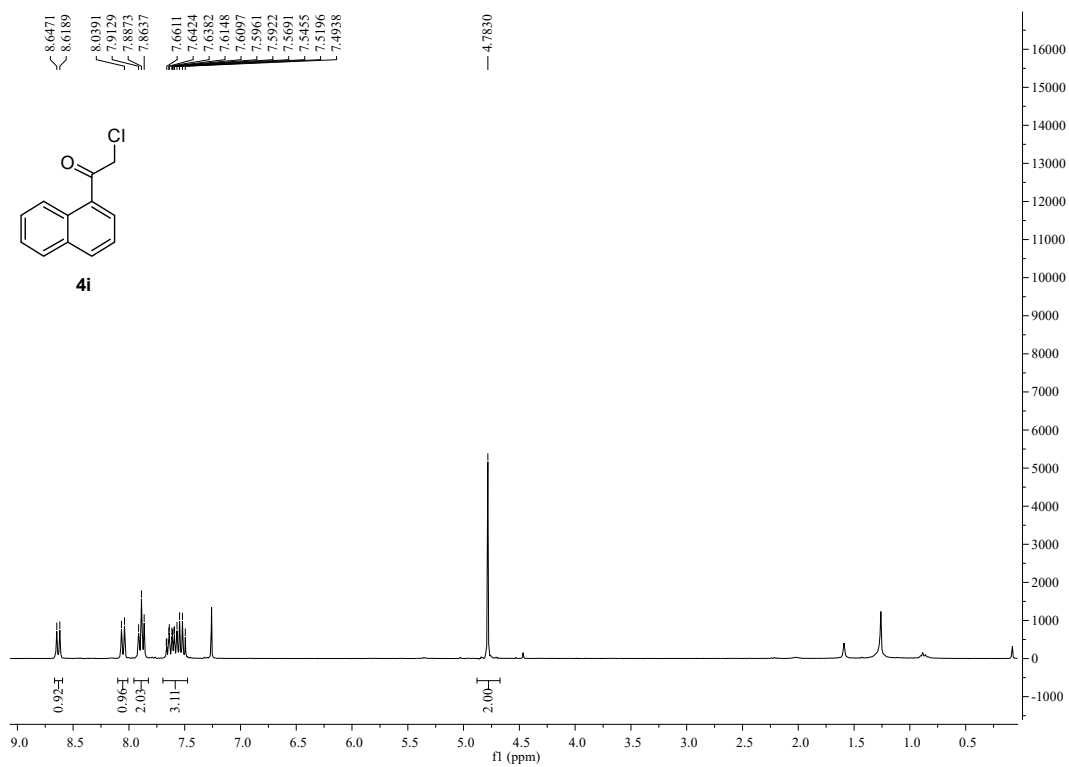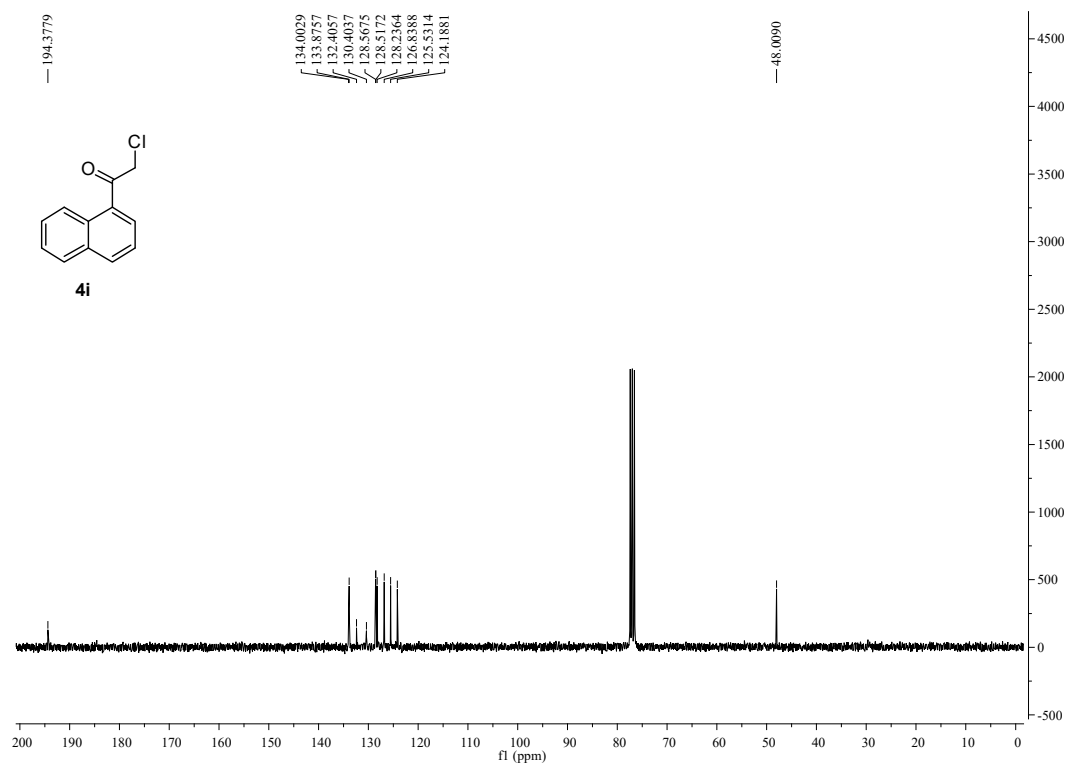

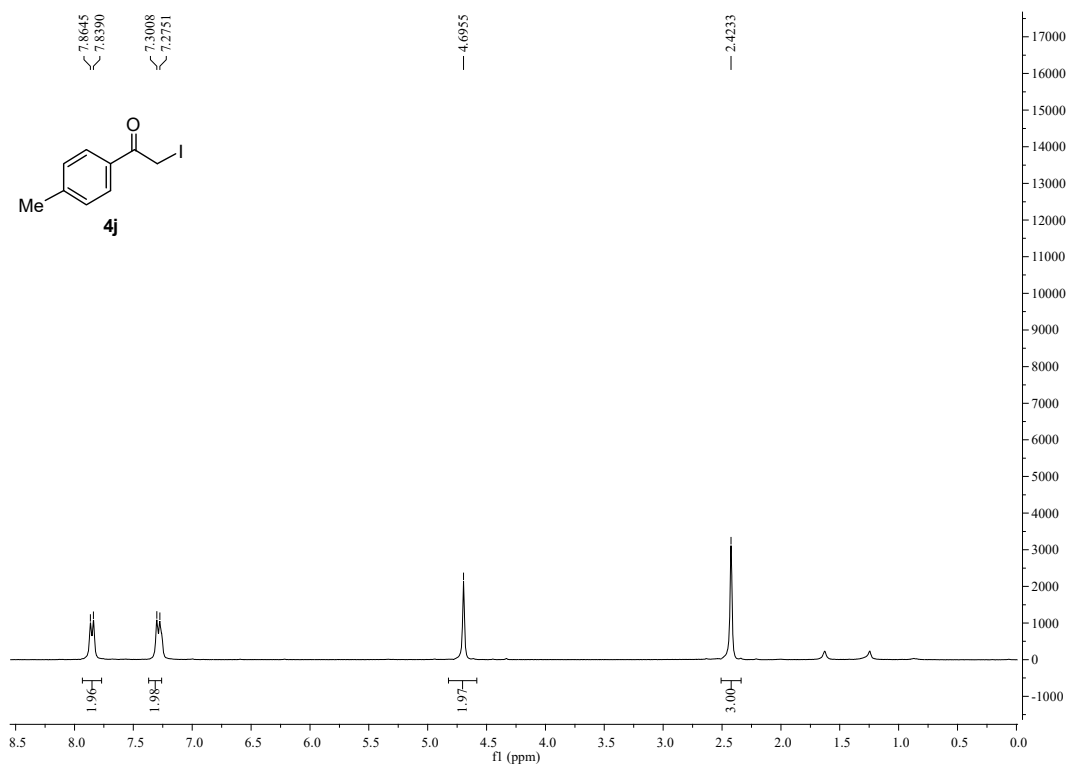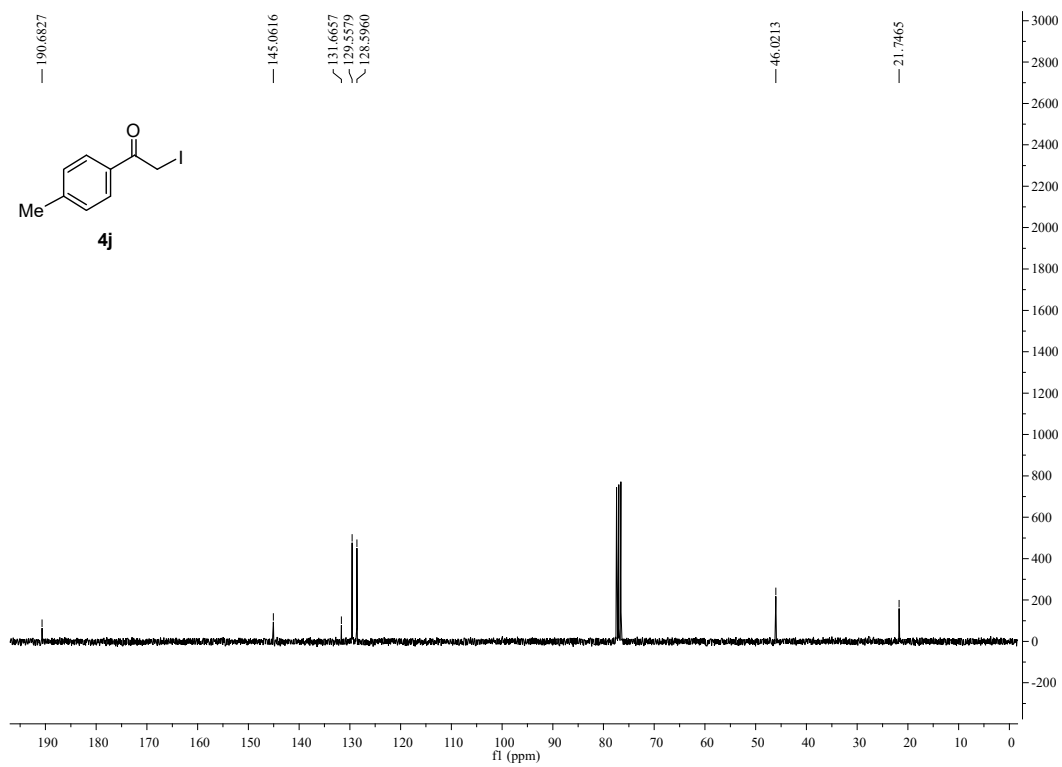

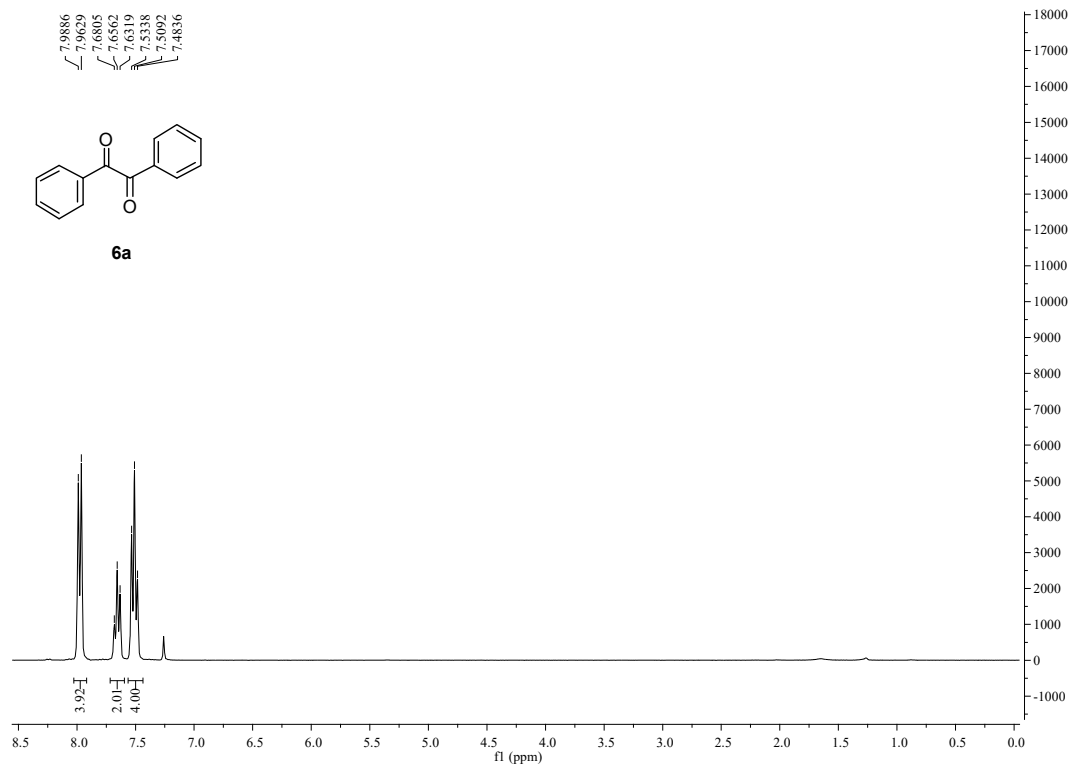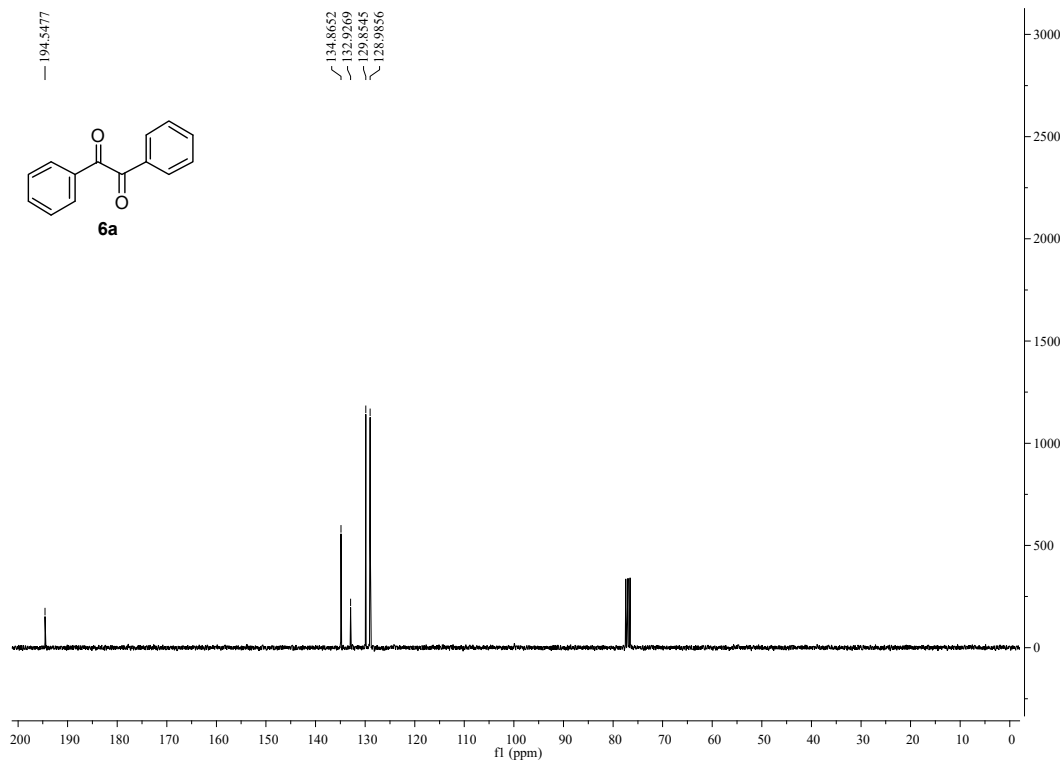

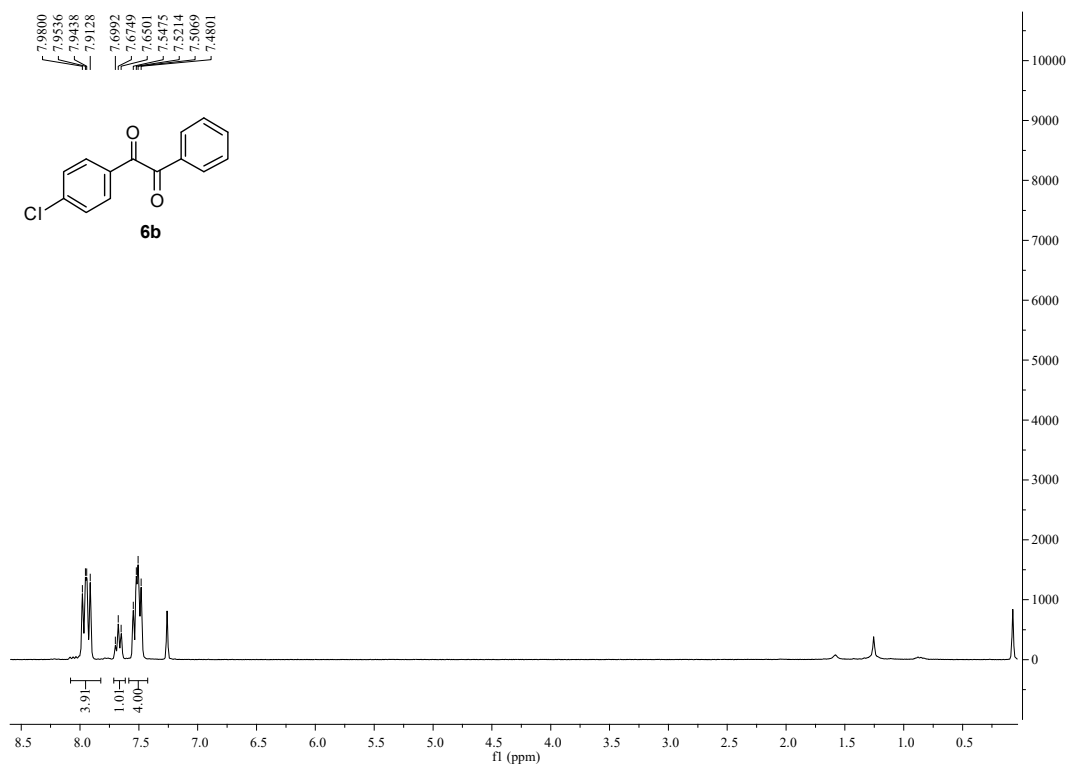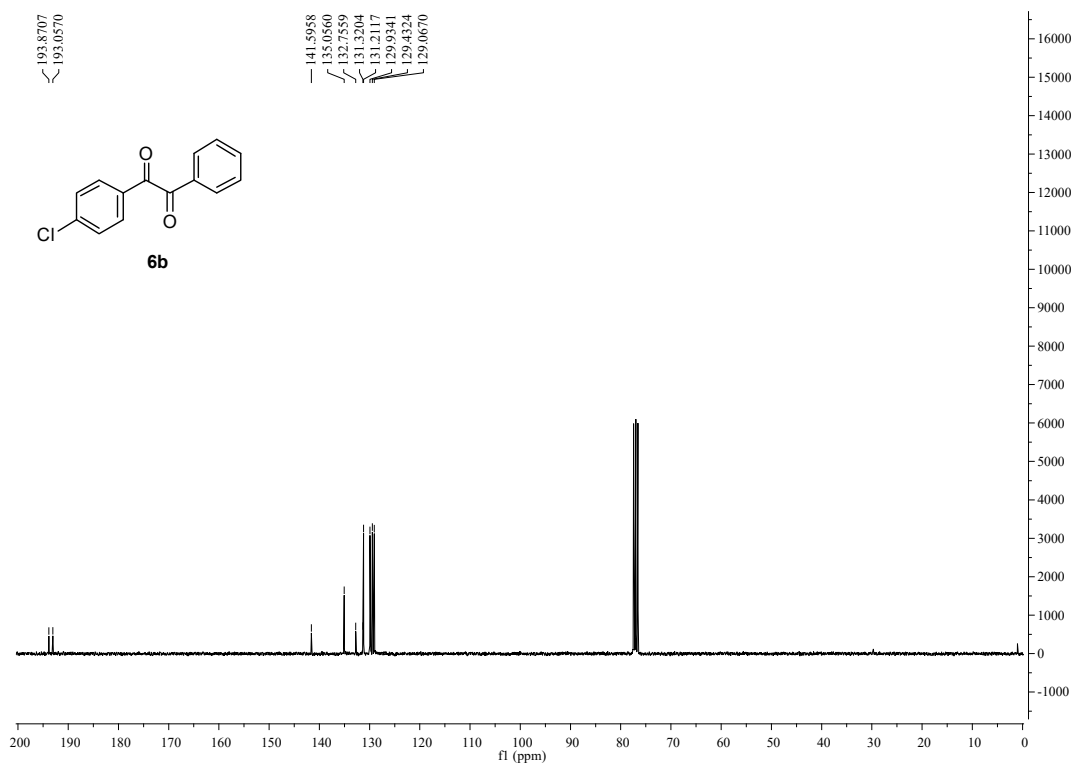

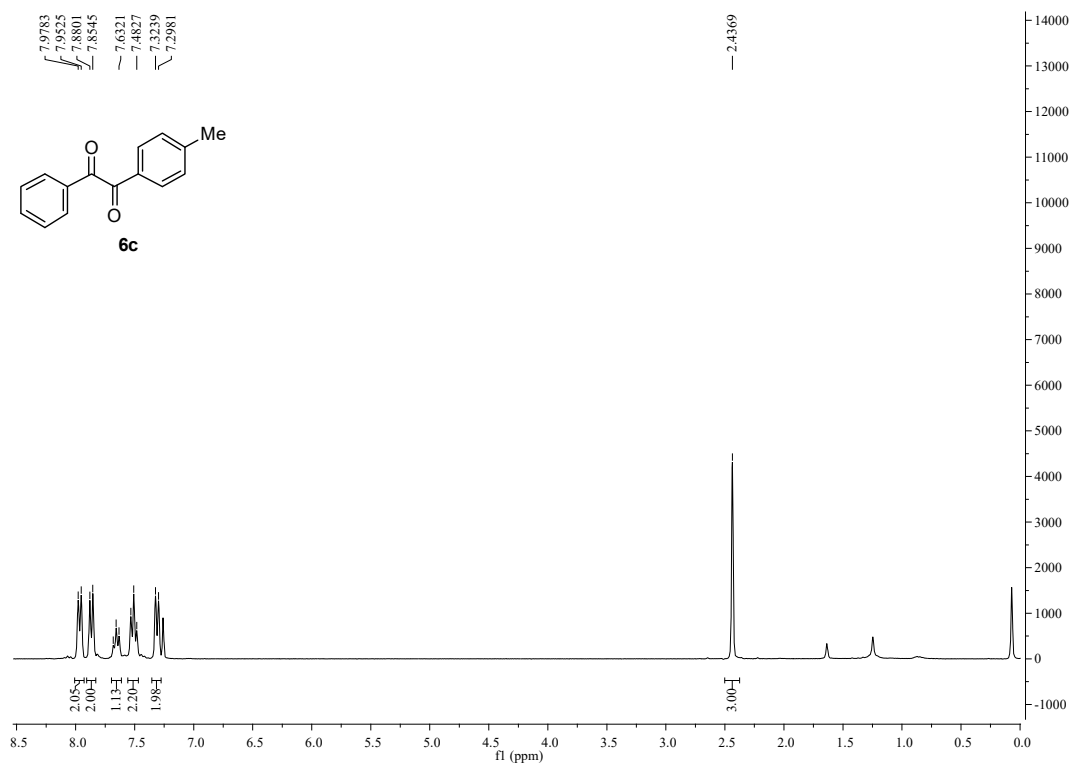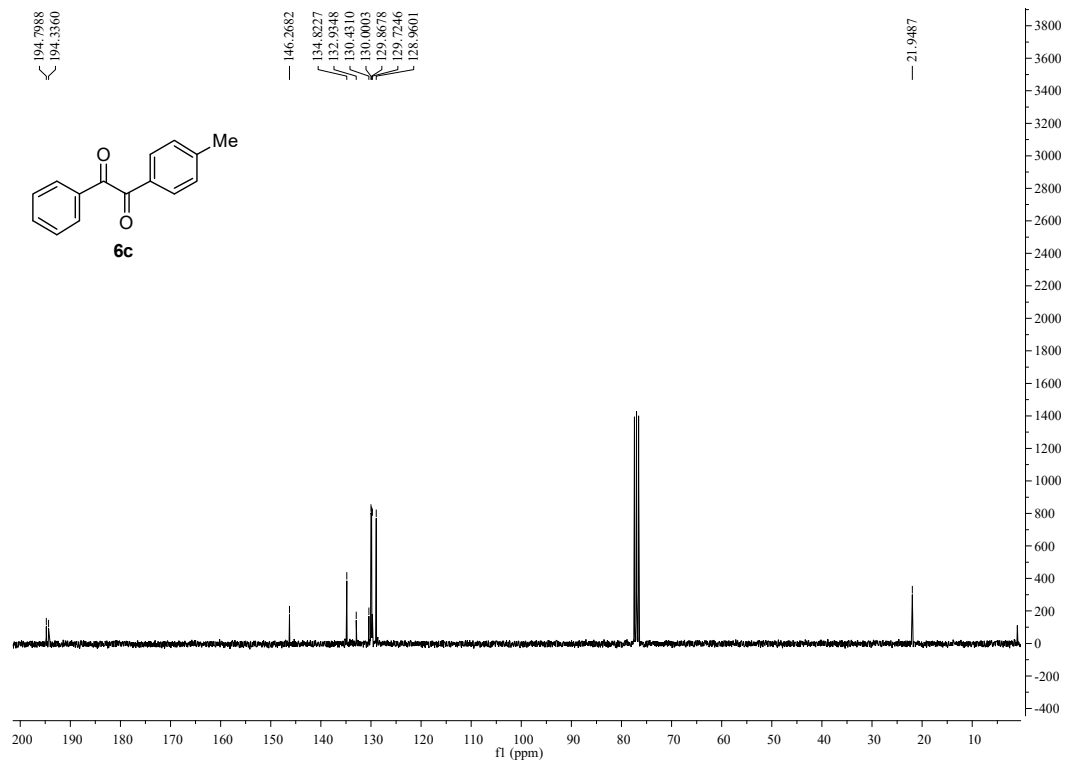



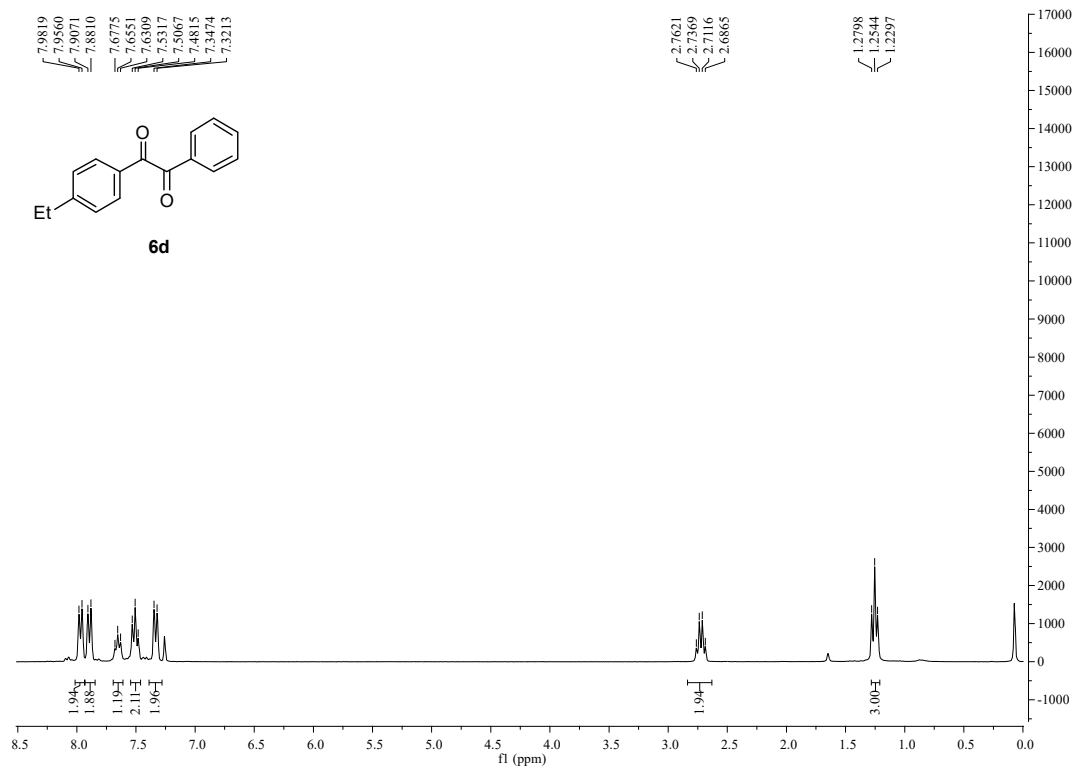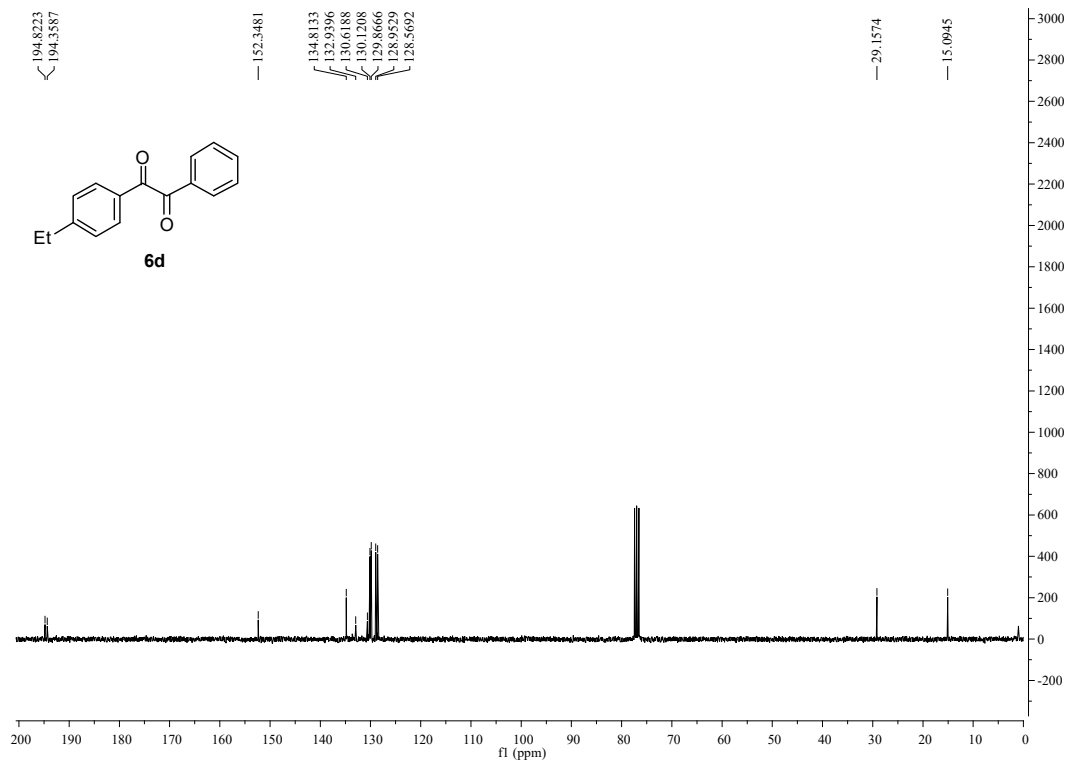

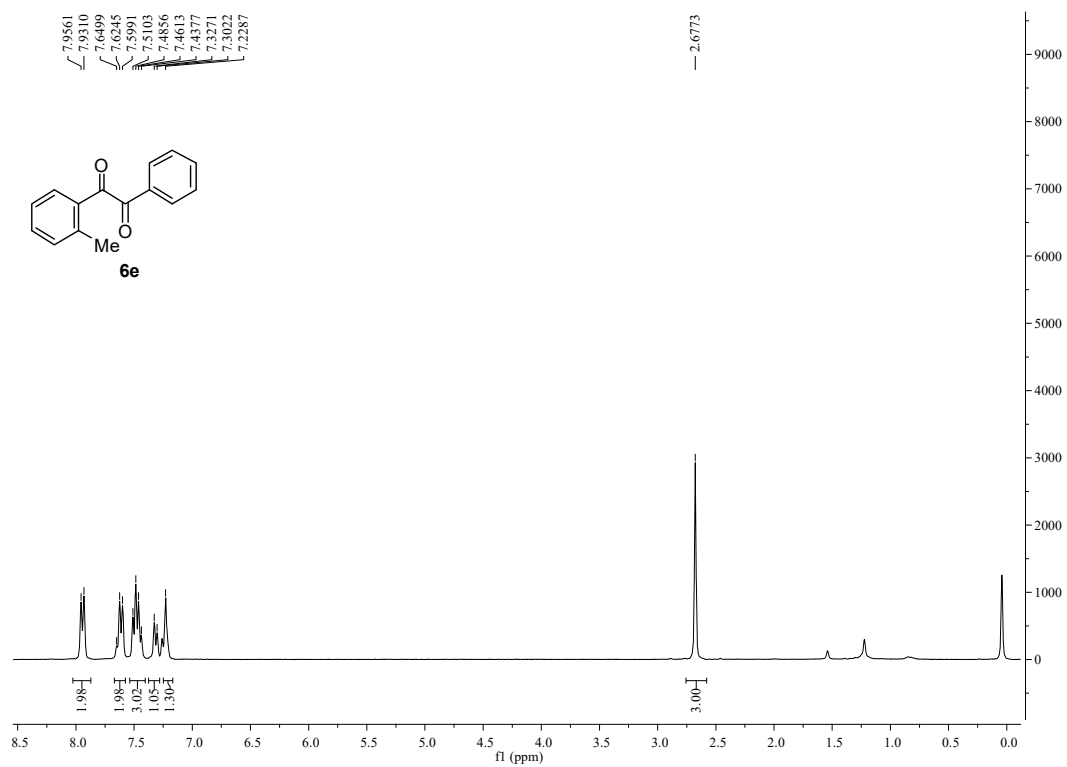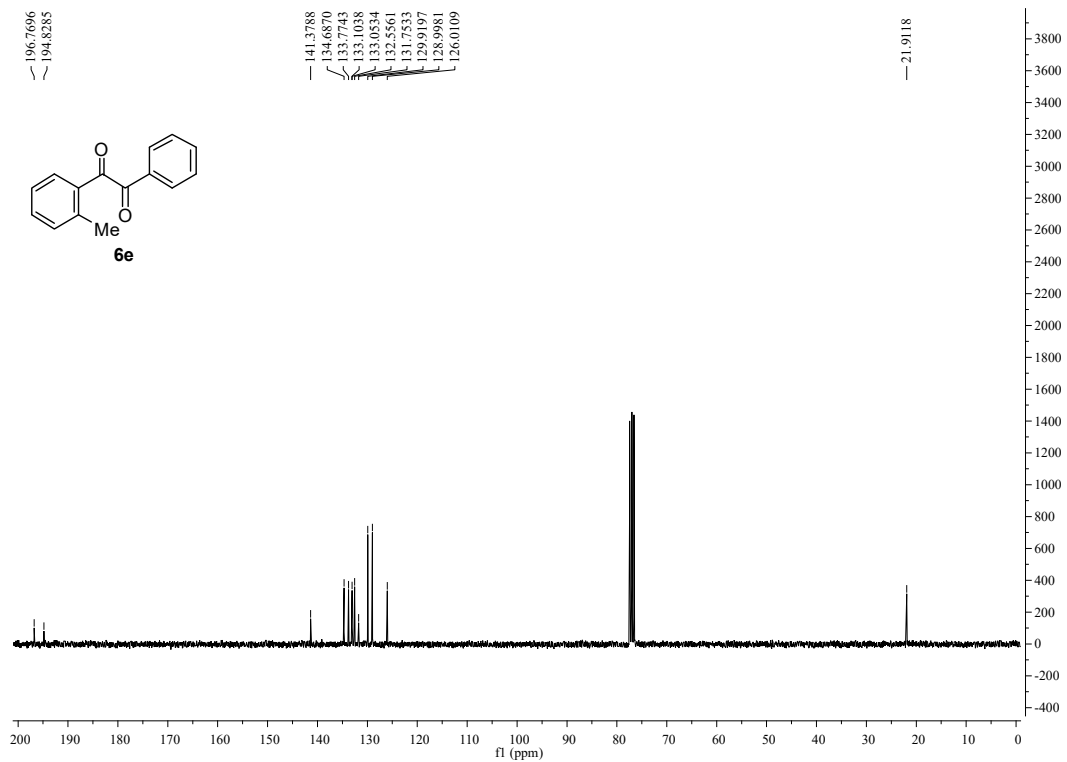

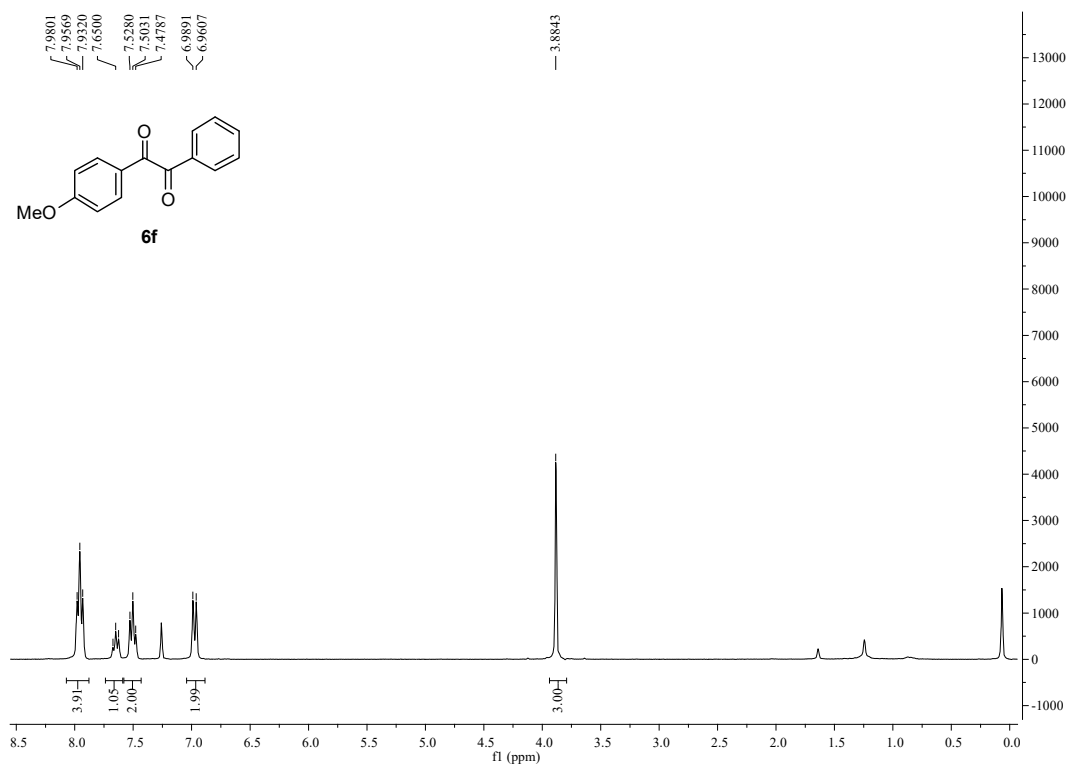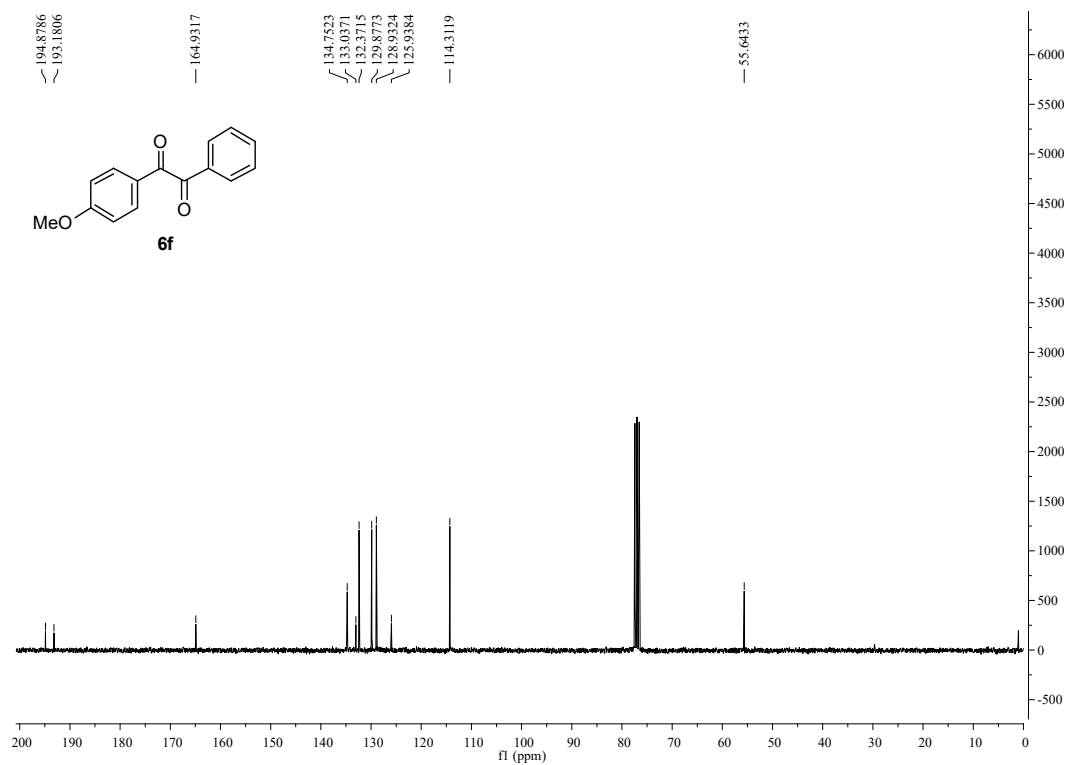

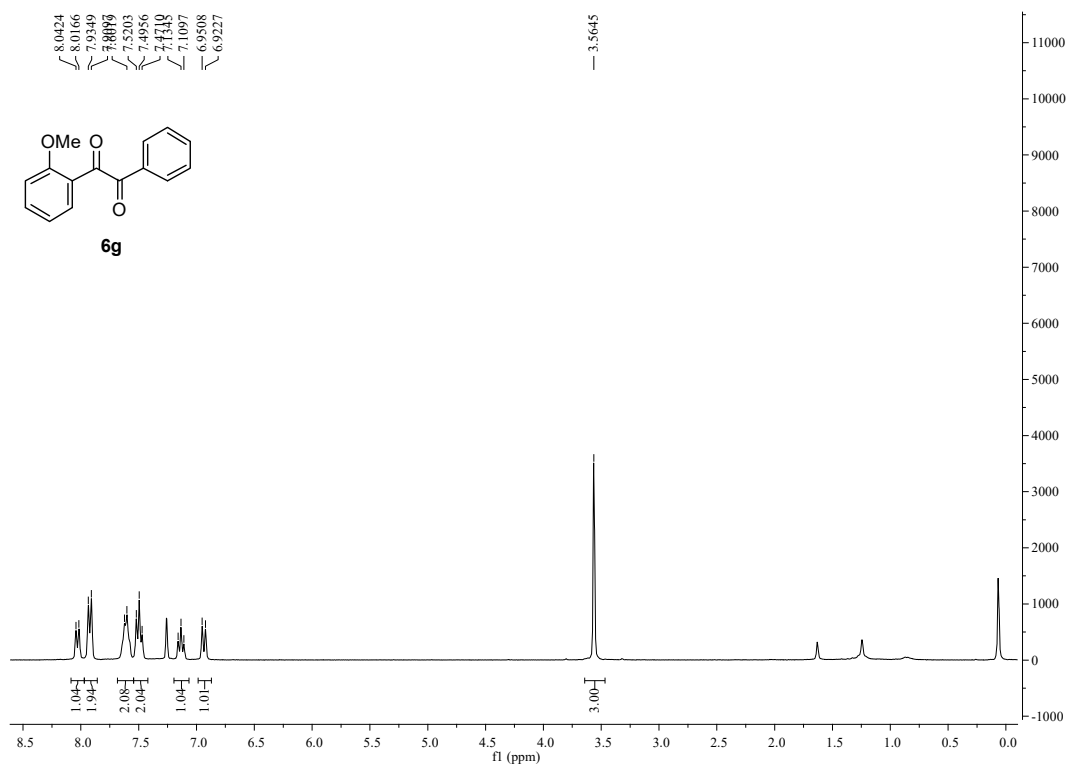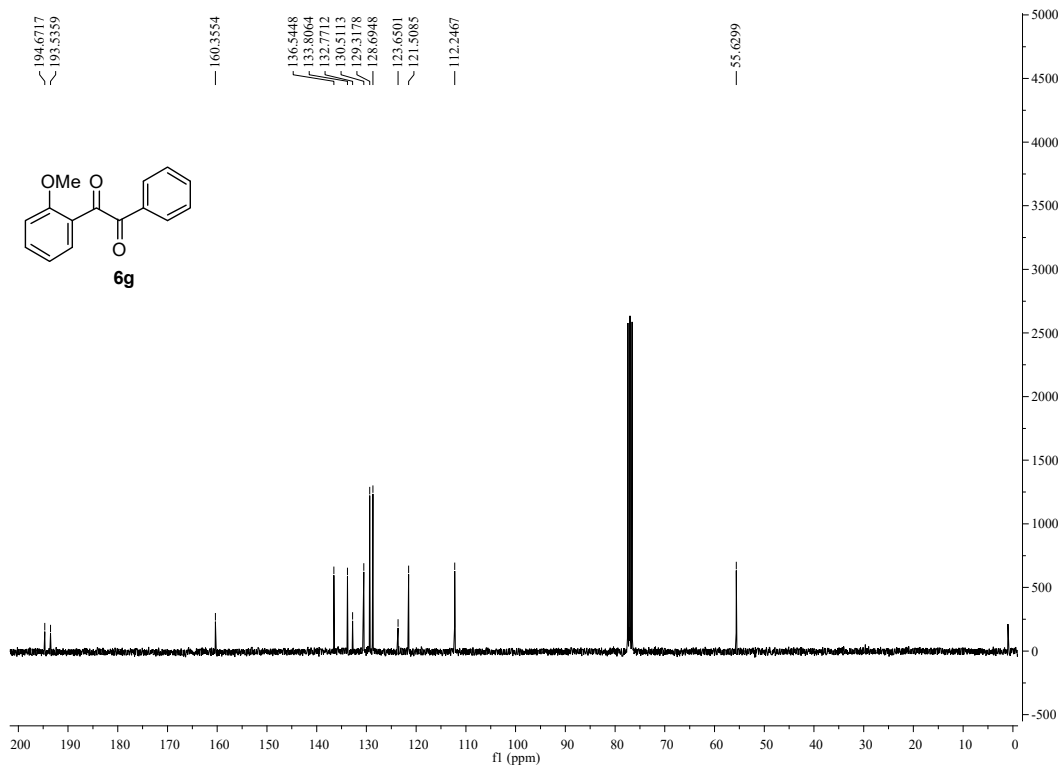

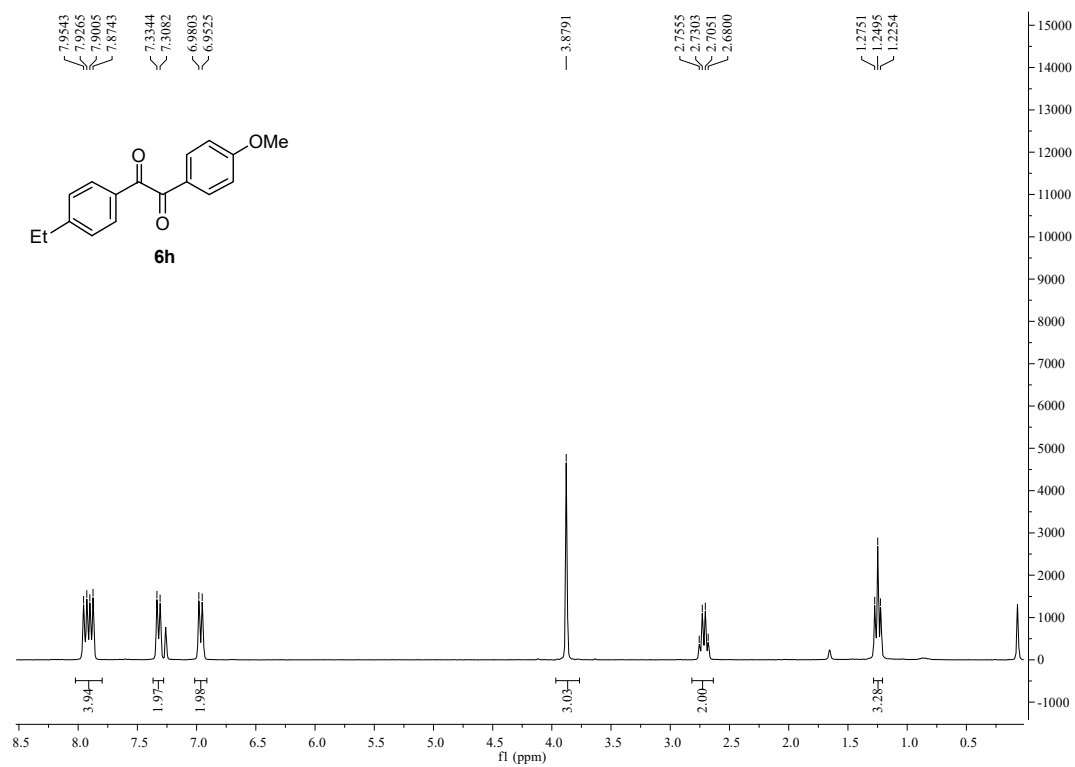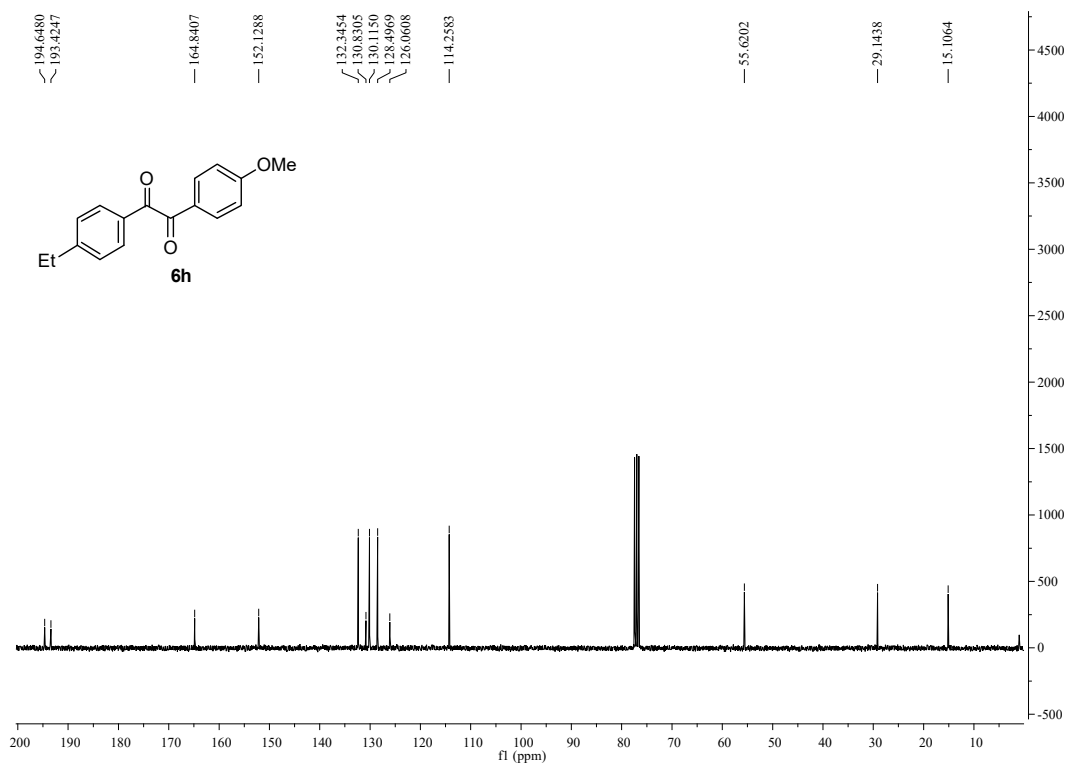

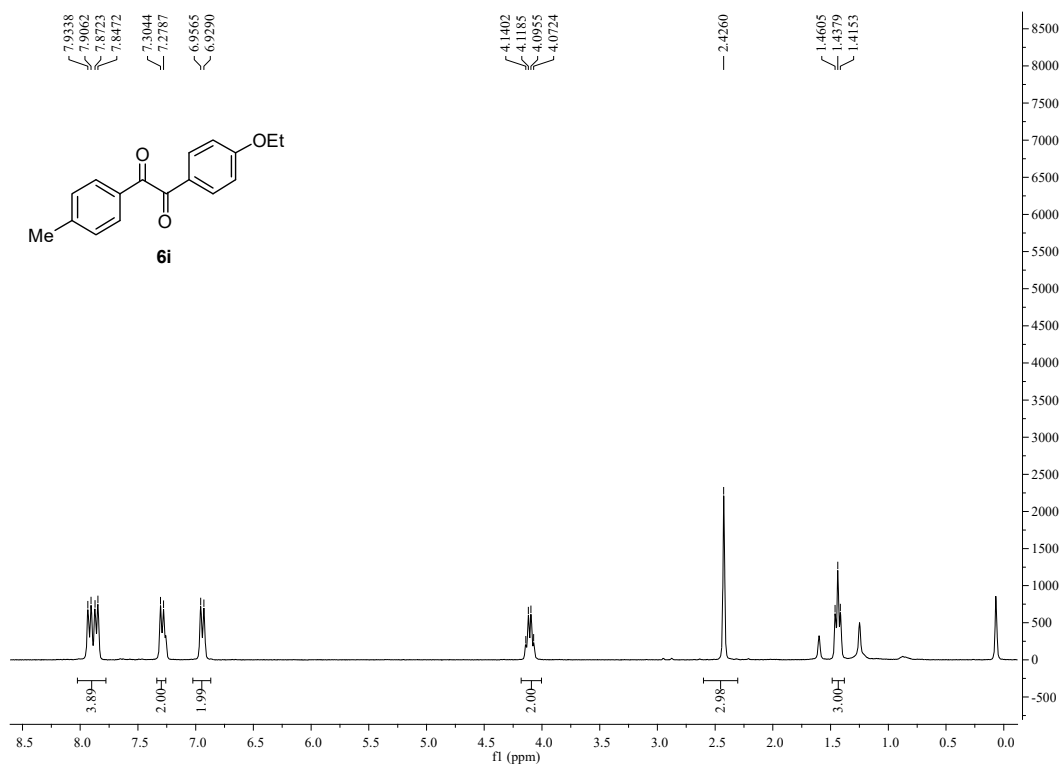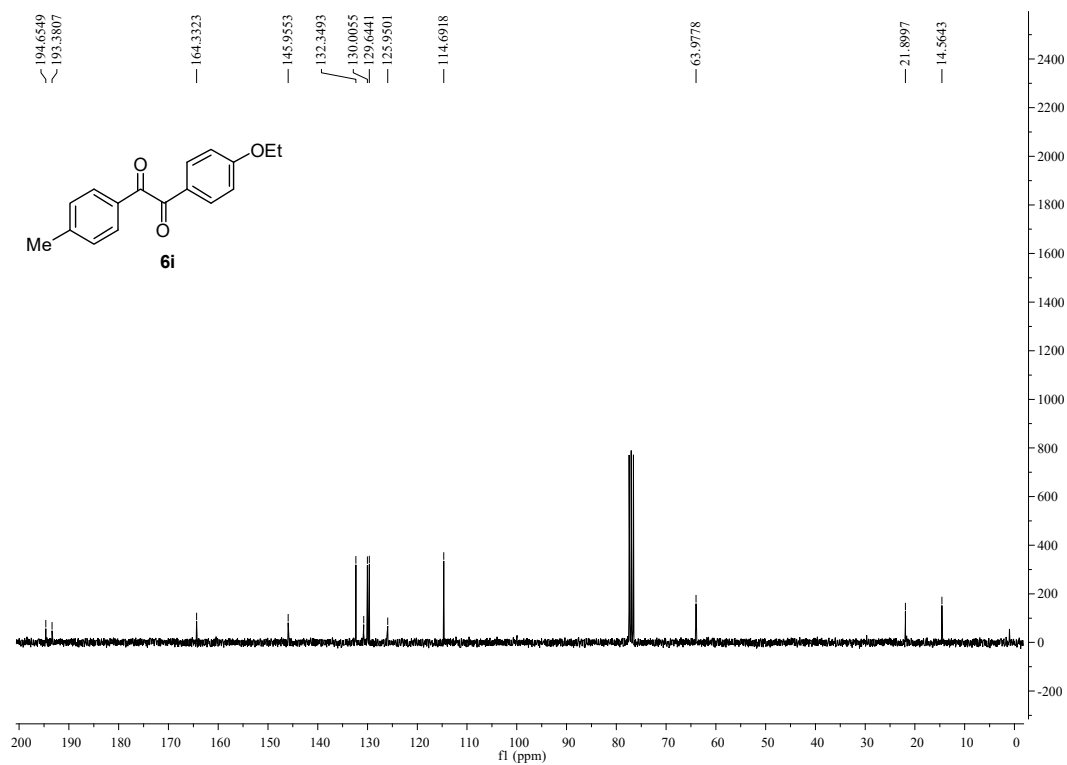

---

## 11. Gaussian archive files

### Chlorostyrene

$\alpha$ -chlorostyrene

16

0 1

C -4.7212755314 -4.0234029743 -2.0334508391

C -3.9549264377 -3.0205517242 -1.6085458674

H -4.1984995959 -2.4520608901 -0.7179716683

H -3.0470717486 -2.765686904 -2.1477628245

C -4.4922098195 -4.8294575834 -3.2438206037

C -3.9519719139 -6.3335842702 -5.5433057119

C -3.8625434619 -4.2438841693 -4.3488135491

C -4.8647229571 -6.1746279257 -3.3175096866

C -4.5912254287 -6.9202376947 -4.4565018848

C -3.5909637959 -4.9912250203 -5.4861154311

H -3.6094841787 -3.1863650148 -4.3205183704

H -5.3654429898 -6.6372126015 -2.4708304463

H -4.881166702 -7.9674175541 -4.4945257942

H -3.1081449087 -4.5183997546 -6.3379044554

H -3.74505757 -6.9175869025 -6.4366916483

Cl -6.1403689601 -4.4534560163 -1.0788472189

O2t

2

0 3

O 0.6690802635 -0.37854889 0.

O -0.5373048235 -0.37854889 0.

pdt1

17

0 1

---

C -2.5905648175 2.4968355966 -0.8775333903  
H -3.630164677 2.8115684323 -1.0104974127  
H -1.929356808 3.1199838435 -1.4811333685  
C -2.3663874706 1.0473118813 -1.2808762721  
C -3.2526722469 -0.0084121577 -0.7300490082  
C -4.8816061278 -2.0765962608 0.1830647806  
C -4.3423384207 0.2682831625 0.1010398264  
C -2.9880802336 -1.3314410385 -1.0986121579  
C -3.7965999301 -2.3605126233 -0.6432052432  
C -5.1538748944 -0.7636757233 0.5537043505  
H -4.5558798293 1.2886068845 0.4108419403  
H -2.1382540691 -1.5218171018 -1.7490421625  
H -3.5852185957 -3.3870465551 -0.9317285607  
H -5.9992142668 -0.5431699246 1.2003722844  
H -5.5175252801 -2.88310906 0.5405495448  
Cl -2.1627469126 2.7622512139 0.8510055286  
O -1.4776784199 0.7962704304 -2.0703696794

cpx1

11

0 5

Cu -0.3611327963 0.2770481804 -2.1900014019  
Cl 0.1014476902 2.2771738724 -3.3165223359  
Cl 0.2503947176 -1.7609349535 -3.1637062718  
Cl -0.9063511499 0.3467424035 0.0877366274  
O 1.3837388753 0.3637008892 -1.6234380455  
Cu 2.2898851002 -1.1262101688 -2.2011387079  
Cu 1.4297117028 0.433169622 0.2111414034  
Cu 2.1764689195 1.8696603594 -2.3140795601  
Cl 3.6719876088 0.3833324791 -3.335449754  
Cl 2.6649911667 -1.5508438813 0.0701838312  
Cl 2.519856165 2.4861621975 -0.0817247849



---

cpx2

27

0 5

Cu 0.8883331645 -0.9134453931 -1.3584883658

O 0.6555877944 0.1462704639 0.1721087932

Cu 0.8576009663 -0.7476197355 1.7814399196

Cu -0.8920920253 1.1288344164 0.5698312429

Cu 1.8731347711 1.5238422819 -0.3993441803

Cl -0.1979483198 0.8802287997 2.8487169076

Cl -0.8160872311 -1.7153363248 -2.285291919

Cl -0.190736787 2.6054712798 -0.9608441744

Cl 3.2492858183 3.1061259252 -0.1613611354

Cl 2.9683602583 -0.2164930069 -1.5080850343

C -4.0224110588 -2.4351886494 -0.6093167382

C -3.2221222314 -1.6060428503 0.0537568649

H -3.943830655 -3.510991565 -0.4999563841

H -4.7846853131 -2.043596509 -1.276771702

C -3.2345289615 -0.1400786996 -0.0611780838

Cl -2.0362150111 -2.2704848503 1.1707932086

C -2.9361101143 0.6784417108 1.0465138188

C -3.5748772413 0.4737744296 -1.2714710341

C -2.9476474375 2.0794625604 0.9186912238

H -2.8032478031 0.2280153953 2.0279029615

C -3.6565555061 1.8607414119 -1.3739880121

H -3.7492919166 -0.1471473369 -2.1464820275

C -3.3416260012 2.6680708916 -0.2909302195

H -2.7638065476 2.6946013156 1.7979534027

H -3.9286614861 2.3105828719 -2.3242607957

H -3.3598389811 3.7496967688 -0.3843440846

Cl 1.7084858561 -2.647819602 1.6001685473

TS1

27

---

0 5

Cu 0.431551 -1.130848 -1.307235

O -0.577143 -0.044896 -0.175249

Cu -0.540954 1.691732 -0.905943

Cu -0.631344 -0.430518 1.690564

Cu -2.321403 -0.652546 -0.404588

Cl -0.037484 3.732041 -0.524838

Cl 2.2817 -2.484421 -1.194078

Cl -2.828394 -1.010528 1.863324

Cl -2.858709 1.354358 -1.271295

Cl -1.356357 -2.55509 -1.364866

C 3.527657 -1.546289 0.371181

C 3.113162 -0.236303 0.672952

H 4.448006 -1.660455 -0.192031

H 3.328027 -2.33584 1.08879

C 2.077555 0.091582 1.589268

Cl 3.911584 1.023851 -0.202924

C 1.696983 1.429613 1.850154

C 1.327762 -0.944161 2.245598

C 0.667159 1.713033 2.735686

H 2.182246 2.243375 1.318306

C 0.466238 -0.645839 3.322778

H 1.579687 -1.987587 2.073384

C 0.058754 0.696935 3.489926

H 0.344725 2.742858 2.859319

H 0.08716 -1.429993 3.973352

H -0.686233 0.943567 4.241252

Cl 1.153792 0.74185 -2.289837

cpx3

27

0 5

Cu -0.8796850923 -1.1649111284 0.260301717

O 0.6804124008 -0.1678314944 0.1525480033

---

Cu 0.8609112039 0.6560216449 1.8280506912  
Cu 1.2765504823 0.487779914 -1.5504739782  
Cu 2.0162011246 -1.4580435617 0.0625316429  
Cl 1.1171604115 2.4512756266 2.9416437794  
Cl -2.9377204212 -1.2979538208 -1.1031468709  
Cl 3.0743651543 -0.8971542891 -1.8901557342  
Cl 2.6492796017 -0.8589691644 2.1318281941  
Cl 0.1922968431 -2.9845510201 -0.4544463668  
C -3.1359270329 0.3935742495 -1.9506279854  
C -2.4719350279 1.4728897638 -1.2303191687  
H -4.2197644795 0.502358825 -1.9771127278  
H -2.7433112791 0.2091163049 -2.9503890093  
C -1.1406418206 1.8985300606 -1.4466222854  
Cl -3.4296954736 2.1941142861 0.013238001  
C -0.5128393056 2.853080498 -0.6108000296  
C -0.3496177913 1.3305060448 -2.5077911613  
C 0.8043194296 3.2331883312 -0.8306827622  
H -1.0500528716 3.2565713196 0.2429792084  
C 0.8985291848 1.8919451848 -2.8642510287  
H -0.8112382044 0.6484955342 -3.2181249075  
C 1.5144757833 2.7788572724 -1.947237868  
H 1.2825450692 3.9066955524 -0.1245849812  
H 1.359874119 1.6718854094 -3.8243052587  
H 2.5129943324 3.1547352059 -2.1516634611  
Cl -1.4861633405 0.0215294508 2.0164563475

cpx4

29

0 5

Cu -0.1557093986 -1.7193097693 0.0759140737  
O 0.6131508928 0.0408716934 0.2413227944  
O -1.3860932642 -3.1292805869 0.4973396814  
Cu 1.0462439516 -0.0384634687 2.0432861671  
Cu 0.2042589432 1.8083847584 -0.2043592638

---

Cu 2.1285093866 -0.3125389338 -0.9031488754  
Cl 0.7049489054 1.9472944672 2.7750541016  
Cl -2.8492228045 -1.6936402749 -2.0822437215  
Cl 2.1707430438 2.1142479183 -1.1549147117  
Cl 4.1478418203 -0.7966556885 -1.3240586317  
Cl 0.8471425669 -1.9347816808 -1.9235340717  
O -1.7910117184 -2.0692702307 1.1164049641  
C -3.9816396062 -0.8115136995 -1.0050802922  
C -3.3180493852 0.1864600373 -0.1059117388  
H -4.4949627762 -1.5626140126 -0.4025206776  
H -4.7207631476 -0.3160109037 -1.6462076234  
C -2.4464388377 1.1830568089 -0.4872442995  
Cl -3.8583916499 0.0939751637 1.5250080139  
C -1.7806774917 2.0175018197 0.4907779839  
C -2.14159439 1.4414719579 -1.8734005598  
C -1.1776777939 3.2276483744 0.1216294118  
H -1.9275192319 1.8176209392 1.5484833042  
C -1.318403087 2.4720352514 -2.2184566977  
H -2.5735239178 0.8161311278 -2.6474604807  
C -0.7671969197 3.3420615716 -1.2186872368  
H -0.8394024759 3.930436316 0.8788983881  
H -1.0537775699 2.6387472319 -3.2577238198  
H -0.1576105492 4.1864723406 -1.5270533824  
Cl 1.4409385046 -2.1317525286 2.2155192003

TS2

29

0 5

Cu 0.286451655 -1.248451569 -0.7738726494  
O 0.7322435125 0.2227960293 0.3768942109  
O -0.9712965732 -2.6286695495 -1.1738646565  
Cu 1.0549299621 -0.7681139927 1.9118722869  
Cu -0.3929439284 1.6135820305 0.9133636883  
Cu 2.1996034939 1.0435939221 -0.5599710147

---

Cl 0.3062589509 0.52539074 3.4579679421  
Cl -1.8460436015 -0.4610450221 -3.1920244737  
Cl 1.1542088397 3.0729009899 0.2977127941  
Cl 4.1659991914 1.7362565293 -0.9358351781  
Cl 1.7398435789 -0.444297285 -2.2749932558  
O -1.4698057323 -1.8894802681 -0.1972254816  
C -3.1689588553 -1.1282615354 -2.1868323828  
C -3.1045058235 -0.7477470268 -0.7451736188  
H -3.0855285727 -2.2190764084 -2.2495557687  
H -4.1249863202 -0.8223906915 -2.6277353551  
C -2.7263368054 0.5279808235 -0.2064888103  
Cl -4.2330522766 -1.6792871604 0.1912308211  
C -2.468266561 0.6513306511 1.1866734814  
C -2.6095609745 1.6891102752 -1.0146460094  
C -2.2507299148 1.9023987861 1.7774907918  
H -2.5384991828 -0.2275677093 1.8238862299  
C -2.2655938173 2.8977114195 -0.450798078  
H -2.8083129771 1.6341717484 -2.0787870666  
C -2.0288151882 3.0114995541 0.9414718677  
H -2.1501710293 1.9843861284 2.856002996  
H -2.1550838576 3.7763419893 -1.0791038182  
H -1.7945911942 3.9795676069 1.3743359996  
Cl 1.6914970015 -2.6439750055 1.127636508

cpx5

29

0 5

Cu 0.3400889278 -1.4787652592 -0.6311803198  
O 1.035599097 -0.0355397409 0.4268642865  
O -1.0903288139 -2.6244444663 -0.9063197755  
Cu 1.3781669156 -1.0012052217 1.9576377928  
Cu -0.1642812063 1.2373876868 1.1267676581  
Cu 2.1347207387 0.7917954199 -0.9115374981  
Cl 0.601684291 0.6095871033 3.2654033588

---

Cl -1.1932634346 0.0111512858 -2.8099371419  
Cl 0.4818307055 2.6077152793 -0.466457519  
Cl 3.6816634566 1.9066733198 -1.8226448028  
Cl 2.1218725887 -1.2530368116 -1.9778501169  
O -1.6281487819 -1.5610381399 -0.0864075852  
C -2.6326254261 -0.8730203589 -2.203670702  
C -2.6865456189 -0.8586876198 -0.6905068305  
H -2.5545591736 -1.9058898927 -2.542731781  
H -3.5257857226 -0.4054680185 -2.621446895  
C -2.7096475682 0.4998765297 -0.0308896903  
Cl -4.2428471232 -1.7343756001 -0.2762135002  
C -2.275450962 0.6221541494 1.2994204151  
C -3.1305720658 1.6395832288 -0.7092529581  
C -2.1813090234 1.8924474029 1.8972387728  
H -2.0966184294 -0.2744995773 1.893562331  
C -3.0729203509 2.8941238873 -0.104927193  
H -3.4832448453 1.5687924029 -1.7341809289  
C -2.5889455672 3.0296946228 1.1862108477  
H -1.9421091152 1.9662940474 2.9561840392  
H -3.3911061354 3.7698743598 -0.6623230769  
H -2.522357728 4.0093173633 1.6501416704  
Cl 1.7061433709 -3.0301793821 1.5586591428

TS3

29

0 5

Cu 0.8243774624 -0.9154658683 -1.2975047386  
O 1.1365592685 -0.2069749239 0.4368603704  
O -0.6662961076 -1.8812071861 -1.8404532339  
Cu 1.5370492875 -1.8027042792 1.2699697484  
Cu -0.5211326506 0.2015292668 1.2563668826  
Cu 2.026961685 1.4399781401 -0.0075262437  
Cl 0.0293105523 -1.475042377 2.8506038233  
Cl -1.1796434168 1.3033536311 -2.6238159901

---

Cl 0.0170519037 2.3442070469 0.9906639852  
Cl 3.3822650219 3.0577234771 0.0966457143  
Cl 2.3496961639 0.4559474353 -2.1101589556  
O -1.3279971975 -1.1584641659 -0.7730343085  
C -2.4663206223 0.0544354466 -2.5387670128  
C -2.5310743643 -0.5683899703 -1.1612894486  
H -2.2176422347 -0.7231986487 -3.2614957996  
H -3.4218051058 0.5150715241 -2.7984842608  
C -2.868129723 0.3323084348 0.0017811792  
Cl -3.8299503724 -1.8593127093 -1.2970957396  
C -2.6331871493 -0.1729022572 1.3023484943  
C -3.3345831327 1.6292980347 -0.1474145838  
C -2.8140133058 0.6561419003 2.4182066172  
H -2.4977477417 -1.2458833136 1.4410293461  
C -3.5396293846 2.4330836125 0.9756560638  
H -3.5106036844 2.0451643585 -1.1349725047  
C -3.2570322566 1.9666689786 2.2511619072  
H -2.639986577 0.2519528715 3.4130444569  
H -3.8955922062 3.4502821824 0.8388468259  
H -3.3893134608 2.6122587075 3.1138523617  
Cl 2.621285349 -3.0019263492 -0.0679589561

cpx6

29

0 5

Cu 1.066449154 -1.3495844724 -1.0822168507  
O 1.0475549113 -0.1054975304 0.3856671361  
O -0.4952107173 -2.2519054147 -0.716452175  
Cu 1.3462255576 -1.3780232287 1.6961199899  
Cu -0.6648072017 0.4836706794 0.8740394637  
Cu 2.0530249276 1.3722644761 -0.2630768488  
Cl -0.1420238126 -0.6141083518 3.0964469931  
Cl -0.9411668167 0.0879252923 -2.8646909299  
Cl 0.0418929349 2.5385858912 0.3419363963

---

Cl 3.4689139771 2.9309552041 -0.4501170999  
Cl 2.6552979619 -0.157882492 -2.0157298493  
O -1.3324054769 -1.2544745632 -0.1308139908  
C -2.2865705895 -0.9884585562 -2.3476941928  
C -2.490652132 -0.9507227365 -0.8486351849  
H -2.0199384789 -2.0033389732 -2.6426495024  
H -3.1960075526 -0.6786298562 -2.8666555526  
C -2.9152115706 0.3560121264 -0.2170526654  
Cl -3.774245466 -2.2188147435 -0.535987238  
C -2.831038006 0.4462358134 1.1943076252  
C -3.3017395684 1.46950613 -0.9516217172  
C -3.1208779612 1.6583420694 1.8326438328  
H -2.7463263279 -0.4643419233 1.7880447035  
C -3.5903250848 2.6647343059 -0.2967475858  
H -3.3521760274 1.4315996814 -2.0358599072  
C -3.4826811178 2.7716203143 1.0858619197  
H -3.0544210581 1.7126584207 2.916437767  
H -3.8797171681 3.5318697152 -0.8838529972  
H -3.6884004159 3.7173231255 1.5778035837  
Cl 2.6083781259 -2.809478403 0.7550888768

cpx7

29

0 5

Cu -0.1436305167 -0.4131462514 -1.1514775958  
Cl -1.0549122956 0.9803813383 -2.5571164812  
Cl 1.9155893644 -0.7775725341 -2.3801472578  
Cl -2.0050226683 -1.0782675501 3.213221423  
O -1.3390124382 0.1038808958 0.2538268066  
Cu -1.736698489 1.8892858296 0.5373864104  
Cu -0.7729487525 -1.1366512479 1.532276206  
Cu -2.857772105 -0.2998336472 -0.7505857893  
Cl -3.8837284598 1.5554256803 -0.0509760967  
Cl -0.0730771311 2.977594445 1.1863281801



---

Cl -2.4125880406 -2.3281384839 -1.2350206396  
C 2.7981722821 -1.7591082903 -1.1263510955  
H 3.8131715422 -1.8951883394 -1.5031148275  
H 2.2701985103 -2.7096730518 -1.0567276302  
C 2.8248006768 -1.0196942552 0.2068312489  
C 3.7125773716 0.201459454 0.2121277663  
C 5.3555680683 2.4505089969 0.0859202686  
C 5.1016011336 0.0569736132 0.2013869543  
C 3.1509137431 1.4779064398 0.1522405634  
C 3.9749979895 2.5965346805 0.0971309141  
C 5.9169457989 1.1771980344 0.13421936  
H 5.5462799024 -0.9340369033 0.2662265039  
H 2.0731940248 1.6176285547 0.1617469329  
H 3.5216610986 3.5839567914 0.0643173968  
H 6.9968584893 1.054853451 0.1297616852  
H 5.9974685875 3.3265740127 0.0418195627  
Cl 3.4497645169 -2.3136583707 1.3601058478  
O 1.5680461905 -0.6032069326 0.6196254798  
O 0.567172606 -1.5787573597 0.2458859025

TS4

29

0 5

Cu -0.5830584061 -0.8674635501 -0.7654190934  
Cl -2.3508279535 -1.1659221033 -2.0794151923  
Cl 1.1311500862 -1.7479866826 -1.9075119952  
Cl -1.4911590205 1.6118849571 3.2570529384  
O -1.5375585386 0.4173995451 0.2391514119  
Cu -1.8957691235 2.1275597753 -0.3621909699  
Cu -0.882320747 0.0719796075 1.9671554173  
Cu -3.2429521935 -0.3311453824 0.1204818963  
Cl -4.0889636304 1.774320636 -0.3021924171  
Cl -0.0505624947 2.9568941673 -0.9400313176  
Cl -2.938528299 -1.7997991754 1.6951800671

---

C 2.4065036909 -2.2793198289 -0.030163564  
H 3.2113694006 -2.7015085591 -0.6183310499  
H 1.6084397491 -2.910117662 0.3313499908  
C 2.5373068507 -0.9092209837 0.4338335107  
C 3.5554265268 0.0094896629 -0.0883786428  
C 5.3880404598 1.7483412485 -1.2439692337  
C 4.8707824814 -0.4133437687 -0.3173087001  
C 3.1625560279 1.306902417 -0.4388642021  
C 4.0836103028 2.1693702766 -1.0171142792  
C 5.7796172094 0.4566899308 -0.893922502  
H 5.1889231253 -1.4059306894 -0.0079938553  
H 2.1356801135 1.6353246637 -0.2957284407  
H 3.767704769 3.1704431505 -1.2975279516  
H 6.8019687729 0.1310641043 -1.0635348599  
H 6.1066752827 2.4264575388 -1.6968282306  
Cl 3.4346607697 -2.2060708543 1.9503167616  
O 1.4944846103 -0.2835284476 0.9389629519  
O 0.3310231776 -1.1151329938 1.0300205518

cpx8

29

0 5

Cu 0.2811077781 0.2891633971 1.3261615119  
Cl 2.1942615055 0.4287196636 2.6223343052  
Cl -1.4492080326 1.0069420733 2.4169314455  
Cl 0.0137001405 -2.7771927264 -2.3978082069  
O 1.4586206911 0.1388423673 -0.1412654061  
Cu 1.8637929474 1.7481775972 -0.9625149645  
Cu 0.864243798 -1.4675906793 -0.9681875476  
Cu 3.1000363314 -0.2545532743 0.6288053702  
Cl 4.0156727317 1.6707910348 -0.5764382375  
Cl 0.0056087901 2.593968581 -1.4812194556  
Cl 3.0835237664 -2.1938744465 -0.4951842991  
C -3.0693708078 -1.4881510958 1.4210816977

---

H -3.8107778807 -1.139527916 2.1400005342  
H -2.1449906081 -1.7503871615 1.9280977889  
C -2.8443684813 -0.4774299177 0.3501142812  
C -3.8534969847 0.4231842307 -0.1309629784  
C -5.7870280309 2.1835233449 -1.054233101  
C -5.2033821994 0.2259324922 0.2120509405  
C -3.4790623249 1.5180609605 -0.9336354565  
C -4.4501093865 2.3917470508 -1.3877139017  
C -6.1635609423 1.102338559 -0.2576861222  
H -5.5008387988 -0.6294831328 0.8129367451  
H -2.4286929427 1.6913190552 -1.1611957573  
H -4.1634488385 3.2450787047 -1.9948680111  
H -7.2082870568 0.946925574 -0.0057134715  
H -6.5451724508 2.8751013863 -1.4130218373  
Cl -3.6844665774 -2.9529655328 0.5767477116  
O -1.7493201925 -0.4721346524 -0.3340383744  
O -0.6743549436 -1.1344365372 0.2936697963

TS5

29

0 5

Cu -0.1288501015 0.3209399512 1.248850493  
Cl -2.1206610795 0.0961348105 2.4733857112  
Cl 1.4453456712 0.479861908 2.701897114  
Cl -0.9697278654 3.463150554 -0.0672459867  
O -1.1597523963 -0.3739656666 -0.2167708983  
Cu -1.1806227829 -2.0350609973 -1.0322037785  
Cu -1.2924105099 1.4286064977 -0.8433761435  
Cu -2.9128798095 -0.3519520624 0.4206326124  
Cl -3.2137381072 -2.5692144132 -0.3231849551  
Cl 0.4768657236 -2.6868283353 -2.1278845254  
Cl -3.4853011312 1.1555111038 -1.252113625  
C 3.1413011812 2.0021008136 0.3041842173  
H 3.9414910137 2.0162461362 1.0445994546

---

H 2.2769698125 2.5616279708 0.6568867598  
C 2.752514912 0.5976395156 -0.0635947435  
C 3.7221860231 -0.4843811484 -0.0161396152  
C 5.5295597678 -2.591191131 0.0563189779  
C 5.098728802 -0.2243166172 0.0747303016  
C 3.2615355945 -1.8092193835 -0.0660723769  
C 4.1644288244 -2.8564818596 -0.0263445824  
C 5.9956282679 -1.2786016924 0.1039754842  
H 5.4694553003 0.7973400536 0.0871330818  
H 2.1941413898 -2.0015919883 -0.1304616484  
H 3.8038938781 -3.8804639023 -0.0604981981  
H 7.0617298157 -1.0796759409 0.163164366  
H 6.2385512154 -3.4148198589 0.0857197715  
Cl 3.7278981595 2.7728648599 -1.2109961478  
O 1.5991344358 0.3312075168 -0.4812185676  
O 0.462294995 1.6962613057 -0.1876345528

TS3a

29

0 5

Cu -0.375273211 -0.7317708375 0.57191497  
Cl 1.1670809044 -3.0841841373 0.0477052832  
Cl -0.1279194599 -0.2471533672 2.600556154  
Cl -0.5186187613 2.2424191429 -1.857650788  
O 1.2447556109 0.0427800224 -0.0004687413  
Cu 2.2381553889 1.1251905536 1.1708031294  
Cu 0.9295771635 0.711997637 -1.7327275935  
Cu 2.4480943294 -1.3635302651 -0.2944410292  
Cl 3.9780576604 -0.2722792998 1.0496774181  
Cl 1.6741164643 3.0574531529 1.701147037  
Cl 2.6077923277 -0.4184135943 -2.5680834501  
C -2.1032118048 -1.4778296671 0.8188210849  
H -2.5366570665 -1.3567408704 1.8075750394  
H -1.846338683 -2.5134495547 0.5695683937

---

C -2.8096734941 -0.7700392988 -0.2427181355  
C -3.8332965436 0.2257542526 -0.0673005757  
C -5.7592811131 2.1788003497 0.3225179278  
C -4.7447082015 0.1074765221 0.9980228598  
C -3.8955354886 1.3284779454 -0.9387544546  
C -4.8601006472 2.3011429464 -0.7323300244  
C -5.7021319156 1.082479843 1.1875729628  
H -4.7168911975 -0.7682119641 1.6421593436  
H -3.1553978113 1.4389712044 -1.7276721601  
H -4.8991919737 3.1659259455 -1.3876128397  
H -6.4125693248 0.9944420224 2.003996065  
H -6.5108830014 2.9478489817 0.480918402  
Cl -4.1066221272 -2.6365855384 -1.0907457475  
O -2.1771233542 -0.7390097944 -1.4360845616  
O -0.8255896693 -0.8703043328 -1.2512199695

cpx9

29

0 5

Cu 0.3459227875 0.4112459023 -1.7938461586  
Cl -1.0125375096 2.3279069002 1.5343511059  
Cl 0.1261362298 -1.4265433936 -3.0747767539  
Cl -1.8358292113 -3.8688403023 2.6188294424  
O 0.5968204525 -1.2078758079 0.87713934  
Cu 0.951624282 -1.777657493 -0.8576132621  
Cu -0.535761145 -2.492402648 1.6268152126  
Cu -0.1086939612 0.4102525326 1.257443064  
Cl 2.5443777814 -0.2268814757 -1.3455420852  
Cl 0.0037861301 -3.7026002279 -0.3145747881  
Cl -1.0648371529 -0.5263316297 2.9369525641  
C -3.1387760142 2.7304681336 -2.2243162038  
H -4.2172347756 2.6125632193 -2.1052055386  
H -2.8901981818 2.9338535277 -3.2683524403  
C -2.3712716641 1.5125135609 -1.7734837394

---

C -2.961437793 0.5884378986 -0.8174963975  
C -4.0160454966 -1.1836235524 1.0530347271  
C -3.8932155576 1.038246186 0.1318859496  
C -2.5955587134 -0.7683553774 -0.8440905942  
C -3.135175449 -1.6512541198 0.0776342786  
C -4.3969231664 0.1563260831 1.0750631803  
H -4.1651465872 2.0909588861 0.1744094183  
H -1.9382363245 -1.1371561219 -1.6292672164  
H -2.8786926859 -2.7085477279 0.0403513875  
H -5.0797661339 0.5161266657 1.838855372  
H -4.3961032672 -1.8765257311 1.7997768943  
Cl -2.6089102816 4.1323424023 -1.2450844922  
O -1.2469142075 1.3602895336 -2.2824378944  
O 0.6315986163 1.2350661765 -0.158455372

cpx10

28

0 5

Cu 0.9740656576 -0.6375155558 -3.9472573674  
Cl 3.0420840074 3.2706997214 -3.6317871337  
Cl 0.5564359912 -2.7600452786 -3.5611268576  
Cl 0.2726792316 0.5121505862 1.5433049476  
O 1.716354406 -0.1014434823 -2.1042415377  
Cu 2.570139389 -1.7893341621 -2.182805496  
Cu 1.2597227775 0.0442674717 -0.2773552802  
Cu 2.4080804482 1.4560747876 -2.7681088756  
Cl 3.8420549395 -1.3572420345 -3.8757637131  
Cl 1.9635376336 -2.1739780091 -0.0992576006  
Cl 2.384822119 2.1758648742 -0.7455228449  
C -1.8010095655 -0.2558293389 -2.9240230454  
C -2.9980936599 -1.8650446637 -0.9883067828  
C -1.6235873676 0.0238408061 -1.5595878132  
C -2.6137693695 -1.3342651199 -3.303269331  
C -3.2138236892 -2.1259951305 -2.338935122

---

C -2.2072790722 -0.7871532442 -0.598740391  
H -1.0321781864 0.884782265 -1.2477492915  
H -2.7849479216 -1.5427165772 -4.3562589363  
H -3.8473738745 -2.9547945299 -2.6414535063  
H -2.0265323838 -0.5731861671 0.4519480369  
H -3.4554995939 -2.4990678051 -0.2336713393  
O 2.1300670772 0.7398008132 -4.4106135205  
C -0.6424977552 -0.0330919199 -5.1475198382  
H -1.0060981489 -1.0084540344 -5.4659105666  
H -0.2322161659 0.6321290452 -5.9029665407  
C -1.0692583315 0.4814708421 -3.9474888553  
Cl -0.686878592 2.1480758406 -3.5985303973

TS6

28

0 5

Cu -0.0675868787 -1.2168568072 0.8417772512  
Cl -2.3329259856 0.0289091188 -2.9595941645  
Cl 1.3374982385 -1.013916086 2.4167879212  
Cl 1.6101387375 3.2778770229 1.3969610637  
O 0.827123081 -0.1016297252 -0.4035394113  
Cu 2.4027112099 -1.0625811059 -0.6330504751  
Cu 1.432772235 1.6341550235 0.0451688445  
Cu -0.7177875399 0.0890538879 -1.5469967009  
Cl 1.7111272562 -3.0605406945 -0.8167724725  
Cl 3.6260110929 0.718358414 -0.3457369853  
Cl -0.1880065502 2.2966751691 -1.5142426701  
C -2.748478343 0.1402446597 1.1240356062  
C -2.8173698484 2.8764420127 0.5981108116  
C -3.6766311819 0.6690650606 0.1955824021  
C -1.8753828523 1.027540749 1.810143797  
C -1.9162145477 2.378791051 1.5494635632  
C -3.7061211453 2.0249151272 -0.0593665101  
H -4.3143190306 -0.0032889306 -0.3704087157

---

H -1.149186516 0.6574154676 2.5311602579  
H -1.2109333843 3.0451763292 2.0400043522  
H -4.3841782589 2.4153756947 -0.81159678  
H -2.8092171111 3.9368908753 0.3607900697  
O -1.3380508369 -1.3317497721 -0.4542928188  
C -1.4649106072 -1.881946895 1.9902781459  
H -1.2879862523 -1.4608155507 2.98060406  
H -1.4636594949 -2.9715298683 1.9837533132  
C -2.5660702936 -1.2832271482 1.2529245813  
Cl -3.8078841922 -2.3334850794 0.7328226632

cpx11

28

0 5

Cu -0.2582408216 -1.4148693643 -0.8532293706  
Cl 2.4456075725 -0.2970239018 2.8442758853  
Cl -1.6299075061 -1.1185350888 -2.4265754886  
Cl -0.8094222017 3.1907697031 -1.375794391  
O -0.8795752359 -0.1678288853 0.5129358502  
Cu -2.5913708632 -0.8496135232 0.6997682672  
Cu -1.2054610804 1.626127041 0.1188649763  
Cu 0.7443870249 -0.1175634631 1.5308893661  
Cl -2.2769216777 -2.9215388429 0.9464888319  
Cl -3.4994928882 1.1042481586 0.2179167716  
Cl 0.2310311585 2.1208218701 1.814605948  
C 2.2630433411 0.0987244197 -1.1277083382  
C 2.4678034797 2.9139492387 -1.113538902  
C 3.0505734465 0.7856339909 -0.1591079587  
C 1.6272783837 0.8307577088 -2.1086506084  
C 1.7432158996 2.2374435664 -2.1242128742  
C 3.1174323274 2.1844087058 -0.141846979  
H 3.6146677257 0.2083207039 0.57018861  
H 1.0167117424 0.3569637279 -2.8734035175  
H 1.3376689189 2.7948203636 -2.962555049



---

H 3.6855723774 2.6762073187 0.6418624317  
H 2.5095452587 3.9989242683 -1.1246707592  
O 1.2483852059 -1.5642026669 0.2221760607  
C 1.1621295142 -2.0838564078 -1.924569944  
H 1.1259091218 -1.7542988584 -2.9599904574  
H 1.1676959588 -3.1665375432 -1.791983808  
C 2.0316584859 -1.3879423095 -0.9267252982  
Cl 3.648872331 -2.2102969301 -0.7539582551

TS7

28

0 5

Cu 0.9720475752 -1.4493982398 -0.5166435243  
Cl 1.189876747 1.5476387057 3.1449206576  
Cl 0.5097329242 -2.2920945961 -2.4004870215  
Cl -3.1909359864 0.9381359583 -2.1149373386  
O -0.5822221868 -0.6784676902 0.3026899258  
Cu -1.218175775 -2.3760088306 0.7288024749  
Cu -2.0529383123 0.1986227574 -0.4977809943  
Cu 0.2455600958 0.6313410419 1.4632956512  
Cl 0.6362951916 -3.3766944407 1.1454253275  
Cl -3.1960889054 -2.0636033953 -0.0098552053  
Cl -1.7582949949 1.6968718714 1.2073028115  
C 1.5836940538 1.6800479163 -0.8762374011  
C -0.0657809971 3.8813146603 -1.3110855004  
C 1.6767927946 2.8002481103 -0.0454905943  
C 0.6598876168 1.6674442974 -1.9259409962  
C -0.159989142 2.7710441819 -2.1418263035  
C 0.8519515065 3.8943313784 -0.2650086609  
H 2.3857187035 2.80616518 0.779359376  
H 0.5534007544 0.8021922466 -2.5810943056  
H -0.8902108114 2.7439274507 -2.9454106306  
H 0.9220292497 4.7557048994 0.3930248441  
H -0.7170150388 4.7352119654 -1.4749264785

---

O 1.9037942463 -0.2088582825 0.5768980858  
C 2.5586759578 -0.5828728314 -1.5760975134  
H 2.4464202845 -0.3519469823 -2.6322150265  
H 3.2142915627 -1.419637954 -1.322519445  
C 2.3732836565 0.4526192061 -0.5277403423  
Cl 4.1821732294 0.8788484156 -0.3471618723

cpx1a

27

0 5

Cu -0.2741326135 -0.5430459433 -0.6181601964  
Cl -0.0157739909 1.3359037309 -2.1484992846  
Cl 0.8447131928 -2.6732419934 -0.7276011683  
Cl -0.5834215759 0.3004538868 1.8671232384  
O 1.4480468337 0.0162232291 -0.1161560343  
Cu 2.6760706125 -1.3489530879 -0.2342777277  
Cu 1.6125882569 0.6530852688 1.6054048737  
Cu 2.094154028 1.3669647358 -1.1843899939  
Cl 3.7530647243 -0.1156304826 -1.907478187  
Cl 3.3047660308 -0.9532884828 1.9616253801  
Cl 2.5180000975 2.6490131634 0.6901839337  
C -2.0025660499 -1.2223801133 -1.5172123633  
H -1.7638135208 -2.253236811 -1.7662691249  
H -2.0822794559 -0.5293736299 -2.3512057586  
C -2.7364386251 -0.9828978651 -0.3785070026  
C -3.4090157658 0.2627774258 -0.0313677698  
C -4.6497890985 2.6855403453 0.5999313748  
C -3.934927547 0.4827288224 1.2505881328  
C -3.5183822657 1.2830850611 -0.9933791376  
C -4.1322563957 2.4819066571 -0.6768598774  
C -4.5499173588 1.6840942218 1.5603097153  
H -3.8382901859 -0.2851902302 2.0117121801  
H -3.1235002897 1.1438701972 -1.9955975262  
H -4.2085399302 3.2607875702 -1.4299968621

---

H -4.9450470191 1.8427337389 2.5594973785  
H -5.1305159279 3.628831418 0.8459762675  
Cl -2.8743831601 -2.304822833 0.7359395397

TS1a

29

0 5

Cu -1.1232120203 -0.9066134183 0.1070631902  
Cl 0.7495586007 -3.1721435443 0.3461808889  
Cl -1.8634619097 -0.9557763218 2.1587978005  
Cl 0.2931519787 2.4213494476 -1.8239474679  
O 0.4536514628 -0.0144324361 0.6314493824  
Cu 0.3340847762 0.8315767211 2.3057440526  
Cu 1.3074156172 0.8953321113 -0.7791967723  
Cu 1.6971853754 -1.3595721572 1.0478454806  
Cl 1.9590859758 -0.4191445404 3.1693696266  
Cl -0.705388895 2.6703301207 2.3190466297  
Cl 3.2183412778 -0.1197020304 -0.4234597299  
C -2.7390982757 -1.5927860143 -0.6328757888  
H -3.4912096791 -1.6474903931 0.1685820686  
H -2.5168333041 -2.6058463223 -0.9823891932  
C -3.2561511452 -0.745330542 -1.7031825519  
C -3.3069987292 0.6709835819 -1.6887605068  
C -3.2452596394 3.4570375004 -1.6382710533  
C -2.9083000077 1.3674781637 -0.5173906399  
C -3.6771842691 1.417773556 -2.8358670358  
C -3.6396392623 2.7927884346 -2.8054731838  
C -2.8905600416 2.7460096889 -0.4934045771  
H -2.6389293192 0.8217652267 0.3843449633  
H -3.955825091 0.8999579972 -3.7483507843  
H -3.8993994747 3.3615162814 -3.6929536238  
H -2.560685636 3.2545543711 0.4086826738  
H -3.2019504328 4.5430371302 -1.6288271499  
Cl -4.033650475 -1.5815914223 -2.9847047279

---

O -1.0306629669 -0.8106849656 -2.7016250803

O -0.3608374905 -0.790067225 -1.6379568903

cpx2a

29

0 5

Cu -1.121968803 -0.8720641111 0.1664397612

Cl 0.7133176951 -3.0933867979 0.1061876105

Cl -1.8539720322 -1.0007205179 2.1495757736

Cl 0.2126936899 2.1789686535 -1.9683592023

O 0.5238608894 -0.0308110179 0.6078603664

Cu 0.5164555705 0.8561393394 2.2597216168

Cu 1.3586972546 0.8481442803 -0.8191780307

Cu 1.7594319177 -1.3948534494 0.9704097392

Cl 2.0324863223 -0.5308377408 3.1113404767

Cl -0.5178945558 2.6791389944 2.2263297907

Cl 3.2920541639 -0.1177905886 -0.4598499869

C -2.7370273641 -1.5564048549 -0.52934377

H -3.6002234272 -1.4575627819 0.1275811733

H -2.4901832975 -2.605312564 -0.7267940538

C -2.8743251093 -0.7523857578 -1.7915590461

C -3.1309377262 0.7156309015 -1.7011413456

C -3.399213041 3.4844213275 -1.5986955895

C -3.0276048475 1.386661393 -0.4800835247

C -3.3503302609 1.4442074264 -2.8766344421

C -3.4936449463 2.8203955629 -2.8202924202

C -3.1616436667 2.7686928488 -0.4316638106

H -2.8518187701 0.8487279891 0.4488791374

H -3.4061005042 0.926965349 -3.8314973299

H -3.6664623082 3.3808888344 -3.7345968187

H -3.0632951446 3.275886936 0.524035792

H -3.5002381287 4.5656091576 -1.5600464996

Cl -4.0309463684 -1.6015179016 -2.862070321

O -1.5735701446 -0.912488062 -2.5197575915

---

O -0.5903600571 -0.8240358481 -1.6583264548

TS2a

29

0 5

Cu 0.2480630278 -1.1044494869 -0.7933320987

Cl -1.8593747083 -2.8906276217 0.2794933439

Cl -0.3682898676 -0.8887223529 -2.7966498109

Cl 1.4761889064 1.4947045464 2.58009058

O -1.0085676615 0.0734709182 0.0157795665

Cu -1.8367293874 1.4195352464 -0.9664092411

Cu -0.1558819779 0.540360847 1.6275700364

Cu -2.5247940662 -0.8521357158 0.5951289709

Cl -3.851452421 0.5417992598 -0.7843510882

Cl -0.4743908055 3.0037077171 -1.2244003045

Cl -2.1331173094 0.3776208784 2.6506756378

C 1.8358259718 -2.0079986522 -1.2622540099

H 2.1407168203 -1.8988224292 -2.3020814712

H 1.6257123458 -3.0511326871 -1.0025818765

C 2.7853337867 -1.3713568867 -0.2830023456

C 3.0972611218 0.0894743124 -0.4169930203

C 3.5989819615 2.837670333 -0.4474401372

C 2.5696064957 0.8767751464 -1.4327298934

C 3.8579885916 0.688246074 0.6058065811

C 4.1122738343 2.0584861843 0.578574331

C 2.8289105505 2.2483626578 -1.4497634776

H 1.9597821241 0.4494313802 -2.2254576778

H 4.2476781444 0.0746825743 1.4145088552

H 4.6916707822 2.5102472303 1.3783000216

H 2.4162683603 2.8539948833 -2.251300976

H 3.7834224017 3.9077558741 -0.4661894361

Cl 4.2899069242 -2.3563243675 -0.2355039344

O 2.2192569174 -1.5564698195 1.0411525583

O 0.9018851364 -1.2256970437 0.9609063169

---

cpx3a

29

0 5

Cu 0.236616 -1.407659 -0.617035

Cl -2.927822 -2.587255 0.978155

Cl -0.281104 -1.540611 -2.652559

Cl 1.481345 1.774145 2.323195

O -1.063434 -0.133144 -0.081514

Cu -1.663259 1.128793 -1.308759

Cu -0.111223 0.590264 1.39241

Cu -2.68889 -0.489673 0.764075

Cl -3.770581 0.662607 -1.236356

Cl -0.034987 2.488929 -1.602799

Cl -2.116152 1.320626 2.157678

C 1.892371 -2.28881 -0.840368

H 2.24881 -2.332895 -1.868964

H 1.735973 -3.288616 -0.423262

C 2.730307 -1.450124 0.088552

C 2.974103 -0.01089 -0.299045

C 3.460636 2.718259 -0.849389

C 2.653046 0.510506 -1.53177

C 3.533575 0.842337 0.681673

C 3.777866 2.206397 0.391549

C 2.89412 1.877374 -1.80929

H 2.195519 -0.102062 -2.306239

H 3.847382 0.421088 1.633543

H 4.206267 2.837481 1.164622

H 2.643281 2.262703 -2.793273

H 3.633168 3.765079 -1.077202

Cl 4.33592 -2.261769 0.304928

O 2.1419 -1.506802 1.371278

O 0.783638 -1.158364 1.13038

---

cpx6a

29

0 5

Cu 1.1073168533 -0.9616559052 -1.5001934792

O 1.2695780145 -0.1896592784 0.2080280264

O -0.7206830561 -0.7380032697 -1.5973431141

Cu 1.09251491 -1.662984444 1.3211566517

Cu -0.3455793726 0.6667601484 0.6521283808

Cu 2.6288228182 1.0966243584 -0.1259913291

Cl 0.1935970463 -0.6383043842 2.9910668636

Cl -5.0761852711 -0.8671607694 -1.4460692004

Cl 0.7998621834 2.5652329142 0.2820762871

Cl 4.3476889072 2.3030648297 0.0798718049

Cl 3.1233781308 -0.3230164689 -2.0440164124

O -1.2327858545 -1.0421797403 -0.2731414857

C -3.3226265383 -1.1933358634 -1.4842220486

C -2.633585077 -0.6940704815 -0.229224355

H -3.1655662485 -2.2716911325 -1.5608010078

H -2.8976962281 -0.7138155026 -2.3660457235

C -2.6798601935 0.7949017308 0.0541577637

Cl -3.2121599879 -1.6463911387 1.1778600165

C -2.308905863 1.2568354001 1.340717336

C -2.9278842814 1.7241397906 -0.954912652

C -2.2636721497 2.6341071595 1.601552114

H -2.2873471943 0.5597892175 2.177995699

C -2.8591202458 3.0860347025 -0.6791281933

H -3.1901773504 1.3954636324 -1.9556169314

C -2.5256124619 3.5463502922 0.5922913226

H -2.0006278166 2.9725627076 2.6000092591

H -3.0618773968 3.7976133883 -1.4747704876

H -2.4718490181 4.6124376558 0.7905897184

Cl 1.4888807417 -3.2719305489 -0.0336348238

---

TS4a

29

0 5

Cu 1.1687267207 -1.5587900359 -1.0658823072

O 1.2449319317 -0.1936187673 0.1913229565

O -0.838822877 -1.8522874412 -0.8279142329

Cu 1.5272713874 -1.2761148609 1.6712712351

Cu -0.40639898 0.5920952892 0.7335542709

Cu 2.2469884251 1.2047886498 -0.6692594804

Cl 0.5816539567 -0.1828585045 3.231818713

Cl -4.357505087 -0.4275221388 -2.5775120154

Cl 0.5544934585 2.5451073314 0.2150750891

Cl 3.8508725729 2.49367449 -1.1134683212

Cl 2.2053437176 -0.3485533102 -2.5599398116

O -1.2826704183 -1.2479969075 0.4026439261

C -2.139252598 -1.2617154583 -1.5778388639

C -2.5877659911 -0.7924449843 -0.2064092728

H -2.627043829 -2.1215915773 -2.0200111172

H -1.7750521179 -0.5152596256 -2.2827151951

C -2.6500089655 0.6684280967 0.1670844028

Cl -3.8706536276 -1.7410287741 0.5341856649

C -2.3522020768 0.9655056778 1.5270206966

C -2.9643958659 1.7015748486 -0.7166060591

C -2.4128896063 2.2922102059 1.9790236388

H -2.2999764371 0.1588060396 2.2615087265

C -3.0001716996 3.008567935 -0.2417472899

H -3.2362578504 1.4527296574 -1.7423986056

C -2.7269296944 3.3094751949 1.0929226916

H -2.1990575396 2.5051471918 3.0229198256

H -3.2497519387 3.8086761761 -0.9330493425

H -2.7640069095 4.338818074 1.4371029769

Cl 2.0932609395 -3.0655464722 0.5471681004



**Methylstyrene** $\alpha$ -methylstyrene

19

0 1

C -1.3436294194 0.4648959563 0.0963121672

C -1.8375605518 1.673082589 0.3898580887

H -2.9099937562 1.8521504272 0.4013235662

H -1.2012010109 2.5150204496 0.6498927362

C 0.1127740828 0.2039212518 0.0495449639

C 2.8816799554 -0.2950835383 -0.0174509278

C 1.0271005649 1.2309301856 -0.2206000017

C 0.6209687238 -1.0830395489 0.2615455578

C 1.9887221379 -1.3292456766 0.2350721541

C 2.3923411336 0.9873604849 -0.2491577212

H 0.6559130179 2.2301098321 -0.4384224674

H -0.0603544306 -1.9063787617 0.4639555471

H 2.3569142137 -2.3372802226 0.4119838588

H 3.0794858046 1.8018766103 -0.4670280355

H 3.9515302237 -0.4873098255 -0.0444013559

C -2.2648257591 -0.6874582272 -0.1802734231

H -2.0003235564 -1.1996478819 -1.1137138958

H -2.2191269024 -1.4401103305 0.6178229367

---

H -3.3029512316 -0.3502547336 -0.2512534183

ketone

17

0 1

C -0.654087723 -0.3498643254 0.5215171748

C 0.1832037915 -1.0075777004 -0.5460319132

H 1.2209863301 -1.0353518577 -0.2097537333

H -0.1625932625 -2.0289048546 -0.7444987338

H 0.1215016712 -0.4552434116 -1.4911116218

O -0.1476136481 0.0486830509 1.5535023272

C -2.1195887476 -0.1993280502 0.2816909463

C -2.7420496272 -0.64224378 -0.8879808953

C -2.8886009635 0.411468925 1.2763806514

C -4.1110254932 -0.4769163267 -1.0599735484

H -2.1594751766 -1.1198378353 -1.6728085903

C -4.2543263043 0.5767198387 1.1054491702

H -2.3815724114 0.7476382851 2.1773310412

C -4.8671957846 0.1322195269 -0.0640122047

H -4.5892005357 -0.8238708334 -1.9726567809

H -4.846553268 1.0527076704 1.8831984864

H -5.9385821472 0.2613438084 -0.1991077159

aldehyde

4

0 1

C -0.7103913817 -0.2888844706 0.5102195625

O -0.1794139481 0.1384651338 1.4982995243

H -0.1455517348 -0.8004274829 -0.3017900032

H -1.8066415479 -0.2050396255 0.33334325

---

cpx2b

30

0 5

Cu 0.6252869856 1.0806216534 1.538443797

O 0.6204587357 0.1985973059 -0.1157631958

Cu 0.5616523506 1.3123205431 -1.5955322875

Cu -0.554883727 -1.1618473286 -0.6577770919

Cu 2.2264207286 -0.8259863697 0.2115148713

Cl 0.0171411805 -0.3823539964 -2.8999567255

Cl -1.1096460549 1.3723597953 2.6760049069

Cl 0.6391940294 -2.5582327096 0.619458825

Cl 3.9979371534 -1.8387588673 -0.3310598622

Cl 2.8254723254 0.9911429593 1.5456949508

C -4.4842540454 1.2040160548 1.0972121391

C -3.4722896819 0.8321109547 0.3074631925

H -4.7411831265 2.2525328304 1.2195633471

H -5.0969021023 0.4837331825 1.633655837

C -3.114230693 -0.5923242655 0.1676545222

C -2.6546603467 -1.0992405031 -1.0633864277

C -3.216956164 -1.487611085 1.2459891867

C -2.2673162326 -2.4504546072 -1.190586156

H -2.6834227935 -0.4740311654 -1.9535201052

C -2.9065276961 -2.8355787042 1.1045923848

H -3.5205940191 -1.0992827816 2.2153473922

C -2.4284822952 -3.3249379274 -0.1049807986

H -1.9866149744 -2.8355274506 -2.1697636766

H -3.0007233544 -3.500717719 1.9579611286

H -2.1418041461 -4.3676475495 -0.2051642375

Cl 0.7331665016 3.3472084361 -1.1338347725

C -2.6514999302 1.8251711712 -0.4589106724

H -1.5824293719 1.6997594279 -0.2347535958

H -2.7782556925 1.7331738214 -1.5469727572

H -2.910109483 2.850894754 -0.1831833287

---

TS1b

30

0 5

Cu 0.4355208022 -1.1592343763 -1.3031357388

O -0.5423066299 -0.0366807004 -0.1871121348

Cu -0.4731996967 1.6803813913 -0.9332885495

Cu -0.6414320022 -0.467962695 1.680609459

Cu -2.2975575454 -0.6191018694 -0.3781517918

Cl 0.1823085895 3.685165445 -0.5802798506

Cl 2.2990447437 -2.52073844 -1.097523836

Cl -2.8546318073 -1.0264031944 1.8418453704

Cl -2.7821424255 1.3915059286 -1.2908008638

Cl -1.3577624935 -2.5604862204 -1.3382999768

C 3.4965646683 -1.5236521888 0.3717793892

C 3.0669398315 -0.1893772971 0.6200393501

H 4.4285255719 -1.6370932301 -0.1762131687

H 3.3495209463 -2.2809806115 1.1368797165

C 2.0573622421 0.088028598 1.5858952051

C 1.7006927044 1.421727754 1.8961427701

C 1.3051974973 -0.9532983788 2.2338748705

C 0.6872821374 1.70083478 2.8052258476

H 2.190260373 2.249131309 1.3902878521

C 0.4434082839 -0.6705306939 3.3159873446

H 1.5525883258 -1.9953441534 2.0432601257

C 0.0633047143 0.6764157349 3.5263926746

H 0.3895707346 2.7329396631 2.9671518427

H 0.0651303208 -1.4623379816 3.9581013129

H -0.6765350941 0.9123256713 4.286278515

Cl 1.1826541518 0.6514668235 -2.3735398029

C 3.7268740746 0.9126824078 -0.1487479298

H 4.438785162 1.4607037782 0.4844566637

H 4.2798481166 0.50987672 -1.0023029906

H 3.0078878528 1.6371140162 -0.5477507854

---

cpx3b

30

0 5

Cu -0.712147499 -1.4774905054 0.3338921758

O 0.5414477868 -0.1336273838 0.594686549

Cu -0.2157313444 0.8423785565 1.9403189962

Cu 0.7328238202 1.4850417042 -0.5059766037

Cu 2.2728507515 -0.8338800658 0.1685026188

Cl 0.0310700441 2.9429674546 1.9395993108

Cl -2.6975289262 -2.5001500928 -0.4914851031

Cl 2.9693184083 1.2995707095 -0.3020807304

Cl 4.0698722817 -1.9458743056 0.3662615469

Cl 0.8098020143 -2.5680924562 -0.8256472829

C -3.4318867459 -0.9900324478 -1.4744363185

C -2.7586560941 0.2494356525 -1.1147130079

H -4.4755705641 -1.0353904953 -1.1629675956

H -3.315628666 -1.328897459 -2.5028831557

C -1.6020524753 0.6816778685 -1.8065541724

C -0.9549017379 1.9207842007 -1.4306505141

C -0.9800448667 -0.0875694529 -2.8191823895

C 0.1547940832 2.4057897323 -2.1681617834

H -1.5139565381 2.6392200794 -0.8345878553

C 0.1562078144 0.3629253985 -3.4867156369

H -1.3769879434 -1.0641151311 -3.0861639786

C 0.7169010757 1.597070733 -3.1913134996

H 0.4431276896 3.4525176019 -2.0906085624

H 0.6077981286 -0.2670681134 -4.2475898273

H 1.5929995801 1.9473561759 -3.7300426927

Cl -1.5775423547 -0.8613823817 2.4017448833

C -3.3623241224 1.0535077718 -0.0046540907

H -3.9455541544 1.9007366722 -0.3943380659

H -4.0349767283 0.4410765368 0.6044929344

H -2.6144653476 1.4787883727 0.6770094815

---

cpx4b

32

0 5

Cu -0.2417128611 -1.6680196823 0.267493441

O 0.5241117157 0.0877740681 0.3185264148

O -1.273366544 -3.1265715336 0.962948404

Cu 1.1853310323 -0.0358296736 2.0441639754

Cu 0.1083123355 1.8551559892 -0.1123613491

Cu 1.8213023964 -0.2898037816 -1.0619448065

Cl 0.6087244212 1.81452831 2.9619018531

Cl -3.5500218029 -2.0564820347 -1.1627469182

Cl 2.0399413164 2.1384486245 -1.14343086

Cl 3.6514371949 -0.8663397845 -1.9644027018

Cl 0.2585762275 -1.7840395013 -1.912665108

O -1.4507042757 -2.1153033335 1.7490789843

C -4.3376532333 -0.4975329261 -0.7189472073

C -3.4511648614 0.2578626201 0.217535344

H -5.2820193584 -0.7489343431 -0.2277451881

H -4.558918759 0.0357793239 -1.6444231642

C -2.5802701038 1.2173966097 -0.2458637792

C -1.8223792791 2.0430459808 0.6749557444

C -2.342872205 1.4550970752 -1.6514726457

C -1.2600283383 3.2595331035 0.2567977543

H -1.9018301053 1.8752866116 1.7443217823

C -1.5130033223 2.4542953713 -2.0603110701

H -2.789524912 0.7995564059 -2.3936220845

C -0.9172014022 3.3485038415 -1.1042877435

H -0.8907505097 3.9803776585 0.9824591628

H -1.2689683168 2.5779198482 -3.1105492519

H -0.3281210792 4.1889296397 -1.4604473689

Cl 1.9058699285 -2.0439503093 1.975621388

C -3.6318226796 -0.0914287627 1.6508803298

H -4.5353262738 0.3978298561 2.0437236357

H -3.7859501681 -1.172276672 1.748967231

H -2.7871591778 0.1760174005 2.2903078021

---

TS2b

32

0 5

Cu -0.2633999126 -1.6290659904 0.373289419

O 0.7671218151 -0.0149737129 0.2754888753

O -1.9403904116 -2.4184163696 0.8911894592

Cu 1.0839332404 0.2245317509 2.0881015115

Cu 0.1979921589 1.6633660632 -0.3353675046

Cu 2.2478554976 -0.5295196769 -0.8419745093

Cl 1.1657115982 2.3650468488 2.2803588648

Cl -2.1408992897 -1.7409547559 -2.2262389793

Cl 1.9141496717 1.6976586685 -1.7422232412

Cl 4.2538065992 -0.8932016622 -1.4287391835

Cl 1.2150359771 -2.6019571015 -0.9929774733

O -1.9936947628 -1.111499507 1.083742151

C -3.5431071644 -1.2521611396 -1.2178955447

C -3.2975154936 -0.1187545074 -0.2765087704

H -3.8069049005 -2.1375181336 -0.6291151435

H -4.3807316322 -1.0293512664 -1.8918602292

C -2.4907257122 1.0130546458 -0.6239493679

C -1.9474208621 1.8450576143 0.3978690681

C -2.2096589838 1.3620890796 -1.9741083602

C -1.2759957392 3.0371726669 0.0947382748

H -2.1226127399 1.5990343572 1.4430396546

C -1.4382737052 2.4602104204 -2.271636187

H -2.6227222671 0.7702953116 -2.7832605963

C -0.8995580449 3.2708209915 -1.2398682978

H -0.9455120375 3.6952450241 0.8931851366

H -1.2086330058 2.6995558308 -3.3055343008

H -0.3100711826 4.1478113041 -1.4903785109

Cl 0.8919764046 -1.7323939477 2.9060716696

C -4.3400225918 0.0000017209 0.7870003273

H -4.0403454112 0.675785847 1.5915485841

---

H -5.2620054505 0.4059093412 0.345694119

H -4.5705378616 -0.9762052256 1.2241511949

cpx5b

32

0 5

Cu 0.2782791137 -1.4730638854 -0.6500417834

O 1.0074306024 -0.0348409175 0.4016672909

O -1.1352201678 -2.6562506924 -0.8806668246

Cu 1.3647645326 -0.9793589589 1.940963493

Cu -0.1626552288 1.2619223658 1.0878789697

Cu 2.1262544443 0.746712361 -0.9393289811

Cl 0.6528845984 0.6772018167 3.2318823181

Cl -1.1408684533 0.1353379218 -2.7358973917

Cl 0.4947651397 2.6055218589 -0.5253264056

Cl 3.677417566 1.8276683837 -1.8874398606

Cl 2.1219978537 -1.3360886263 -1.9281918499

O -1.6318567009 -1.5734031927 -0.0665783272

C -2.5715668569 -0.8090537005 -2.2029424857

C -2.7333766443 -0.8589094024 -0.6943237434

H -2.4395964325 -1.8250571155 -2.5768468198

H -3.454917305 -0.3597094765 -2.6640157735

C -2.7251582294 0.5038644712 -0.0257707055

C -2.264384025 0.628201274 1.2955371314

C -3.1683529607 1.650405858 -0.6820035394

C -2.167706706 1.8961317805 1.9018826805

H -2.0513091988 -0.2667493006 1.8812024801

C -3.1044854997 2.9021042404 -0.074332839

H -3.5421985152 1.5855791629 -1.7005150871

C -2.593561199 3.0349437418 1.2076363693

H -1.9028729626 1.9646006181 2.9550291021

H -3.4381937853 3.779004223 -0.6210812983

H -2.5217624564 4.0124817085 1.6752407417

Cl 1.675292485 -3.0287819757 1.6647864995



---

C -3.9991048856 -1.6402115859 -0.3692111346  
H -4.8844822147 -1.1415482794 -0.7787730883  
H -3.9236788196 -2.6499481826 -0.7858786183  
H -4.1148396984 -1.7209349439 0.7160036405

TS3b

32

0 5

Cu 0.7864407676 -1.0522637671 -1.2493876294  
O 1.1708368842 -0.1928366499 0.3937664043  
O -0.7170662664 -2.0635147868 -1.6308006493  
Cu 1.5560316689 -1.7067702089 1.3741117902  
Cu -0.5214733637 0.2468723159 1.0916787098  
Cu 2.0347103986 1.40992438 -0.2122460804  
Cl 0.0655741558 -1.2711250357 2.9288535147  
Cl -1.1954120975 1.1425099952 -2.6202530873  
Cl 0.0794593256 2.3859235327 0.8398443955  
Cl 3.3686866475 3.0464532516 -0.3335569557  
Cl 2.2963490206 0.2324560357 -2.2348684045  
O -1.3231788441 -1.2192032222 -0.6194329588  
C -2.47363674 -0.1038333298 -2.4586638919  
C -2.592744018 -0.6756517979 -1.0570910297  
H -2.2122390643 -0.9120098334 -3.1438643538  
H -3.4234214792 0.3402378922 -2.7708242545  
C -2.8806200142 0.3397674346 0.0334022499  
C -2.6248570801 -0.0409198386 1.3731265982  
C -3.357881704 1.6214184521 -0.2144085282  
C -2.8135698663 0.8766046286 2.41925395  
H -2.4710876123 -1.0925476988 1.6165656192  
C -3.5582301145 2.5152162433 0.8356375759  
H -3.5487174324 1.9533230034 -1.230609683  
C -3.2660704136 2.1606668002 2.1477911831  
H -2.6061448848 0.5631555767 3.4398650429  
H -3.9205117027 3.515693123 0.6154471175

---

H -3.3970264183 2.8775876535 2.9524385798  
Cl 2.6339144052 -3.0237916665 0.1398059322  
C -3.6174647962 -1.8003298057 -1.0839857359  
H -4.5920593843 -1.4274935979 -1.4175658883  
H -3.2787959806 -2.5868768362 -1.7648738493  
H -3.7359943964 -2.2338999334 -0.086854893

cpx6b

32

0 5

Cu 1.1071778759 -1.3485800069 -1.1133602856  
O 1.0499982504 -0.1185604058 0.3459930775  
O -0.4916931502 -2.2106863887 -0.81142178  
Cu 1.3053210786 -1.3756674484 1.6868446378  
Cu -0.7005675323 0.4617458968 0.6672485265  
Cu 2.0786169299 1.3698643357 -0.217917426  
Cl -0.1208440788 -0.6600693734 3.1375360739  
Cl -0.9351189236 0.3623445779 -2.7436228767  
Cl 0.0812319413 2.5381159018 0.4751625319  
Cl 3.4973946489 2.9300588254 -0.3714461443  
Cl 2.6931208387 -0.122371736 -2.0145351571  
O -1.3405085101 -1.2692046545 -0.1487183643  
C -2.2473831946 -0.8061540082 -2.3700549743  
C -2.5459590749 -0.9393634502 -0.8884693987  
H -1.9231709195 -1.7739268388 -2.7554414167  
H -3.1429141634 -0.4869763634 -2.9104323299  
C -2.9497108181 0.3532343567 -0.1927805706  
C -2.8193477104 0.4124461145 1.2160702431  
C -3.4281780068 1.4753038137 -0.8697741346  
C -3.1346191555 1.5914377929 1.9060628894  
H -2.628894036 -0.4954457241 1.7891550501  
C -3.7447418843 2.6326780834 -0.1696703559  
H -3.5296329413 1.4670384817 -1.9513941285  
C -3.5802642016 2.7042206994 1.2128125082

---

H -3.0121435911 1.6178268573 2.9858241595  
H -4.1029686114 3.501027291 -0.7158603909  
H -3.8079553266 3.6246535432 1.741993322  
Cl 2.5701403484 -2.8171328394 0.7385229484  
C -3.5566705588 -2.0566422301 -0.6971408992  
H -4.4816353221 -1.8448624872 -1.2447755912  
H -3.1333869099 -3.000212626 -1.0562423026  
H -3.7994910406 -2.1679273803 0.3633914792

cpx7b

34

0 5

Cu -0.610806 1.756989 -0.625293  
O -0.941365 0.153749 0.289834  
O 1.056180 2.084392 0.029890  
Cu -0.611010 0.380590 2.149157  
Cu 0.363774 -1.300477 0.492501  
Cu -2.401686 -0.677890 -0.510821  
Cl 0.131193 -1.564386 2.844877  
Cl 4.976277 0.417087 -0.855022  
Cl -1.349572 -2.636961 -0.471374  
Cl -4.362899 -1.389121 -0.947571  
Cl -2.607980 1.363847 -1.412081  
O 1.524009 1.266944 1.068941  
C 3.573889 1.369275 -0.139833  
C 2.596591 0.442085 0.590779  
H 4.033064 2.072352 0.558092  
H 3.116638 1.913970 -0.966136  
C 2.041804 -0.642214 -0.334188  
C 2.166126 -2.042888 -0.008024  
C 1.669945 -0.314216 -1.680492  
C 2.066076 -3.017019 -1.040073  
H 2.625254 -2.340153 0.932455  
C 1.486947 -1.296241 -2.639848

---

|    |           |           |           |
|----|-----------|-----------|-----------|
| H  | 1.521607  | 0.731782  | -1.948187 |
| C  | 1.716316  | -2.657354 | -2.329674 |
| H  | 2.232068  | -4.062416 | -0.793194 |
| H  | 1.179052  | -1.011459 | -3.642106 |
| H  | 1.603905  | -3.416296 | -3.098443 |
| Cl | -1.394893 | 2.339982  | 2.333152  |
| C  | 3.238788  | -0.080787 | 1.863963  |
| H  | 4.143122  | -0.659036 | 1.647938  |
| H  | 3.516392  | 0.776995  | 2.483059  |
| H  | 2.545282  | -0.694390 | 2.446517  |
| Cl | -0.073565 | 3.096783  | -2.231745 |
| Li | 3.716901  | -1.398643 | -1.836591 |

TS4b

32

0 5

|    |               |               |               |
|----|---------------|---------------|---------------|
| Cu | 1.1266523702  | -1.5326091061 | -1.1060704441 |
| O  | 1.2399686536  | -0.1885245679 | 0.172048647   |
| O  | -0.826493553  | -1.7926931667 | -0.8624771234 |
| Cu | 1.4872435279  | -1.2959811133 | 1.6432147976  |
| Cu | -0.4150716238 | 0.5994222212  | 0.6799016555  |
| Cu | 2.3019742069  | 1.1823520574  | -0.6470985012 |
| Cl | 0.5942486518  | -0.1654113161 | 3.2122437222  |
| Cl | -4.4487251537 | -0.4810898193 | -2.5060442856 |
| Cl | 0.5403992786  | 2.5360833349  | 0.0917642824  |
| Cl | 3.9076238671  | 2.4909191313  | -1.028957406  |
| Cl | 2.4445962027  | -0.4474910571 | -2.4673859702 |
| O  | -1.2717059907 | -1.2365556101 | 0.3894584788  |
| C  | -2.1877083052 | -1.1953083844 | -1.5943881908 |
| C  | -2.6247971909 | -0.80023409   | -0.1916414835 |
| H  | -2.6141456509 | -2.0766868993 | -2.055752114  |
| H  | -1.8264697958 | -0.4315519116 | -2.2799934102 |
| C  | -2.669747171  | 0.6682897535  | 0.1805206983  |
| C  | -2.3355274826 | 0.9786305003  | 1.5280826967  |

---

C -3.0149666609 1.7045843294 -0.6910444029  
C -2.3811796351 2.3074547406 1.9791573361  
H -2.2356629392 0.1806875487 2.2671579246  
C -3.0425830106 3.0126249688 -0.2216531206  
H -3.3124653735 1.4591274691 -1.7093527412  
C -2.725674414 3.3210698856 1.1022197025  
H -2.1284251175 2.5232361507 3.0138615185  
H -3.317061233 3.8090116643 -0.9079946012  
H -2.750938465 4.3520219547 1.4426269658  
Cl 2.0261372216 -3.1053658896 0.5609519848  
C -3.6905815595 -1.65378112 0.4352475325  
H -4.656773405 -1.3847801156 -0.0000860411  
H -3.4878176902 -2.7095403649 0.2286877918  
H -3.7147306993 -1.5010898085 1.5188817111

cpx8b

32

0 5

Cu -0.8267403151 -1.2084404595 0.9944704574  
O -0.9973979696 -0.0228028476 -0.4068654768  
O -0.660785305 -2.4085783155 2.2289990978  
Cu -1.1956412957 -1.1010864298 -1.9297805223  
Cu 0.8733929409 0.3274091698 -0.6002420457  
Cu -1.7338542905 1.6250741737 0.0948100494  
Cl 0.1902441129 -0.1320088106 -3.2632585924  
Cl 0.9599777102 0.5712208339 2.7869233162  
Cl 0.3155890754 2.5191467717 -0.4994649226  
Cl -3.0396971536 3.1668575311 0.6358114687  
Cl -2.6186356879 -0.4026795999 1.8196104206  
O 0.9252052764 -1.3842843538 0.3333090144  
C 1.8934570098 -0.9487760909 2.539141935  
C 2.1471131116 -1.2782926649 1.0747607477  
H 1.2951215668 -1.7434140752 2.9926711586  
H 2.8371416954 -0.8470319641 3.0826424104

---

C 2.9247909123 -0.1843576226 0.3316371164  
C 2.9079356834 -0.2136399814 -1.0843283556  
C 3.6410382409 0.8367540781 0.9656628468  
C 3.5630524975 0.7798114249 -1.8270688392  
H 2.5207477293 -1.0890040248 -1.6077338255  
C 4.2821392131 1.8134185621 0.2179804187  
H 3.674473476 0.8965568084 2.0493614866  
C 4.2309742579 1.8019753198 -1.1770460543  
H 3.5251701261 0.7377178925 -2.9122898012  
H 4.8167647435 2.60819937 0.7311603869  
H 4.7229581534 2.5847639627 -1.7467553354  
Cl -2.2577104804 -2.8069924181 -1.2920285181  
C 2.851994644 -2.6241321592 1.0194927433  
H 3.8141496437 -2.5910116524 1.5434566089  
H 2.2152420463 -3.3874131112 1.4816244638  
H 3.029597631 -2.912509317 -0.0205878587

cpx7b\_LiCl

34

0 5

Cu 0.890862931 -1.6649322862 -1.1824294939  
O 1.7389557834 -0.2594476108 -0.1969720848  
O -0.4876561879 -0.2163231707 -1.3601967673  
Cu 1.247426237 -0.0751827786 1.5943502143  
Cu 0.7248929395 1.2189053493 -0.8350342166  
Cu 3.5071180979 -0.7812331702 -0.046872527  
Cl 0.7675620646 2.0732805055 1.4430998029  
Cl -4.7836389563 -1.2560273868 -1.0833729899  
Cl 0.1951787918 2.8281689842 -2.1579816496  
Cl 4.4986206074 0.3459341311 1.4196409914  
Cl 3.1251644392 -2.4211344767 -1.4543746841  
O -0.9390364245 -0.5881366036 -0.0307382755  
C -2.9447893375 -1.3846541113 -1.061233461  
C -2.3576194048 -0.5617047815 0.0912770196

---

H -2.711515035 -2.4477277855 -0.9596256014  
H -2.6059508806 -1.0405313538 -2.0386593562  
C -2.8655717266 0.8753141725 0.0589529897  
C -3.5722613372 1.4314009253 1.1345873995  
C -2.6909558607 1.6551692724 -1.0967253178  
C -4.1247438649 2.7115113289 1.0456960606  
H -3.7173705811 0.8572574692 2.045328018  
C -3.2173550415 2.9454033416 -1.1754150603  
H -2.1238484394 1.2628027946 -1.9361588707  
C -3.9561129831 3.4710397965 -0.1139279858  
H -4.6788277034 3.1168071801 1.8882268995  
H -3.0319094394 3.535359003 -2.0690509551  
H -4.3756957287 4.4711628887 -0.1793702046  
Cl 1.1321065114 -1.980695371 2.4978972907  
C -2.562272227 -1.2703892873 1.4194447259  
H -3.6248157508 -1.4228485537 1.6359748946  
H -2.0661833753 -2.2452395758 1.369937853  
H -2.099922995 -0.7081280648 2.2381066644  
Cl -0.2983564312 -3.3370365202 -1.8566276079  
Li -4.9753943867 1.1868197458 -0.7920537144

TS4b\_LiCl

34

0 5

Cu 0.6053769684 -0.4676238634 -0.30602507  
O -0.1887051688 -0.2175232112 1.4440284112  
O 1.9643742801 0.8394013428 -0.0255858993  
Cu 0.2852337312 1.3171423782 2.3786725551  
Cu -0.1804863825 -1.3857435163 2.9015424187  
Cu -2.0165772159 -0.3688042209 1.1139334499  
Cl 0.8547816828 0.1019539157 4.2606672617  
Cl 6.0426545367 -0.335941702 0.214524243  
Cl -0.3168542819 -3.3865316848 2.2148484487  
Cl -2.8172027315 -0.5539188199 3.0787206481

---

Cl -1.6625164483 -0.6793098522 -1.0119013336  
O 2.2162495427 1.0857210718 1.3672166847  
C 3.8779104055 0.3853859504 -0.0042674607  
C 3.5936671607 0.6649265626 1.4767606166  
H 4.1730276715 1.2105174154 -0.6430425448  
H 3.6475465691 -0.5584297415 -0.4871754031  
C 3.6744029782 -0.607205301 2.3058137594  
C 4.4905483485 -0.7089444025 3.4361017379  
C 2.960114154 -1.7387441392 1.8873347217  
C 4.6186977112 -1.9233504494 4.1125885049  
H 5.0529074611 0.1536843385 3.7822198891  
C 3.0861480725 -2.9533010682 2.5605330918  
H 2.307577834 -1.682993462 1.0163278126  
C 3.9268342779 -3.0515115644 3.6711067592  
H 5.2608292085 -1.9850125066 4.9872835889  
H 2.5049591698 -3.8068660314 2.2205484547  
H 4.0265511936 -3.9963903411 4.1982368686  
Cl -0.8711965261 2.9235846385 1.6399814165  
C 4.35600823 1.8457832837 2.0352974977  
H 5.4288913568 1.6501592698 2.1075629304  
H 4.198767687 2.7062536264 1.3788101237  
H 3.9626706499 2.1008791386 3.0266397921  
Cl 1.7350121517 -1.7555395794 -1.6338158322  
Li 5.4048087216 -2.052021475 1.538854857

cpx7b\_Cl

33

-1 5

Cu 1.0538123072 -1.5338036056 -0.6348811689  
O 1.3867237342 0.3009977374 -0.2009159871  
O -0.7282378438 -0.751924677 -1.0216625994  
Cu 0.624680143 0.8669751871 1.4068953981  
Cu -0.0646239606 1.0324258763 -1.2402743681  
Cu 3.2106372236 0.5368204614 -0.1681388266



---

Cl -0.2227740211 2.7086108679 0.5554826082  
Cl -4.479193184 -2.7598854597 0.2476598908  
Cl -0.8036368083 1.7633990007 -3.118031844  
Cl 4.1092613855 2.3306430347 0.4495160381  
Cl 3.4555289907 -1.5392320002 -0.8646837641  
O -0.9728579147 -0.7984676246 0.406343204  
C -2.7973419564 -2.2473636061 -0.1594123754  
C -2.3692642254 -1.063996003 0.7067682216  
H -2.1286339112 -3.0972687033 0.0090336362  
H -2.7892675342 -2.0028701716 -1.2209158171  
C -3.1765828586 0.1974887305 0.4597931134  
C -3.6837405653 0.958171102 1.514771745  
C -3.3619895495 0.6647679367 -0.8452477669  
C -4.3524759582 2.1533315753 1.27552377  
H -3.5602707892 0.6218811341 2.5408430274  
C -4.0129919199 1.8687021606 -1.08414892  
H -2.9687599006 0.1060233264 -1.6907694984  
C -4.5133467075 2.6161137635 -0.0246205496  
H -4.7384411186 2.729311549 2.1137079696  
H -4.1098233518 2.224276571 -2.1069345102  
H -5.0216104904 3.5594066009 -0.2115743619  
Cl 1.2935881021 -0.3186552626 3.0355483232  
C -2.2668959503 -1.4813725582 2.164181923  
H -3.2576250492 -1.697317826 2.573899209  
H -1.6428975787 -2.3787634913 2.2332320313  
H -1.7884663309 -0.7006141096 2.7652571896  
Cl 0.5761645922 -3.6375605167 -0.7256219409

TS4b\_Cl

33

-1 5

Cu -0.477889994 1.8502581518 -0.5259895829  
O -0.8836192866 0.0387419048 -0.038520207  
O 0.9458418381 1.9649498414 0.7761918675

---

Cu -0.1507696382 -0.7392444306 1.5132329542  
Cu 0.0518491796 -1.2286032156 -1.1324063278  
Cu -2.6079921836 -0.175013264 -0.7249709228  
Cl -0.455618231 -2.7840091498 0.4425098549  
Cl 5.0243191293 1.4879987698 -0.0574586125  
Cl -0.6660176925 -0.4347830659 -3.026484567  
Cl -4.0879103328 -1.6274013829 -1.0727211736  
Cl -2.7976124512 2.041531637 -0.8141341269  
O 1.170566649 0.7973562005 1.5882834819  
C 2.6698887438 1.9233674036 0.4287939218  
C 2.6016783395 0.6019805849 1.1729223291  
H 2.998062444 2.8005209127 0.9723714205  
H 2.6465625199 2.0251410024 -0.6469107353  
C 2.6595074702 -0.6313155518 0.2960294718  
C 3.03132711 -1.864915893 0.82653678  
C 2.232967038 -0.5898237664 -1.0438380489  
C 2.9894250676 -3.028839381 0.0593520467  
H 3.3524749578 -1.9286768173 1.8620754866  
C 2.1601147075 -1.7642428407 -1.8103430085  
H 2.0550056622 0.3606685343 -1.5462348251  
C 2.5594264854 -2.987167823 -1.2550138202  
H 3.2868312952 -3.9727315841 0.5074595269  
H 1.9442261739 -1.6859403517 -2.8741538447  
H 2.5187630018 -3.8926850321 -1.8538628665  
Cl 0.2842504767 -1.3791877128 3.5260466842  
C 3.3788066858 0.5240312028 2.4648876928  
H 4.4211290577 0.2630321427 2.2731828923  
H 3.3455642379 1.4999073975 2.9574211176  
H 2.9028137607 -0.2024907196 3.1340373482  
Cl 0.3490687784 3.4748882962 -1.6889312075

TS5b

32

0 5

---

Cu 0.0281546172 1.5535408866 0.142040853  
Cl 0.0006047183 1.0709297544 2.4157294293  
O -0.9440040944 -0.0795855234 -0.0739415498  
C 3.519691505 1.2558958956 0.0686649628  
O 1.3996007611 2.6588800304 -0.2552180763  
Cu -1.2508262979 -0.8400816942 1.5938489175  
Cu -0.7038411005 -1.0622143514 -1.62877973  
Cu -2.6457580996 0.5746520643 -0.4674463326  
C 2.9893196242 2.0548265442 1.2140064178  
C 3.6131884065 -0.1506635829 0.137662433  
C 4.0154002112 2.0201586913 -1.0936958416  
O 2.2560048579 3.1500391214 0.770667579  
Cl -3.5256184437 -0.1171503341 1.4716878975  
Cl -0.4670135586 -2.8378254125 1.6927164275  
Cl 1.3355075486 -0.9565038984 -2.2059135549  
Cl -2.8179033378 -1.260034911 -2.138031419  
Cl -1.689094287 2.4362186304 -1.27002587  
H 2.4143400302 1.4528278614 1.9293493649  
H 3.8692628502 2.4413690941 1.7614386392  
C 4.4216297126 -0.8640631927 -0.7907210095  
C 2.8569225932 -0.8978066675 1.0840685079  
H 3.9211817632 3.0935771228 -0.9278611578  
H 5.0547324322 1.7590359429 -1.3250675626  
H 3.4085051772 1.7554995002 -1.9703193065  
C 4.507766086 -2.2348403917 -0.7386711622  
H 4.9935729569 -0.3220064312 -1.537577792  
C 2.9292104294 -2.2766521598 1.1095949227  
H 2.1511502274 -0.4047239148 1.7494126721  
C 3.7594041472 -2.9411770273 0.2098665221  
H 5.1387581983 -2.7691478785 -1.4422437187  
H 2.2980994013 -2.8303949891 1.7988461876  
H 3.810412964 -4.0270197721 0.2310463497

32

0 5

Cu 0.8442247813 -0.6087550091 -1.1481021223

Cl 0.9839443068 1.4113202667 -2.0191181655

O -0.6657894842 -0.0147367034 -0.1915429014

C 3.4256949078 -0.618349675 0.2148289648

O 2.7921945499 -1.1210094408 -1.0720280739

Cu -0.1473044746 1.8000090868 0.1899942143

Cu -1.1642738104 -1.6113478244 0.6233213006

Cu -2.3907443942 0.3596179071 -0.8268841445

C 4.0025401676 0.4998564135 -0.6454174855

C 2.3596163058 -0.3388584841 1.2350043494

C 4.4609847502 -1.6307504823 0.6302631334

O 3.7113589028 -0.280558319 -1.8247894238

Cl -2.4913076381 2.1786264787 0.3774006321

Cl 0.589230818 3.8015054528 0.4962590806

Cl 0.1897084556 -2.7710116933 -0.7469611177

Cl -2.724798175 -1.6035072086 2.0261928837

Cl -3.0091772129 -1.1579254886 -2.1297769419

H 3.433853557 1.4378147812 -0.6617015302

H 5.0761687876 0.6862487774 -0.5462290893

C 1.7259081441 -1.4119632909 1.8712700641

C 1.9472508973 0.9622877804 1.5490969608

H 5.1555428027 -1.8103662548 -0.1955410898

H 5.0188906846 -1.2512189087 1.4933823778

H 4.0025593625 -2.5841212055 0.9063772564

C 0.6788207169 -1.1994315954 2.7643694689

H 2.0290595944 -2.4327571392 1.6495200057

C 0.9077500342 1.1783967768 2.4599709624

H 2.4552878088 1.8312479301 1.1356876642

C 0.2665671965 0.0963957702 3.0599378552

H 0.2017922857 -2.0467923604 3.2521261591

H 0.6515667986 2.1983368545 2.737761845

H -0.5569714272 0.2611768075 3.7495579075

---

TS5b

32

0 5

Cu 0.8040631984 -0.6934411807 -1.0607452407

Cl 1.0521427946 1.2683029354 -2.0492907198

O -0.6966847762 0.029249044 -0.1875180812

C 3.3814376843 -0.7668716122 0.2177563512

O 2.6297425234 -1.3677216927 -0.8971570782

Cu -0.0735316495 1.8241403445 0.1321782395

Cu -1.3386254504 -1.5083801836 0.6459175378

Cu -2.3821487929 0.4809063263 -0.88089357

C 4.0290294307 0.3523013895 -0.5966881363

C 2.335091615 -0.4032609183 1.2466866467

C 4.4068854246 -1.7682790322 0.6980639853

O 4.1355219105 -0.3414222977 -1.8138985111

Cl -2.3925122206 2.3568898322 0.231582583

Cl 0.7718193575 3.7863215892 0.3870683597

Cl -0.0315418965 -2.7915097584 -0.6595042278

Cl -2.8555013821 -1.3464372126 2.0836494469

Cl -3.0888032967 -1.1004868961 -2.05769134

H 3.4065615185 1.2514699016 -0.7000720978

H 5.0334080948 0.6156525203 -0.2297436555

C 1.6529328728 -1.4399307538 1.8965162014

C 1.9698944341 0.9210527622 1.5288250269

H 5.1036420464 -1.9910688517 -0.1147237624

H 4.960807755 -1.3571484066 1.5489765193

H 3.935509098 -2.7045888367 1.0086582037

C 0.6096865017 -1.1692338515 2.7779181766

H 1.9184697554 -2.474620041 1.6916717209

C 0.9341883777 1.1930774191 2.4264221063

H 2.5161164421 1.7607978215 1.1048599931

C 0.2450158095 0.1470259468 3.0420115872

H 0.0945457257 -1.9873638956 3.2767723495

H 0.7168177003 2.2271083587 2.6853597616

H -0.5769116061 0.3580672302 3.7208486243

---

cpx9b

32

0 5

Cu -0.453626109 -0.7068006895 0.1056656548

Cl -0.126866786 -0.2042239499 2.4691351197

Cl -0.8222518525 0.8101700739 -1.7263701132

Cl 0.8580660208 -2.8130586751 -0.5368720763

O 1.2738224806 -0.038065114 -0.0015019108

Cu 1.3929788097 1.3084230934 -1.247071841

Cu 2.5168030034 -1.3119211245 -0.4778392206

Cu 1.8489465232 0.6484045942 1.6046230521

Cl 1.8565176389 2.7485763715 0.5563769201

Cl 3.1127309786 0.1545867655 -2.2653098338

Cl 3.7283637727 -0.689617857 1.4694025682

C -3.6460728958 -1.7632736346 1.4348633989

H -3.497687307 -1.1746424664 2.3470690187

H -4.4947362795 -2.4457960459 1.5490329815

C -3.5990169834 -0.974384644 0.1284824058

C -3.6147455931 0.5196697506 0.1690000759

C -3.4689729314 3.3143595103 0.1773307444

C -3.0044863476 1.2005727935 1.2279527922

C -4.1727543107 1.2647758492 -0.8734175321

C -4.1092540642 2.6517038317 -0.8634904156

C -2.9146857526 2.5851317577 1.2239282545

H -2.5545394813 0.6559047185 2.0536981761

H -4.6523215468 0.7670322944 -1.7115461198

H -4.5471061523 3.2151986355 -1.6829690381

H -2.4095896449 3.090930499 2.0427978221

H -3.4019454339 4.3992352232 0.1732437902

O -2.177822163 -1.5365062753 -0.0043498593

O -2.4466434166 -2.4745355977 1.0726250602

C -4.3707636137 -1.6294027461 -0.9859591275

H -5.4349502048 -1.3801638716 -0.9128069988

---

H -3.9908633749 -1.3019452396 -1.9586124692

H -4.2531774527 -2.7149894208 -0.9231908493

TS5b

32

0 5

Cu -0.5037391324 -0.5835554515 -0.122232829

Cl -0.3231532351 -0.1519516408 2.3178958979

Cl -0.6052857362 1.3211047021 -1.660123562

Cl 0.6378714649 -2.6359060487 -0.9883337534

O 1.2709326905 -0.0443673887 -0.0310966466

Cu 1.6171755854 1.4149466806 -1.1008604476

Cu 2.4434875046 -1.3573187391 -0.5781058852

Cu 1.8081506693 0.4357824596 1.6629244689

Cl 2.2516038324 2.5787828617 0.8590456696

Cl 3.2811718142 0.2135829138 -2.159076848

Cl 3.5131629897 -1.1409821744 1.5051548116

C -3.2782114508 -1.7782794417 1.4266562582

H -2.7904036477 -1.2072518372 2.2252321084

H -4.1754216874 -2.2881250489 1.8063318474

C -3.5393517442 -0.9939537153 0.1441925297

C -3.6294604698 0.5062583543 0.1681191724

C -3.6609409243 3.3005484036 0.0753360746

C -3.3122107537 1.2586209615 1.307029892

C -3.9451168624 1.181207552 -1.0225033007

C -3.9634265101 2.5665674714 -1.0659414662

C -3.3387366536 2.6434406082 1.2613876939

H -3.0431971479 0.7698376434 2.2383577415

H -4.1538603865 0.6195057924 -1.9285527812

H -4.1993388371 3.0734216669 -1.9972831327

H -3.1010236467 3.2137857337 2.1549166837

H -3.6679182182 4.3868712543 0.0418580664

O -2.2351416071 -1.2698504874 -0.478395137

O -2.3903034092 -2.7145831197 0.8530050116

---

C -4.5939128899 -1.6884446934 -0.6903107109  
H -5.5905618477 -1.455446559 -0.3000422719  
H -4.5434800377 -1.3790613887 -1.7367419125  
H -4.4324674052 -2.7692782651 -0.653909593

cpx3c

32

0 5

Cu -0.0931193979 0.6352537937 -1.7368182881  
O -0.662853916 -0.0938162673 -0.1148180431  
O 0.4722704245 1.4501948365 -3.5072351063  
Cl 0.0511420343 2.5959867425 -0.6013651329  
Cu -0.9506574675 1.3088017703 1.139759274  
Cu 0.3594141129 -1.6334423234 0.2247160807  
Cu -2.3764932063 -0.7505699894 -0.4270543417  
O 1.5993698269 1.8734235962 -3.6358210155  
Cl -0.454199039 2.3288059521 2.9557083132  
Cl 1.3259931997 -1.1712010809 -1.9560263803  
Cl -1.530301292 -2.9325722452 0.1468920756  
Cl -3.0507362943 0.3612714154 1.449840924  
Cl -2.3282068547 -0.0545476393 -2.5655510997  
C 3.7754415329 1.2610146412 -0.4188306179  
C 3.3156363479 0.9748298792 0.8092747954  
H 4.0925243035 2.2705458459 -0.6687559706  
H 3.7993082811 0.5225517486 -1.2177144749  
C 2.851687842 -0.3899251804 1.1019907473  
C 3.1744411987 2.0211918283 1.872604268  
C 1.730095966 -0.5958732325 1.9383119063  
C 3.4630639715 -1.5134287927 0.5230673305  
H 3.5940241083 1.6850499949 2.8284684412  
H 3.6844304895 2.940878374 1.5742576609  
H 2.1214717732 2.2796127882 2.0560170399  
C 1.206118826 -1.8779044178 2.1450416194  
H 1.2711655473 0.2520684269 2.4498119086



---

C 2.8927404422 -2.7687915081 0.6434354467  
H 4.3639727684 -1.3797571986 -0.0691219694  
C 1.7215034861 -2.958482313 1.4010241914  
H 0.3705139015 -2.0229714246 2.8284028114  
H 3.3350837772 -3.6172636228 0.1289289662  
H 1.2965593061 -3.9511033979 1.5226076399

TS1c

32

0 5

Cu -0.6486524252 -1.3444021667 -0.3693968586  
O 0.8092444981 -0.1371081959 -0.2749540157  
O -2.0432933425 -2.6640369981 -0.4448680097  
Cl -0.2843910369 -1.6494481361 1.849194255  
Cu 1.2790838678 0.1283214821 1.5373940493  
Cu 0.1020807905 1.3145976979 -1.2818447575  
Cu 2.3651336628 -1.0185220821 -0.7718913539  
O -3.1723360962 -2.6051736004 0.1259258468  
Cl 1.1384052789 1.3004865858 3.3161594787  
Cl -1.2791680245 -0.2531791121 -2.2757306421  
Cl 1.8340267092 2.5195080967 -1.6321280086  
Cl 3.5211419677 -0.0735773505 0.8303943059  
Cl 1.5906926667 -2.6315570185 -1.9090912152  
C -4.1476054904 -0.9759815501 0.2706150711  
C -3.4998901318 -0.023086427 1.0833070572  
H -4.9422885671 -1.5763025046 0.7076285313  
H -4.218875182 -0.8149838481 -0.8035960139  
C -2.8320617881 1.1124471145 0.4792461027  
C -3.4334603109 -0.2481081078 2.553076629  
C -1.6908911287 1.6705303975 1.0917068945  
C -3.2745695197 1.6634603733 -0.7441782928  
H -3.5715863179 0.6833716175 3.1126292866  
H -4.1825383215 -0.9766777057 2.8753233728  
H -2.4484425842 -0.652482249 2.8342885019

---

C -0.9257536087 2.6170948351 0.4202964977  
H -1.3524175958 1.3206935557 2.0668435527  
C -2.5527553302 2.6555577564 -1.3791927991  
H -4.1968422554 1.3057959176 -1.1947170061  
C -1.3277034702 3.084596889 -0.8473874653  
H -0.0280956077 3.0177744771 0.890477165  
H -2.9051757005 3.0641991546 -2.3218646672  
H -0.7655986057 3.8834611019 -1.3253484923

cpx4c

32

0 5

Cu -0.562691811 0.9682976213 -1.1567174071  
O 0.9101290228 -0.0625515354 -0.4771748376  
O -2.0592573866 2.02518843 -1.3553710884  
Cl -1.3456982044 -1.0804775706 -1.8262952678  
Cu 0.2253184858 -1.8362022099 -0.3053505901  
Cu 1.5280015426 1.0996016234 0.852713179  
Cu 2.6845415003 -0.4274729376 -0.9410881903  
O -3.1758786933 1.3319886589 -1.8278620224  
Cl -0.7372485367 -3.5120180798 0.6272333842  
Cl 0.4817124676 2.805517473 -0.1052597647  
Cl 2.2118083819 0.0276092486 2.5410134286  
Cl 2.4386532536 -2.5823961881 -0.7962355592  
Cl 3.7863969446 1.3730736664 -0.9107877683  
C -4.2298509651 1.4247495461 -0.8681308623  
C -3.9005102042 0.2535159684 -0.0096162436  
H -5.1609060319 1.2737697587 -1.4237159048  
H -4.2395565671 2.4100173175 -0.3960714951  
C -2.9594726706 0.3612114985 1.0347728645  
C -4.5020122972 -1.0187551448 -0.4609753973  
C -2.4444865448 -0.7981218186 1.6868462684  
C -2.4724353953 1.63318874 1.4539979179  
H -5.5787566905 -0.9972245041 -0.232807615

H -4.419346128 -1.0799655564 -1.5533360972

H -4.0639434712 -1.9214555243 -0.0359211266

C -1.5133561705 -0.6869685904 2.6939463536

H -2.7398197643 -1.7936532312 1.3709790093

C -1.5529989182 1.7321182423 2.4813398033

H -2.8085775395 2.5388238938 0.9642440184

C -1.0766412511 0.579091353 3.1043248901

H -1.0996879528 -1.5846454893 3.1453013545

H -1.1891350385 2.7089538575 2.7867814801

H -0.3419333364 0.6586147331 3.9016191056
